# Supplementary material for: Genes Induced by Fusarium Crown Rot in Wheat and Barley Significantly Overlap with those Induced by Drought Stress
Source: Research Square preprint supplement (doi:10.21203/rs.3.rs-109123/v1), 2020-11-19
Supplement: Supplementary file 1 [file 740a247814ae2a8317616042.xlsx]

## Sheet: 3B_RC_vs_RI_up
Tags	GO ID	GO Name	GO Category	FDR	P-Value	Nr test	Nr Reference	Non Annotated Test	Non Annotated Ref
OVER	GO:0009987	cellular process	BIOLOGICAL_PROCESS	3.33319e-23	1.46903e-25	5488	57947	4976	64935
OVER	GO:0008152	metabolic process	BIOLOGICAL_PROCESS	2.85732e-29	3.22898e-32	5253	54347	5211	68535
OVER	GO:0071704	organic substance metabolic process	BIOLOGICAL_PROCESS	3.84312e-14	4.47329e-16	4270	45249	6194	77633
OVER	GO:0044237	cellular metabolic process	BIOLOGICAL_PROCESS	6.85833e-13	8.91296e-15	4157	44173	6307	78709
OVER	GO:0044238	primary metabolic process	BIOLOGICAL_PROCESS	1.93786e-07	4.42363e-09	3935	42754	6529	80128
OVER	GO:0006807	nitrogen compound metabolic process	BIOLOGICAL_PROCESS	1.30658e-06	3.58797e-08	3484	37773	6980	85109
OVER	GO:1901564	organonitrogen compound metabolic process	BIOLOGICAL_PROCESS	8.50498e-26	2.88337e-28	2617	25045	7847	97837
OVER	GO:0019538	protein metabolic process	BIOLOGICAL_PROCESS	0.000381621	1.99225e-05	1967	21129	8497	101753
OVER	GO:0065007	biological regulation	BIOLOGICAL_PROCESS	0.000108833	4.73507e-06	1760	18644	8704	104238
OVER	GO:0044267	cellular protein metabolic process	BIOLOGICAL_PROCESS	0.000216743	1.05077e-05	1750	18609	8714	104273
OVER	GO:0050789	regulation of biological process	BIOLOGICAL_PROCESS	8.39944e-05	3.38863e-06	1548	16233	8916	106649
OVER	GO:0050896	response to stimulus	BIOLOGICAL_PROCESS	5.33677e-33	2.65626e-36	1509	12674	8955	110208
OVER	GO:0043412	macromolecule modification	BIOLOGICAL_PROCESS	8.79995e-11	1.40218e-12	1501	14701	8963	108181
OVER	GO:0006464	cellular protein modification process	BIOLOGICAL_PROCESS	9.57252e-24	3.89434e-26	1474	13059	8990	109823
OVER	GO:0036211	protein modification process	BIOLOGICAL_PROCESS	9.57252e-24	3.89434e-26	1474	13059	8990	109823
OVER	GO:0006793	phosphorus metabolic process	BIOLOGICAL_PROCESS	4.10361e-25	1.57671e-27	1464	12845	9000	110037
OVER	GO:0006796	phosphate-containing compound metabolic process	BIOLOGICAL_PROCESS	1.69717e-25	5.94556e-28	1457	12740	9007	110142
OVER	GO:0050794	regulation of cellular process	BIOLOGICAL_PROCESS	6.11766e-06	1.99452e-07	1430	14686	9034	108196
OVER	GO:0051179	localization	BIOLOGICAL_PROCESS	1.09722e-17	8.80357e-20	1230	11058	9234	111824
OVER	GO:0051234	establishment of localization	BIOLOGICAL_PROCESS	1.06982e-16	9.85899e-19	1183	10661	9281	112221
OVER	GO:0006810	transport	BIOLOGICAL_PROCESS	2.57765e-17	2.12644e-19	1173	10499	9291	112383
OVER	GO:0016310	phosphorylation	BIOLOGICAL_PROCESS	1.01904e-16	8.86726e-19	1109	9889	9355	112993
OVER	GO:0055114	oxidation-reduction process	BIOLOGICAL_PROCESS	6.80733e-28	1.07699e-30	1067	8615	9397	114267
OVER	GO:1901362	organic cyclic compound biosynthetic process	BIOLOGICAL_PROCESS	1.07119e-07	2.3242e-09	1051	10246	9413	112636
OVER	GO:0019438	aromatic compound biosynthetic process	BIOLOGICAL_PROCESS	1.01283e-06	2.73551e-08	999	9826	9465	113056
OVER	GO:0018130	heterocycle biosynthetic process	BIOLOGICAL_PROCESS	0.0022036	0.000146674	928	9649	9536	113233
OVER	GO:0006468	protein phosphorylation	BIOLOGICAL_PROCESS	1.54288e-23	6.62556e-26	882	7087	9582	115795
OVER	GO:0051716	cellular response to stimulus	BIOLOGICAL_PROCESS	3.01565e-13	3.81685e-15	857	7598	9607	115284
OVER	GO:0009056	catabolic process	BIOLOGICAL_PROCESS	1.35189e-19	8.24975e-22	854	7070	9610	115812
OVER	GO:0006950	response to stress	BIOLOGICAL_PROCESS	7.2281e-21	4.08413e-23	853	6975	9611	115907
OVER	GO:0044281	small molecule metabolic process	BIOLOGICAL_PROCESS	5.45596e-39	1.84969e-42	832	5790	9632	117092
OVER	GO:0055085	transmembrane transport	BIOLOGICAL_PROCESS	7.54555e-32	5.11621e-35	785	5682	9679	117200
OVER	GO:0009889	regulation of biosynthetic process	BIOLOGICAL_PROCESS	0.00327295	0.000226728	753	7747	9711	115135
OVER	GO:0031326	regulation of cellular biosynthetic process	BIOLOGICAL_PROCESS	0.00297206	0.000205213	750	7706	9714	115176
OVER	GO:0042221	response to chemical	BIOLOGICAL_PROCESS	1.10963e-30	1.12856e-33	739	5317	9725	117565
OVER	GO:0051252	regulation of RNA metabolic process	BIOLOGICAL_PROCESS	0.00429075	0.000308872	710	7297	9754	115585
OVER	GO:1903506	regulation of nucleic acid-templated transcription	BIOLOGICAL_PROCESS	0.000383723	2.01206e-05	696	6948	9768	115934
OVER	GO:2001141	regulation of RNA biosynthetic process	BIOLOGICAL_PROCESS	0.000383723	2.01206e-05	696	6948	9768	115934
OVER	GO:1901575	organic substance catabolic process	BIOLOGICAL_PROCESS	8.51504e-11	1.33754e-12	687	6068	9777	116814
OVER	GO:0006355	regulation of transcription, DNA-templated	BIOLOGICAL_PROCESS	0.000760666	4.39259e-05	687	6902	9777	115980
OVER	GO:0044248	cellular catabolic process	BIOLOGICAL_PROCESS	1.94376e-15	1.95439e-17	675	5585	9789	117297
OVER	GO:0007154	cell communication	BIOLOGICAL_PROCESS	1.94376e-15	1.95496e-17	588	4729	9876	118153
OVER	GO:0071702	organic substance transport	BIOLOGICAL_PROCESS	2.39374e-07	5.54545e-09	552	4998	9912	117884
OVER	GO:0006082	organic acid metabolic process	BIOLOGICAL_PROCESS	7.07539e-29	8.79527e-32	542	3611	9922	119271
OVER	GO:0043436	oxoacid metabolic process	BIOLOGICAL_PROCESS	8.56115e-28	1.45121e-30	534	3587	9930	119295
OVER	GO:0019752	carboxylic acid metabolic process	BIOLOGICAL_PROCESS	1.28049e-28	1.73645e-31	531	3525	9933	119357
OVER	GO:0007165	signal transduction	BIOLOGICAL_PROCESS	2.24769e-18	1.72724e-20	519	3896	9945	118986
OVER	GO:0023052	signaling	BIOLOGICAL_PROCESS	8.35956e-18	6.61283e-20	519	3926	9945	118956
OVER	GO:0006811	ion transport	BIOLOGICAL_PROCESS	3.52465e-16	3.38564e-18	503	3865	9961	119017
OVER	GO:1901565	organonitrogen compound catabolic process	BIOLOGICAL_PROCESS	5.54035e-15	5.76011e-17	478	3694	9986	119188
OVER	GO:0005975	carbohydrate metabolic process	BIOLOGICAL_PROCESS	0.00034374	1.77522e-05	439	4177	10025	118705
OVER	GO:0006629	lipid metabolic process	BIOLOGICAL_PROCESS	1.66042e-08	3.37751e-10	429	3643	10035	119239
OVER	GO:0070887	cellular response to chemical stimulus	BIOLOGICAL_PROCESS	3.71295e-18	2.89517e-20	413	2924	10051	119958
OVER	GO:0010033	response to organic substance	BIOLOGICAL_PROCESS	1.32797e-12	1.81585e-14	402	3107	10062	119775
OVER	GO:0034220	ion transmembrane transport	BIOLOGICAL_PROCESS	1.49647e-17	1.21761e-19	388	2724	10076	120158
OVER	GO:0044283	small molecule biosynthetic process	BIOLOGICAL_PROCESS	3.00952e-27	6.98686e-30	378	2264	10086	120618
OVER	GO:0009628	response to abiotic stimulus	BIOLOGICAL_PROCESS	2.44907e-13	3.07206e-15	353	2605	10111	120277
OVER	GO:1901700	response to oxygen-containing compound	BIOLOGICAL_PROCESS	2.91e-19	1.80868e-21	345	2267	10119	120615
OVER	GO:0006952	defense response	BIOLOGICAL_PROCESS	1.68315e-21	8.93978e-24	343	2167	10121	120715
OVER	GO:0006812	cation transport	BIOLOGICAL_PROCESS	6.49697e-11	1.0132e-12	334	2556	10130	120326
OVER	GO:0009719	response to endogenous stimulus	BIOLOGICAL_PROCESS	1.68014e-12	2.35436e-14	325	2388	10139	120494
OVER	GO:0009725	response to hormone	BIOLOGICAL_PROCESS	7.4645e-12	1.0966e-13	319	2365	10145	120517
OVER	GO:0070647	protein modification by small protein conjugation or removal	BIOLOGICAL_PROCESS	4.33221e-07	1.07706e-08	314	2606	10150	120276
OVER	GO:0009605	response to external stimulus	BIOLOGICAL_PROCESS	6.49154e-16	6.30887e-18	303	2033	10161	120849
OVER	GO:0016053	organic acid biosynthetic process	BIOLOGICAL_PROCESS	2.67332e-27	5.43788e-30	301	1635	10163	121247
OVER	GO:0046394	carboxylic acid biosynthetic process	BIOLOGICAL_PROCESS	2.67332e-27	5.43788e-30	301	1635	10163	121247
OVER	GO:0006520	cellular amino acid metabolic process	BIOLOGICAL_PROCESS	8.26383e-26	2.70823e-28	297	1648	10167	121234
OVER	GO:0098660	inorganic ion transmembrane transport	BIOLOGICAL_PROCESS	3.75111e-14	4.3238e-16	293	2018	10171	120864
OVER	GO:0044255	cellular lipid metabolic process	BIOLOGICAL_PROCESS	3.80504e-06	1.18701e-07	292	2461	10172	120421
OVER	GO:0032446	protein modification by small protein conjugation	BIOLOGICAL_PROCESS	2.86835e-10	4.82975e-12	285	2130	10179	120752
OVER	GO:0098655	cation transmembrane transport	BIOLOGICAL_PROCESS	8.97515e-13	1.19682e-14	278	1944	10186	120938
OVER	GO:0009607	response to biotic stimulus	BIOLOGICAL_PROCESS	1.52057e-18	1.08257e-20	268	1633	10196	121249
OVER	GO:0098662	inorganic cation transmembrane transport	BIOLOGICAL_PROCESS	1.57464e-12	2.18873e-14	267	1856	10197	121026
OVER	GO:0019637	organophosphate metabolic process	BIOLOGICAL_PROCESS	0.00145541	9.1282e-05	266	2436	10198	120446
OVER	GO:0016567	protein ubiquitination	BIOLOGICAL_PROCESS	5.20582e-10	9.00091e-12	265	1957	10199	120925
OVER	GO:0032787	monocarboxylic acid metabolic process	BIOLOGICAL_PROCESS	1.36537e-16	1.28066e-18	264	1668	10200	121214
OVER	GO:0071310	cellular response to organic substance	BIOLOGICAL_PROCESS	5.10352e-14	6.05571e-16	250	1643	10214	121239
OVER	GO:0044419	interspecies interaction between organisms	BIOLOGICAL_PROCESS	1.68708e-11	2.5166e-13	247	1721	10217	121161
OVER	GO:0043207	response to external biotic stimulus	BIOLOGICAL_PROCESS	7.12824e-14	8.69985e-16	239	1553	10225	121329
OVER	GO:0051707	response to other organism	BIOLOGICAL_PROCESS	7.12824e-14	8.69985e-16	239	1553	10225	121329
OVER	GO:0098542	defense response to other organism	BIOLOGICAL_PROCESS	1.20108e-13	1.47947e-15	216	1363	10248	121519
OVER	GO:0071495	cellular response to endogenous stimulus	BIOLOGICAL_PROCESS	2.46525e-14	2.75805e-16	213	1313	10251	121569
OVER	GO:0032870	cellular response to hormone stimulus	BIOLOGICAL_PROCESS	1.52475e-13	1.89539e-15	207	1290	10257	121592
OVER	GO:1901605	alpha-amino acid metabolic process	BIOLOGICAL_PROCESS	8.26383e-26	2.68665e-28	206	953	10258	121929
OVER	GO:0009755	hormone-mediated signaling pathway	BIOLOGICAL_PROCESS	6.36596e-14	7.62563e-16	205	1260	10259	121622
OVER	GO:0006790	sulfur compound metabolic process	BIOLOGICAL_PROCESS	5.66838e-20	3.33095e-22	193	988	10271	121894
OVER	GO:0015672	monovalent inorganic cation transport	BIOLOGICAL_PROCESS	1.16436e-07	2.53952e-09	189	1372	10275	121510
OVER	GO:0016311	dephosphorylation	BIOLOGICAL_PROCESS	6.17119e-05	2.41994e-06	189	1534	10275	121348
OVER	GO:0030001	metal ion transport	BIOLOGICAL_PROCESS	3.71517e-07	8.92483e-09	188	1389	10276	121493
OVER	GO:0010035	response to inorganic substance	BIOLOGICAL_PROCESS	1.24934e-09	2.28719e-11	183	1230	10281	121652
OVER	GO:0044282	small molecule catabolic process	BIOLOGICAL_PROCESS	2.56588e-28	3.76952e-31	180	721	10284	122161
OVER	GO:0055086	nucleobase-containing small molecule metabolic process	BIOLOGICAL_PROCESS	0.00827148	0.000702921	178	1609	10286	121273
OVER	GO:0009636	response to toxic substance	BIOLOGICAL_PROCESS	2.43382e-10	4.04307e-12	174	1123	10290	121759
OVER	GO:0033993	response to lipid	BIOLOGICAL_PROCESS	3.99359e-10	6.85982e-12	172	1114	10292	121768
OVER	GO:0048583	regulation of response to stimulus	BIOLOGICAL_PROCESS	1.01224e-06	2.72248e-08	171	1255	10293	121627
OVER	GO:0006820	anion transport	BIOLOGICAL_PROCESS	7.42485e-10	1.31732e-11	170	1107	10294	121775
OVER	GO:0006979	response to oxidative stress	BIOLOGICAL_PROCESS	4.26708e-07	1.0464e-08	169	1217	10295	121665
OVER	GO:0035556	intracellular signal transduction	BIOLOGICAL_PROCESS	0.00134605	8.42707e-05	163	1382	10301	121500
OVER	GO:0098754	detoxification	BIOLOGICAL_PROCESS	1.25053e-07	2.76985e-09	157	1083	10307	121799
OVER	GO:1901615	organic hydroxy compound metabolic process	BIOLOGICAL_PROCESS	2.79181e-08	5.83665e-10	155	1038	10309	121844
OVER	GO:1901701	cellular response to oxygen-containing compound	BIOLOGICAL_PROCESS	2.81319e-09	5.37269e-11	153	982	10311	121900
OVER	GO:0072330	monocarboxylic acid biosynthetic process	BIOLOGICAL_PROCESS	6.66777e-13	8.58996e-15	151	847	10313	122035
OVER	GO:0097237	cellular response to toxic substance	BIOLOGICAL_PROCESS	2.2389e-05	8.09636e-07	142	1058	10322	121824
OVER	GO:1990748	cellular detoxification	BIOLOGICAL_PROCESS	2.2389e-05	8.09636e-07	142	1058	10322	121824
OVER	GO:0009266	response to temperature stimulus	BIOLOGICAL_PROCESS	3.34549e-09	6.42709e-11	141	882	10323	122000
OVER	GO:1902600	proton transmembrane transport	BIOLOGICAL_PROCESS	0.000139993	6.40716e-06	141	1096	10323	121786
OVER	GO:0016054	organic acid catabolic process	BIOLOGICAL_PROCESS	3.00952e-27	7.14204e-30	135	453	10329	122429
OVER	GO:0046395	carboxylic acid catabolic process	BIOLOGICAL_PROCESS	3.00952e-27	7.14204e-30	135	453	10329	122429
OVER	GO:0006970	response to osmotic stress	BIOLOGICAL_PROCESS	4.47553e-17	3.84383e-19	133	609	10331	122273
OVER	GO:0098869	cellular oxidant detoxification	BIOLOGICAL_PROCESS	0.000106447	4.61924e-06	132	1003	10332	121879
OVER	GO:0008652	cellular amino acid biosynthetic process	BIOLOGICAL_PROCESS	3.73206e-14	4.25967e-16	128	636	10336	122246
OVER	GO:0009651	response to salt stress	BIOLOGICAL_PROCESS	9.0984e-19	5.96347e-21	125	520	10339	122362
OVER	GO:0015711	organic anion transport	BIOLOGICAL_PROCESS	1.70746e-09	3.18377e-11	118	681	10346	122201
OVER	GO:0006470	protein dephosphorylation	BIOLOGICAL_PROCESS	0.000381621	1.99242e-05	117	895	10347	121987
OVER	GO:0009737	response to abscisic acid	BIOLOGICAL_PROCESS	1.32087e-05	4.53774e-07	116	808	10348	122074
OVER	GO:0097305	response to alcohol	BIOLOGICAL_PROCESS	2.37584e-05	8.61841e-07	116	820	10348	122062
OVER	GO:0098656	anion transmembrane transport	BIOLOGICAL_PROCESS	6.35543e-10	1.11322e-11	113	628	10351	122254
OVER	GO:0072593	reactive oxygen species metabolic process	BIOLOGICAL_PROCESS	0.00022477	1.09477e-05	113	844	10351	122038
OVER	GO:1901361	organic cyclic compound catabolic process	BIOLOGICAL_PROCESS	0.00731047	0.000612166	110	916	10354	121966
OVER	GO:0006575	cellular modified amino acid metabolic process	BIOLOGICAL_PROCESS	1.06982e-16	9.76487e-19	109	449	10355	122433
OVER	GO:0002376	immune system process	BIOLOGICAL_PROCESS	3.05191e-10	5.17331e-12	107	572	10357	122310
OVER	GO:0001101	response to acid chemical	BIOLOGICAL_PROCESS	9.03628e-13	1.21518e-14	105	497	10359	122385
OVER	GO:0009415	response to water	BIOLOGICAL_PROCESS	3.97814e-14	4.67541e-16	104	462	10360	122420
OVER	GO:0006955	immune response	BIOLOGICAL_PROCESS	9.28717e-11	1.49031e-12	103	528	10361	122354
OVER	GO:1901607	alpha-amino acid biosynthetic process	BIOLOGICAL_PROCESS	1.47956e-08	2.97617e-10	102	579	10362	122303
OVER	GO:0042743	hydrogen peroxide metabolic process	BIOLOGICAL_PROCESS	0.000279871	1.39793e-05	102	747	10362	122135
OVER	GO:0045087	innate immune response	BIOLOGICAL_PROCESS	2.02761e-10	3.34536e-12	101	521	10363	122361
OVER	GO:0009072	aromatic amino acid family metabolic process	BIOLOGICAL_PROCESS	5.86152e-26	1.78846e-28	99	264	10365	122618
OVER	GO:0016042	lipid catabolic process	BIOLOGICAL_PROCESS	4.71809e-07	1.18365e-08	99	602	10365	122280
OVER	GO:0009414	response to water deprivation	BIOLOGICAL_PROCESS	1.00355e-14	1.07738e-16	98	409	10366	122473
OVER	GO:0008643	carbohydrate transport	BIOLOGICAL_PROCESS	6.94734e-13	9.10715e-15	98	444	10366	122438
OVER	GO:0019748	secondary metabolic process	BIOLOGICAL_PROCESS	1.1574e-08	2.31507e-10	97	536	10367	122346
OVER	GO:0080134	regulation of response to stress	BIOLOGICAL_PROCESS	0.000170698	7.9861e-06	97	690	10367	122192
OVER	GO:0006631	fatty acid metabolic process	BIOLOGICAL_PROCESS	0.000675137	3.86817e-05	97	722	10367	122160
OVER	GO:0071396	cellular response to lipid	BIOLOGICAL_PROCESS	5.29526e-07	1.33653e-08	94	562	10370	122320
OVER	GO:0006749	glutathione metabolic process	BIOLOGICAL_PROCESS	7.76117e-20	4.64846e-22	92	294	10372	122588
OVER	GO:0005996	monosaccharide metabolic process	BIOLOGICAL_PROCESS	6.05899e-05	2.36909e-06	92	623	10372	122259
OVER	GO:0009617	response to bacterium	BIOLOGICAL_PROCESS	0.000173212	8.12329e-06	92	645	10372	122237
OVER	GO:0042744	hydrogen peroxide catabolic process	BIOLOGICAL_PROCESS	0.005256	0.000388453	92	728	10372	122154
OVER	GO:0009063	cellular amino acid catabolic process	BIOLOGICAL_PROCESS	1.75468e-22	7.93166e-25	90	252	10374	122630
OVER	GO:0042537	benzene-containing compound metabolic process	BIOLOGICAL_PROCESS	1.72427e-26	5.06624e-29	89	208	10375	122674
OVER	GO:0046777	protein autophosphorylation	BIOLOGICAL_PROCESS	2.51961e-08	5.21063e-10	89	482	10375	122400
OVER	GO:1901617	organic hydroxy compound biosynthetic process	BIOLOGICAL_PROCESS	0.0011026	6.62883e-05	89	659	10375	122223
OVER	GO:0009620	response to fungus	BIOLOGICAL_PROCESS	1.35282e-06	3.74401e-08	88	526	10376	122356
OVER	GO:1901606	alpha-amino acid catabolic process	BIOLOGICAL_PROCESS	3.52184e-25	1.27358e-27	87	210	10377	122672
OVER	GO:0007166	cell surface receptor signaling pathway	BIOLOGICAL_PROCESS	0.00254506	0.000171703	87	661	10377	122221
OVER	GO:0051239	regulation of multicellular organismal process	BIOLOGICAL_PROCESS	0.00405291	0.000289316	87	673	10377	122209
OVER	GO:0072511	divalent inorganic cation transport	BIOLOGICAL_PROCESS	6.72431e-08	1.4514e-09	85	462	10379	122420
OVER	GO:0042742	defense response to bacterium	BIOLOGICAL_PROCESS	0.000294651	1.48508e-05	85	593	10379	122289
OVER	GO:0009698	phenylpropanoid metabolic process	BIOLOGICAL_PROCESS	1.51752e-12	2.09219e-14	83	346	10381	122536
OVER	GO:0009308	amine metabolic process	BIOLOGICAL_PROCESS	8.52883e-11	1.34935e-12	83	379	10381	122503
OVER	GO:0009409	response to cold	BIOLOGICAL_PROCESS	1.41436e-09	2.60528e-11	82	398	10382	122484
OVER	GO:0014070	response to organic cyclic compound	BIOLOGICAL_PROCESS	2.79181e-08	5.81893e-10	81	421	10383	122461
OVER	GO:0050832	defense response to fungus	BIOLOGICAL_PROCESS	1.17904e-07	2.58486e-09	81	437	10383	122445
OVER	GO:0010646	regulation of cell communication	BIOLOGICAL_PROCESS	0.000279871	1.39481e-05	81	556	10383	122326
OVER	GO:0009966	regulation of signal transduction	BIOLOGICAL_PROCESS	0.000279244	1.38849e-05	80	547	10384	122335
OVER	GO:0023051	regulation of signaling	BIOLOGICAL_PROCESS	0.000321676	1.64673e-05	80	550	10384	122332
OVER	GO:0070838	divalent metal ion transport	BIOLOGICAL_PROCESS	2.8526e-06	8.57489e-08	75	430	10389	122452
OVER	GO:0034219	carbohydrate transmembrane transport	BIOLOGICAL_PROCESS	2.30136e-12	3.27688e-14	74	289	10390	122593
OVER	GO:0046942	carboxylic acid transport	BIOLOGICAL_PROCESS	1.39659e-07	3.12493e-09	73	377	10391	122505
OVER	GO:0015849	organic acid transport	BIOLOGICAL_PROCESS	1.39659e-07	3.12493e-09	73	377	10391	122505
OVER	GO:0048584	positive regulation of response to stimulus	BIOLOGICAL_PROCESS	0.000150344	6.94887e-06	73	474	10391	122408
OVER	GO:0044550	secondary metabolite biosynthetic process	BIOLOGICAL_PROCESS	2.59317e-10	4.33709e-12	71	304	10393	122578
OVER	GO:0019318	hexose metabolic process	BIOLOGICAL_PROCESS	0.00796284	0.000673993	69	522	10395	122360
OVER	GO:0044242	cellular lipid catabolic process	BIOLOGICAL_PROCESS	8.49515e-10	1.51682e-11	67	286	10397	122596
OVER	GO:0042180	cellular ketone metabolic process	BIOLOGICAL_PROCESS	2.23262e-06	6.58508e-08	67	363	10397	122519
OVER	GO:0030258	lipid modification	BIOLOGICAL_PROCESS	0.00223732	0.000149575	66	464	10398	122418
OVER	GO:0010817	regulation of hormone levels	BIOLOGICAL_PROCESS	0.00260263	0.000176841	64	449	10400	122433
OVER	GO:0009699	phenylpropanoid biosynthetic process	BIOLOGICAL_PROCESS	1.00577e-12	1.36391e-14	63	214	10401	122668
OVER	GO:1903825	organic acid transmembrane transport	BIOLOGICAL_PROCESS	2.57578e-07	6.0545e-09	63	308	10401	122574
OVER	GO:1905039	carboxylic acid transmembrane transport	BIOLOGICAL_PROCESS	2.57578e-07	6.0545e-09	63	308	10401	122574
OVER	GO:0006857	oligopeptide transport	BIOLOGICAL_PROCESS	4.412e-08	9.32358e-10	62	284	10402	122598
OVER	GO:0009753	response to jasmonic acid	BIOLOGICAL_PROCESS	4.76029e-12	6.88571e-14	61	211	10403	122671
OVER	GO:0044106	cellular amine metabolic process	BIOLOGICAL_PROCESS	9.52927e-09	1.88453e-10	60	257	10404	122625
OVER	GO:0031347	regulation of defense response	BIOLOGICAL_PROCESS	0.000169245	7.899e-06	60	365	10404	122517
OVER	GO:0009611	response to wounding	BIOLOGICAL_PROCESS	0.00429075	0.00030855	56	387	10408	122495
OVER	GO:0042440	pigment metabolic process	BIOLOGICAL_PROCESS	0.00206417	0.000133428	55	364	10409	122518
OVER	GO:0035672	oligopeptide transmembrane transport	BIOLOGICAL_PROCESS	2.70631e-07	6.3919e-09	54	243	10410	122639
OVER	GO:0009723	response to ethylene	BIOLOGICAL_PROCESS	1.64093e-06	4.71008e-08	53	253	10411	122629
OVER	GO:0043648	dicarboxylic acid metabolic process	BIOLOGICAL_PROCESS	0.00033239	1.70909e-05	53	317	10411	122565
OVER	GO:0009311	oligosaccharide metabolic process	BIOLOGICAL_PROCESS	7.33331e-06	2.44471e-07	52	261	10412	122621
OVER	GO:0009064	glutamine family amino acid metabolic process	BIOLOGICAL_PROCESS	8.4575e-05	3.42161e-06	52	289	10412	122593
OVER	GO:0040008	regulation of growth	BIOLOGICAL_PROCESS	0.000317359	1.61746e-05	52	308	10412	122574
OVER	GO:0044272	sulfur compound biosynthetic process	BIOLOGICAL_PROCESS	0.00973236	0.000838068	52	369	10412	122513
OVER	GO:0097306	cellular response to alcohol	BIOLOGICAL_PROCESS	0.000480187	2.61333e-05	51	306	10413	122576
OVER	GO:0071215	cellular response to abscisic acid stimulus	BIOLOGICAL_PROCESS	0.000480187	2.61333e-05	51	306	10413	122576
OVER	GO:0018958	phenol-containing compound metabolic process	BIOLOGICAL_PROCESS	1.72381e-09	3.23373e-11	50	179	10414	122703
OVER	GO:0006576	cellular biogenic amine metabolic process	BIOLOGICAL_PROCESS	2.46347e-06	7.32166e-08	50	235	10414	122647
OVER	GO:0023014	signal transduction by protein phosphorylation	BIOLOGICAL_PROCESS	4.53303e-06	1.42922e-07	50	241	10414	122641
OVER	GO:0048585	negative regulation of response to stimulus	BIOLOGICAL_PROCESS	0.00513383	0.000377683	50	337	10414	122545
OVER	GO:0009074	aromatic amino acid family catabolic process	BIOLOGICAL_PROCESS	1.87137e-22	8.6706e-25	48	60	10416	122822
OVER	GO:1902221	erythrose 4-phosphate/phosphoenolpyruvate family amino acid metabolic process	BIOLOGICAL_PROCESS	1.21278e-21	6.16739e-24	48	64	10416	122818
OVER	GO:0006558	L-phenylalanine metabolic process	BIOLOGICAL_PROCESS	1.21278e-21	6.16739e-24	48	64	10416	122818
OVER	GO:0009814	defense response, incompatible interaction	BIOLOGICAL_PROCESS	2.08709e-06	6.10867e-08	48	219	10416	122663
OVER	GO:0071407	cellular response to organic cyclic compound	BIOLOGICAL_PROCESS	9.52448e-05	3.96661e-06	48	259	10416	122623
OVER	GO:1901264	carbohydrate derivative transport	BIOLOGICAL_PROCESS	0.000333862	1.72043e-05	48	276	10416	122606
OVER	GO:0009738	abscisic acid-activated signaling pathway	BIOLOGICAL_PROCESS	0.000995737	5.95259e-05	48	292	10416	122590
OVER	GO:1901136	carbohydrate derivative catabolic process	BIOLOGICAL_PROCESS	5.56357e-06	1.78557e-07	47	221	10417	122661
OVER	GO:0007034	vacuolar transport	BIOLOGICAL_PROCESS	0.00020195	9.58515e-06	47	261	10417	122621
OVER	GO:0006865	amino acid transport	BIOLOGICAL_PROCESS	0.000252948	1.24059e-05	47	264	10417	122618
OVER	GO:0008219	cell death	BIOLOGICAL_PROCESS	0.00160815	0.000101916	47	291	10417	122591
OVER	GO:0006813	potassium ion transport	BIOLOGICAL_PROCESS	0.00260263	0.000177646	47	299	10417	122583
OVER	GO:0009696	salicylic acid metabolic process	BIOLOGICAL_PROCESS	2.46868e-11	3.73831e-13	46	132	10418	122750
OVER	GO:0015748	organophosphate ester transport	BIOLOGICAL_PROCESS	0.000157297	7.30581e-06	46	250	10418	122632
OVER	GO:0003333	amino acid transmembrane transport	BIOLOGICAL_PROCESS	0.000232577	1.13805e-05	46	255	10418	122627
OVER	GO:0032101	regulation of response to external stimulus	BIOLOGICAL_PROCESS	0.000418846	2.24357e-05	46	263	10418	122619
OVER	GO:0071805	potassium ion transmembrane transport	BIOLOGICAL_PROCESS	0.000453862	2.45677e-05	45	256	10419	122626
OVER	GO:0002831	regulation of response to biotic stimulus	BIOLOGICAL_PROCESS	0.000486075	2.6696e-05	45	257	10419	122625
OVER	GO:0042908	xenobiotic transport	BIOLOGICAL_PROCESS	0.000753576	4.34313e-05	45	263	10419	122619
OVER	GO:0031146	SCF-dependent proteasomal ubiquitin-dependent protein catabolic process	BIOLOGICAL_PROCESS	0.000822393	4.77692e-05	44	256	10420	122626
OVER	GO:0009991	response to extracellular stimulus	BIOLOGICAL_PROCESS	0.0017481	0.000111615	44	267	10420	122615
OVER	GO:0009073	aromatic amino acid family biosynthetic process	BIOLOGICAL_PROCESS	1.22558e-07	2.70074e-09	43	162	10421	122720
OVER	GO:0006855	drug transmembrane transport	BIOLOGICAL_PROCESS	2.42179e-05	8.86722e-07	43	206	10421	122676
OVER	GO:0015893	drug transport	BIOLOGICAL_PROCESS	2.42179e-05	8.86722e-07	43	206	10421	122676
OVER	GO:0042493	response to drug	BIOLOGICAL_PROCESS	2.94418e-05	1.10461e-06	43	208	10421	122674
OVER	GO:0009116	nucleoside metabolic process	BIOLOGICAL_PROCESS	7.85384e-05	3.15964e-06	43	218	10421	122664
OVER	GO:1901657	glycosyl compound metabolic process	BIOLOGICAL_PROCESS	0.00762874	0.000643128	43	284	10421	122598
OVER	GO:0042430	indole-containing compound metabolic process	BIOLOGICAL_PROCESS	4.58191e-07	1.14431e-08	42	165	10422	122717
OVER	GO:0072329	monocarboxylic acid catabolic process	BIOLOGICAL_PROCESS	1.30658e-06	3.58519e-08	42	173	10422	122709
OVER	GO:0000096	sulfur amino acid metabolic process	BIOLOGICAL_PROCESS	2.77092e-05	1.03021e-06	42	200	10422	122682
OVER	GO:0005984	disaccharide metabolic process	BIOLOGICAL_PROCESS	0.000525631	2.93436e-05	41	226	10423	122656
OVER	GO:0062012	regulation of small molecule metabolic process	BIOLOGICAL_PROCESS	9.69659e-06	3.28735e-07	40	176	10424	122706
OVER	GO:0031667	response to nutrient levels	BIOLOGICAL_PROCESS	0.00114506	6.93583e-05	40	228	10424	122654
OVER	GO:1902222	erythrose 4-phosphate/phosphoenolpyruvate family amino acid catabolic process	BIOLOGICAL_PROCESS	2.21635e-18	1.67811e-20	38	45	10426	122837
OVER	GO:0006559	L-phenylalanine catabolic process	BIOLOGICAL_PROCESS	2.21635e-18	1.67811e-20	38	45	10426	122837
OVER	GO:0010565	regulation of cellular ketone metabolic process	BIOLOGICAL_PROCESS	1.39672e-05	4.8141e-07	38	165	10426	122717
OVER	GO:0009069	serine family amino acid metabolic process	BIOLOGICAL_PROCESS	0.00122968	7.62698e-05	38	213	10426	122669
OVER	GO:0009694	jasmonic acid metabolic process	BIOLOGICAL_PROCESS	2.57578e-07	6.0022e-09	37	129	10427	122753
OVER	GO:0071395	cellular response to jasmonic acid stimulus	BIOLOGICAL_PROCESS	3.00383e-07	7.12854e-09	37	130	10427	122752
OVER	GO:0072507	divalent inorganic cation homeostasis	BIOLOGICAL_PROCESS	6.96754e-05	2.7702e-06	36	165	10428	122717
OVER	GO:0031668	cellular response to extracellular stimulus	BIOLOGICAL_PROCESS	0.00169557	0.000108069	36	201	10428	122681
OVER	GO:0071496	cellular response to external stimulus	BIOLOGICAL_PROCESS	0.00330231	0.000229135	36	210	10428	122672
OVER	GO:0009867	jasmonic acid mediated signaling pathway	BIOLOGICAL_PROCESS	4.30972e-07	1.06659e-08	35	120	10429	122762
OVER	GO:0042435	indole-containing compound biosynthetic process	BIOLOGICAL_PROCESS	1.52109e-05	5.25995e-07	35	145	10429	122737
OVER	GO:0042401	cellular biogenic amine biosynthetic process	BIOLOGICAL_PROCESS	2.77092e-05	1.02892e-06	35	150	10429	122732
OVER	GO:0009309	amine biosynthetic process	BIOLOGICAL_PROCESS	2.77092e-05	1.02892e-06	35	150	10429	122732
OVER	GO:0009751	response to salicylic acid	BIOLOGICAL_PROCESS	0.000566332	3.18078e-05	35	180	10429	122702
OVER	GO:0019395	fatty acid oxidation	BIOLOGICAL_PROCESS	2.24325e-07	5.14612e-09	34	110	10430	122772
OVER	GO:0034440	lipid oxidation	BIOLOGICAL_PROCESS	3.72691e-07	9.01297e-09	34	113	10430	122769
OVER	GO:0009062	fatty acid catabolic process	BIOLOGICAL_PROCESS	9.78212e-07	2.61991e-08	34	119	10430	122763
OVER	GO:0042594	response to starvation	BIOLOGICAL_PROCESS	0.00728767	0.000609433	34	206	10430	122676
OVER	GO:0009800	cinnamic acid biosynthetic process	BIOLOGICAL_PROCESS	1.06982e-16	9.91356e-19	33	36	10431	122846
OVER	GO:0009803	cinnamic acid metabolic process	BIOLOGICAL_PROCESS	1.06982e-16	9.91356e-19	33	36	10431	122846
OVER	GO:0006635	fatty acid beta-oxidation	BIOLOGICAL_PROCESS	1.50326e-07	3.3806e-09	33	102	10431	122780
OVER	GO:0031349	positive regulation of defense response	BIOLOGICAL_PROCESS	7.01474e-06	2.29887e-07	33	126	10431	122756
OVER	GO:0048638	regulation of developmental growth	BIOLOGICAL_PROCESS	0.00013441	6.04535e-06	33	150	10431	122732
OVER	GO:0009070	serine family amino acid biosynthetic process	BIOLOGICAL_PROCESS	0.000147815	6.81527e-06	33	151	10431	122731
OVER	GO:0006040	amino sugar metabolic process	BIOLOGICAL_PROCESS	1.15329e-05	3.93595e-07	32	123	10432	122759
OVER	GO:0031669	cellular response to nutrient levels	BIOLOGICAL_PROCESS	0.00088809	5.20871e-05	32	162	10432	122720
OVER	GO:0098661	inorganic anion transmembrane transport	BIOLOGICAL_PROCESS	0.000970168	5.76685e-05	32	163	10432	122719
OVER	GO:0009739	response to gibberellin	BIOLOGICAL_PROCESS	0.00195249	0.000125768	32	171	10432	122711
OVER	GO:0016998	cell wall macromolecule catabolic process	BIOLOGICAL_PROCESS	0.00875257	0.000748751	32	192	10432	122690
OVER	GO:0009081	branched-chain amino acid metabolic process	BIOLOGICAL_PROCESS	8.48493e-07	2.25331e-08	31	100	10433	122782
OVER	GO:0007031	peroxisome organization	BIOLOGICAL_PROCESS	0.000122905	5.44454e-06	31	135	10433	122747
OVER	GO:0018298	protein-chromophore linkage	BIOLOGICAL_PROCESS	0.000320973	1.63951e-05	31	144	10433	122738
OVER	GO:0010563	negative regulation of phosphorus metabolic process	BIOLOGICAL_PROCESS	0.000430407	2.31522e-05	31	147	10433	122735
OVER	GO:0045936	negative regulation of phosphate metabolic process	BIOLOGICAL_PROCESS	0.000430407	2.31522e-05	31	147	10433	122735
OVER	GO:0006568	tryptophan metabolic process	BIOLOGICAL_PROCESS	1.39884e-06	3.93136e-08	30	97	10434	122785
OVER	GO:0006586	indolalkylamine metabolic process	BIOLOGICAL_PROCESS	1.39884e-06	3.93136e-08	30	97	10434	122785
OVER	GO:0032103	positive regulation of response to external stimulus	BIOLOGICAL_PROCESS	2.06809e-05	7.2917e-07	30	114	10434	122768
OVER	GO:0034754	cellular hormone metabolic process	BIOLOGICAL_PROCESS	0.00128772	8.00371e-05	30	151	10434	122731
OVER	GO:0006525	arginine metabolic process	BIOLOGICAL_PROCESS	3.6759e-11	5.60795e-13	29	50	10435	122832
OVER	GO:0002833	positive regulation of response to biotic stimulus	BIOLOGICAL_PROCESS	2.19187e-05	7.82723e-07	29	108	10435	122774
OVER	GO:0009267	cellular response to starvation	BIOLOGICAL_PROCESS	0.0021467	0.00014187	29	149	10435	122733
OVER	GO:0010337	regulation of salicylic acid metabolic process	BIOLOGICAL_PROCESS	7.39247e-07	1.95484e-08	28	82	10436	122800
OVER	GO:0009312	oligosaccharide biosynthetic process	BIOLOGICAL_PROCESS	0.00208882	0.000136549	28	141	10436	122741
OVER	GO:1901071	glucosamine-containing compound metabolic process	BIOLOGICAL_PROCESS	2.1856e-06	6.4217e-08	27	82	10437	122800
OVER	GO:1901000	regulation of response to salt stress	BIOLOGICAL_PROCESS	4.53303e-06	1.4273e-07	27	86	10437	122796
OVER	GO:0047484	regulation of response to osmotic stress	BIOLOGICAL_PROCESS	2.40226e-05	8.74141e-07	27	96	10437	122786
OVER	GO:0043094	cellular metabolic compound salvage	BIOLOGICAL_PROCESS	0.00201587	0.000130078	27	133	10437	122749
OVER	GO:0009112	nucleobase metabolic process	BIOLOGICAL_PROCESS	0.00217799	0.000144724	27	134	10437	122748
OVER	GO:0010923	negative regulation of phosphatase activity	BIOLOGICAL_PROCESS	3.03019e-06	9.14297e-08	26	78	10438	122804
OVER	GO:0035305	negative regulation of dephosphorylation	BIOLOGICAL_PROCESS	3.64508e-06	1.12454e-07	26	79	10438	122803
OVER	GO:0009084	glutamine family amino acid biosynthetic process	BIOLOGICAL_PROCESS	9.54829e-05	3.99239e-06	26	99	10438	122783
OVER	GO:0006563	L-serine metabolic process	BIOLOGICAL_PROCESS	0.000122668	5.42019e-06	26	101	10438	122781
OVER	GO:0010118	stomatal movement	BIOLOGICAL_PROCESS	0.00208882	0.000136786	26	126	10438	122756
OVER	GO:0000097	sulfur amino acid biosynthetic process	BIOLOGICAL_PROCESS	0.00524309	0.000386314	26	136	10438	122746
OVER	GO:1901072	glucosamine-containing compound catabolic process	BIOLOGICAL_PROCESS	6.37737e-07	1.66479e-08	25	65	10439	122817
OVER	GO:0046348	amino sugar catabolic process	BIOLOGICAL_PROCESS	6.37737e-07	1.66479e-08	25	65	10439	122817
OVER	GO:0006026	aminoglycan catabolic process	BIOLOGICAL_PROCESS	6.37737e-07	1.66479e-08	25	65	10439	122817
OVER	GO:0006032	chitin catabolic process	BIOLOGICAL_PROCESS	6.37737e-07	1.66479e-08	25	65	10439	122817
OVER	GO:0006030	chitin metabolic process	BIOLOGICAL_PROCESS	6.37737e-07	1.66479e-08	25	65	10439	122817
OVER	GO:0006022	aminoglycan metabolic process	BIOLOGICAL_PROCESS	8.76807e-06	2.95275e-07	25	78	10439	122804
OVER	GO:0050778	positive regulation of immune response	BIOLOGICAL_PROCESS	0.000114151	5.03094e-06	25	94	10439	122788
OVER	GO:0045089	positive regulation of innate immune response	BIOLOGICAL_PROCESS	0.000114151	5.03094e-06	25	94	10439	122788
OVER	GO:0002684	positive regulation of immune system process	BIOLOGICAL_PROCESS	0.000114151	5.03094e-06	25	94	10439	122788
OVER	GO:0006534	cysteine metabolic process	BIOLOGICAL_PROCESS	0.00103931	6.23654e-05	25	112	10439	122770
OVER	GO:0009809	lignin biosynthetic process	BIOLOGICAL_PROCESS	0.00103931	6.23654e-05	25	112	10439	122770
OVER	GO:0043650	dicarboxylic acid biosynthetic process	BIOLOGICAL_PROCESS	0.00116015	7.05348e-05	25	113	10439	122769
OVER	GO:0072503	cellular divalent inorganic cation homeostasis	BIOLOGICAL_PROCESS	0.00353938	0.000247585	25	124	10439	122758
OVER	GO:2000022	regulation of jasmonic acid mediated signaling pathway	BIOLOGICAL_PROCESS	1.64093e-06	4.7064e-08	24	64	10440	122818
OVER	GO:0032515	negative regulation of phosphoprotein phosphatase activity	BIOLOGICAL_PROCESS	2.15737e-05	7.65525e-07	24	77	10440	122805
OVER	GO:0035308	negative regulation of protein dephosphorylation	BIOLOGICAL_PROCESS	2.51555e-05	9.26736e-07	24	78	10440	122804
OVER	GO:0048528	post-embryonic root development	BIOLOGICAL_PROCESS	0.000312839	1.59088e-05	24	95	10440	122787
OVER	GO:0009873	ethylene-activated signaling pathway	BIOLOGICAL_PROCESS	0.000934125	5.53149e-05	24	104	10440	122778
OVER	GO:0071369	cellular response to ethylene stimulus	BIOLOGICAL_PROCESS	0.00248489	0.000166603	24	113	10440	122769
OVER	GO:0046189	phenol-containing compound biosynthetic process	BIOLOGICAL_PROCESS	0.00540543	0.000400108	24	121	10440	122761
OVER	GO:0046351	disaccharide biosynthetic process	BIOLOGICAL_PROCESS	0.00699582	0.000581442	23	117	10441	122765
OVER	GO:0019321	pentose metabolic process	BIOLOGICAL_PROCESS	4.14843e-05	1.59393e-06	22	69	10442	122813
OVER	GO:0080142	regulation of salicylic acid biosynthetic process	BIOLOGICAL_PROCESS	9.73696e-05	4.11967e-06	22	74	10442	122808
OVER	GO:0015718	monocarboxylic acid transport	BIOLOGICAL_PROCESS	9.73696e-05	4.11967e-06	22	74	10442	122808
OVER	GO:0009697	salicylic acid biosynthetic process	BIOLOGICAL_PROCESS	0.000207395	9.86704e-06	22	79	10442	122803
OVER	GO:0048527	lateral root development	BIOLOGICAL_PROCESS	0.00041316	2.20844e-05	22	84	10442	122798
OVER	GO:0009816	defense response to bacterium, incompatible interaction	BIOLOGICAL_PROCESS	5.35323e-08	1.14941e-09	21	37	10443	122845
OVER	GO:0018202	peptidyl-histidine modification	BIOLOGICAL_PROCESS	2.33417e-06	6.91099e-08	21	50	10443	122832
OVER	GO:0009690	cytokinin metabolic process	BIOLOGICAL_PROCESS	0.00458145	0.000330886	21	97	10443	122785
OVER	GO:0009627	systemic acquired resistance	BIOLOGICAL_PROCESS	0.0085845	0.000730493	21	104	10443	122778
OVER	GO:0080163	regulation of protein serine/threonine phosphatase activity	BIOLOGICAL_PROCESS	2.00923e-05	7.06149e-07	20	54	10444	122828
OVER	GO:1901002	positive regulation of response to salt stress	BIOLOGICAL_PROCESS	9.62574e-05	4.03565e-06	20	62	10444	122820
OVER	GO:0019344	cysteine biosynthetic process	BIOLOGICAL_PROCESS	0.000406596	2.13659e-05	20	71	10444	122811
OVER	GO:0072525	pyridine-containing compound biosynthetic process	BIOLOGICAL_PROCESS	0.00160815	0.000102088	20	81	10444	122801
OVER	GO:0031407	oxylipin metabolic process	BIOLOGICAL_PROCESS	0.0046234	0.000339088	20	90	10444	122792
OVER	GO:0031408	oxylipin biosynthetic process	BIOLOGICAL_PROCESS	0.0046234	0.000339088	20	90	10444	122792
OVER	GO:0072524	pyridine-containing compound metabolic process	BIOLOGICAL_PROCESS	0.0059751	0.000487515	20	93	10444	122789
OVER	GO:0072523	purine-containing compound catabolic process	BIOLOGICAL_PROCESS	5.08334e-05	1.97037e-06	19	53	10445	122829
OVER	GO:0045324	late endosome to vacuole transport	BIOLOGICAL_PROCESS	9.3066e-05	3.81772e-06	19	56	10445	122826
OVER	GO:0009695	jasmonic acid biosynthetic process	BIOLOGICAL_PROCESS	0.000762035	4.40911e-05	19	69	10445	122813
OVER	GO:0018106	peptidyl-histidine phosphorylation	BIOLOGICAL_PROCESS	5.29526e-07	1.34042e-08	18	31	10446	122851
OVER	GO:0032509	endosome transport via multivesicular body sorting pathway	BIOLOGICAL_PROCESS	1.9008e-06	5.52046e-08	18	35	10446	122847
OVER	GO:0071985	multivesicular body sorting pathway	BIOLOGICAL_PROCESS	1.9008e-06	5.52046e-08	18	35	10446	122847
OVER	GO:0006526	arginine biosynthetic process	BIOLOGICAL_PROCESS	2.57136e-06	7.67135e-08	18	36	10446	122846
OVER	GO:0046417	chorismate metabolic process	BIOLOGICAL_PROCESS	3.50025e-05	1.32906e-06	18	46	10446	122836
OVER	GO:0070482	response to oxygen levels	BIOLOGICAL_PROCESS	4.41995e-05	1.70325e-06	18	47	10446	122835
OVER	GO:0009083	branched-chain amino acid catabolic process	BIOLOGICAL_PROCESS	5.56652e-05	2.17025e-06	18	48	10446	122834
OVER	GO:0046219	indolalkylamine biosynthetic process	BIOLOGICAL_PROCESS	0.0004902	2.7064e-05	18	60	10446	122822
OVER	GO:0000162	tryptophan biosynthetic process	BIOLOGICAL_PROCESS	0.0004902	2.7064e-05	18	60	10446	122822
OVER	GO:0006641	triglyceride metabolic process	BIOLOGICAL_PROCESS	0.00592922	0.000446908	18	78	10446	122804
OVER	GO:0006638	neutral lipid metabolic process	BIOLOGICAL_PROCESS	0.00868019	0.000741578	18	82	10446	122800
OVER	GO:0006639	acylglycerol metabolic process	BIOLOGICAL_PROCESS	0.00868019	0.000741578	18	82	10446	122800
OVER	GO:0043562	cellular response to nitrogen levels	BIOLOGICAL_PROCESS	0.000689394	3.95765e-05	17	56	10447	122826
OVER	GO:0010311	lateral root formation	BIOLOGICAL_PROCESS	0.000962874	5.71261e-05	17	58	10447	122824
OVER	GO:0010102	lateral root morphogenesis	BIOLOGICAL_PROCESS	0.0015326	9.62966e-05	17	61	10447	122821
OVER	GO:0006535	cysteine biosynthetic process from serine	BIOLOGICAL_PROCESS	0.00177591	0.000113792	17	62	10447	122820
OVER	GO:0010101	post-embryonic root morphogenesis	BIOLOGICAL_PROCESS	0.00269202	0.000184052	17	65	10447	122817
OVER	GO:0005991	trehalose metabolic process	BIOLOGICAL_PROCESS	0.00458145	0.000334658	17	69	10447	122813
OVER	GO:0070574	cadmium ion transmembrane transport	BIOLOGICAL_PROCESS	0.00699582	0.000581865	17	73	10447	122809
OVER	GO:0015691	cadmium ion transport	BIOLOGICAL_PROCESS	0.00994841	0.000857796	17	76	10447	122806
OVER	GO:0042762	regulation of sulfur metabolic process	BIOLOGICAL_PROCESS	2.29752e-07	5.29657e-09	16	21	10448	122861
OVER	GO:0036293	response to decreased oxygen levels	BIOLOGICAL_PROCESS	0.000145405	6.68772e-06	16	42	10448	122840
OVER	GO:0019363	pyridine nucleotide biosynthetic process	BIOLOGICAL_PROCESS	0.000221404	1.07587e-05	16	44	10448	122838
OVER	GO:0019362	pyridine nucleotide metabolic process	BIOLOGICAL_PROCESS	0.00115068	6.98288e-05	16	53	10448	122829
OVER	GO:0000422	autophagy of mitochondrion	BIOLOGICAL_PROCESS	0.00288466	0.000198852	16	59	10448	122823
OVER	GO:0061726	mitochondrion disassembly	BIOLOGICAL_PROCESS	0.00288466	0.000198852	16	59	10448	122823
OVER	GO:0010029	regulation of seed germination	BIOLOGICAL_PROCESS	0.00386246	0.000273676	16	61	10448	122821
OVER	GO:1900140	regulation of seedling development	BIOLOGICAL_PROCESS	0.00577128	0.000431101	16	64	10448	122818
OVER	GO:0055073	cadmium ion homeostasis	BIOLOGICAL_PROCESS	0.000296728	1.4989e-05	15	40	10449	122842
OVER	GO:0010252	auxin homeostasis	BIOLOGICAL_PROCESS	0.00260263	0.000177142	15	52	10449	122830
OVER	GO:0006144	purine nucleobase metabolic process	BIOLOGICAL_PROCESS	0.00547225	0.000407528	15	57	10449	122825
OVER	GO:0061408	positive regulation of transcription from RNA polymerase II promoter in response to heat stress	BIOLOGICAL_PROCESS	0.00592922	0.00047608	15	58	10449	122824
OVER	GO:0036003	positive regulation of transcription from RNA polymerase II promoter in response to stress	BIOLOGICAL_PROCESS	0.00592922	0.00047608	15	58	10449	122824
OVER	GO:0006551	leucine metabolic process	BIOLOGICAL_PROCESS	9.52448e-05	3.97167e-06	14	30	10450	122852
OVER	GO:0006995	cellular response to nitrogen starvation	BIOLOGICAL_PROCESS	0.00159701	0.000100524	14	43	10450	122839
OVER	GO:0040011	locomotion	BIOLOGICAL_PROCESS	0.00727826	0.000607824	14	53	10450	122829
OVER	GO:0006596	polyamine biosynthetic process	BIOLOGICAL_PROCESS	0.00962783	0.000827978	14	55	10450	122827
OVER	GO:0006521	regulation of cellular amino acid metabolic process	BIOLOGICAL_PROCESS	3.16722e-05	1.19903e-06	13	22	10451	122860
OVER	GO:0033238	regulation of cellular amine metabolic process	BIOLOGICAL_PROCESS	3.16722e-05	1.19903e-06	13	22	10451	122860
OVER	GO:0010200	response to chitin	BIOLOGICAL_PROCESS	0.000506599	2.81094e-05	13	32	10451	122850
OVER	GO:0009772	photosynthetic electron transport in photosystem II	BIOLOGICAL_PROCESS	0.000995737	5.94274e-05	13	35	10451	122847
OVER	GO:0043173	nucleotide salvage	BIOLOGICAL_PROCESS	0.00446205	0.000321707	13	43	10451	122839
OVER	GO:0019359	nicotinamide nucleotide biosynthetic process	BIOLOGICAL_PROCESS	0.00524512	0.000387057	13	44	10451	122838
OVER	GO:0009625	response to insect	BIOLOGICAL_PROCESS	6.96754e-05	2.74481e-06	12	20	10452	122862
OVER	GO:0009635	response to herbicide	BIOLOGICAL_PROCESS	0.0024931	0.000167777	12	34	10452	122848
OVER	GO:0006787	porphyrin-containing compound catabolic process	BIOLOGICAL_PROCESS	0.00810123	0.000687538	12	41	10452	122841
OVER	GO:0033015	tetrapyrrole catabolic process	BIOLOGICAL_PROCESS	0.00810123	0.000687538	12	41	10452	122841
OVER	GO:0002213	defense response to insect	BIOLOGICAL_PROCESS	2.91212e-05	1.08929e-06	11	14	10453	122868
OVER	GO:0042732	D-xylose metabolic process	BIOLOGICAL_PROCESS	6.96754e-05	2.74822e-06	11	16	10453	122866
OVER	GO:0009395	phospholipid catabolic process	BIOLOGICAL_PROCESS	9.86814e-05	4.20419e-06	11	17	10453	122865
OVER	GO:0046113	nucleobase catabolic process	BIOLOGICAL_PROCESS	0.000137805	6.29146e-06	11	18	10453	122864
OVER	GO:1903409	reactive oxygen species biosynthetic process	BIOLOGICAL_PROCESS	0.000196284	9.22751e-06	11	19	10453	122863
OVER	GO:0097501	stress response to metal ion	BIOLOGICAL_PROCESS	0.000268425	1.32863e-05	11	20	10453	122862
OVER	GO:0001666	response to hypoxia	BIOLOGICAL_PROCESS	0.000268425	1.32863e-05	11	20	10453	122862
OVER	GO:0061687	detoxification of inorganic compound	BIOLOGICAL_PROCESS	0.000268425	1.32863e-05	11	20	10453	122862
OVER	GO:0006573	valine metabolic process	BIOLOGICAL_PROCESS	0.000480187	2.62098e-05	11	22	10453	122860
OVER	GO:0080113	regulation of seed growth	BIOLOGICAL_PROCESS	0.000480187	2.62098e-05	11	22	10453	122860
OVER	GO:0006591	ornithine metabolic process	BIOLOGICAL_PROCESS	0.000838083	4.87753e-05	11	24	10453	122858
OVER	GO:0009423	chorismate biosynthetic process	BIOLOGICAL_PROCESS	0.00176462	0.000112869	11	27	10453	122855
OVER	GO:0046149	pigment catabolic process	BIOLOGICAL_PROCESS	0.00417472	0.000299576	11	31	10453	122851
OVER	GO:0080112	seed growth	BIOLOGICAL_PROCESS	0.00417472	0.000299576	11	31	10453	122851
OVER	GO:0015996	chlorophyll catabolic process	BIOLOGICAL_PROCESS	0.00417472	0.000299576	11	31	10453	122851
OVER	GO:0046049	UMP metabolic process	BIOLOGICAL_PROCESS	0.00592922	0.000463786	11	33	10453	122849
OVER	GO:0009174	pyrimidine ribonucleoside monophosphate biosynthetic process	BIOLOGICAL_PROCESS	0.00592922	0.000463786	11	33	10453	122849
OVER	GO:0009173	pyrimidine ribonucleoside monophosphate metabolic process	BIOLOGICAL_PROCESS	0.00592922	0.000463786	11	33	10453	122849
OVER	GO:0006222	UMP biosynthetic process	BIOLOGICAL_PROCESS	0.00592922	0.000463786	11	33	10453	122849
OVER	GO:0010230	alternative respiration	BIOLOGICAL_PROCESS	6.95338e-07	1.83087e-08	10	5	10454	122877
OVER	GO:0019499	cyanide metabolic process	BIOLOGICAL_PROCESS	1.59263e-06	4.53546e-08	10	6	10454	122876
OVER	GO:0046503	glycerolipid catabolic process	BIOLOGICAL_PROCESS	3.63159e-05	1.38303e-06	10	11	10454	122871
OVER	GO:0031335	regulation of sulfur amino acid metabolic process	BIOLOGICAL_PROCESS	9.34058e-05	3.87387e-06	10	13	10454	122869
OVER	GO:0010364	regulation of ethylene biosynthetic process	BIOLOGICAL_PROCESS	9.34058e-05	3.87387e-06	10	13	10454	122869
OVER	GO:1900911	regulation of olefin biosynthetic process	BIOLOGICAL_PROCESS	9.34058e-05	3.87387e-06	10	13	10454	122869
OVER	GO:1900908	regulation of olefin metabolic process	BIOLOGICAL_PROCESS	9.34058e-05	3.87387e-06	10	13	10454	122869
OVER	GO:2000031	regulation of salicylic acid mediated signaling pathway	BIOLOGICAL_PROCESS	0.000136194	6.17174e-06	10	14	10454	122868
OVER	GO:0042436	indole-containing compound catabolic process	BIOLOGICAL_PROCESS	0.000201902	9.56005e-06	10	15	10454	122867
OVER	GO:0006569	tryptophan catabolic process	BIOLOGICAL_PROCESS	0.000201902	9.56005e-06	10	15	10454	122867
OVER	GO:0046218	indolalkylamine catabolic process	BIOLOGICAL_PROCESS	0.000201902	9.56005e-06	10	15	10454	122867
OVER	GO:0072531	pyrimidine-containing compound transmembrane transport	BIOLOGICAL_PROCESS	0.000287775	1.44391e-05	10	16	10454	122866
OVER	GO:0010310	regulation of hydrogen peroxide metabolic process	BIOLOGICAL_PROCESS	0.000287775	1.44391e-05	10	16	10454	122866
OVER	GO:0009446	putrescine biosynthetic process	BIOLOGICAL_PROCESS	0.00458145	0.000333537	10	26	10454	122856
OVER	GO:0009445	putrescine metabolic process	BIOLOGICAL_PROCESS	0.00458145	0.000333537	10	26	10454	122856
OVER	GO:0009435	NAD biosynthetic process	BIOLOGICAL_PROCESS	0.00794142	0.000671283	10	29	10454	122853
OVER	GO:2000068	regulation of defense response to insect	BIOLOGICAL_PROCESS	4.92122e-06	1.56273e-07	9	5	10455	122877
OVER	GO:0080027	response to herbivore	BIOLOGICAL_PROCESS	1.06782e-05	3.6322e-07	9	6	10455	122876
OVER	GO:0048639	positive regulation of developmental growth	BIOLOGICAL_PROCESS	2.16844e-05	7.71905e-07	9	7	10455	122875
OVER	GO:1990170	stress response to cadmium ion	BIOLOGICAL_PROCESS	0.000114151	5.01168e-06	9	10	10455	122872
OVER	GO:0071585	detoxification of cadmium ion	BIOLOGICAL_PROCESS	0.000114151	5.01168e-06	9	10	10455	122872
OVER	GO:0035436	triose phosphate transmembrane transport	BIOLOGICAL_PROCESS	0.000407021	2.17103e-05	9	13	10455	122869
OVER	GO:0015717	triose phosphate transport	BIOLOGICAL_PROCESS	0.000407021	2.17103e-05	9	13	10455	122869
OVER	GO:0015713	phosphoglycerate transmembrane transport	BIOLOGICAL_PROCESS	0.000407021	2.17103e-05	9	13	10455	122869
OVER	GO:0042873	aldonate transmembrane transport	BIOLOGICAL_PROCESS	0.00117622	7.17777e-05	9	16	10455	122866
OVER	GO:0043605	cellular amide catabolic process	BIOLOGICAL_PROCESS	0.00592922	0.000459832	9	22	10455	122860
OVER	GO:0015866	ADP transport	BIOLOGICAL_PROCESS	0.00714	0.00059547	9	23	10455	122859
OVER	GO:0006574	valine catabolic process	BIOLOGICAL_PROCESS	6.96754e-05	2.7952e-06	8	6	10456	122876
OVER	GO:0015720	allantoin transport	BIOLOGICAL_PROCESS	0.000214554	1.03773e-05	8	8	10456	122874
OVER	GO:0006527	arginine catabolic process	BIOLOGICAL_PROCESS	0.000843121	4.91638e-05	8	11	10456	122871
OVER	GO:1903791	uracil transmembrane transport	BIOLOGICAL_PROCESS	0.00122968	7.62902e-05	8	12	10456	122870
OVER	GO:1904082	pyrimidine nucleobase transmembrane transport	BIOLOGICAL_PROCESS	0.00122968	7.62902e-05	8	12	10456	122870
OVER	GO:0015857	uracil transport	BIOLOGICAL_PROCESS	0.00122968	7.62902e-05	8	12	10456	122870
OVER	GO:0015855	pyrimidine nucleobase transport	BIOLOGICAL_PROCESS	0.00122968	7.62902e-05	8	12	10456	122870
OVER	GO:0009938	negative regulation of gibberellic acid mediated signaling pathway	BIOLOGICAL_PROCESS	0.00458145	0.000334976	8	16	10456	122866
OVER	GO:0000256	allantoin catabolic process	BIOLOGICAL_PROCESS	0.00736264	0.000617367	8	18	10456	122864
OVER	GO:1900458	negative regulation of brassinosteroid mediated signaling pathway	BIOLOGICAL_PROCESS	0.00951608	0.000817293	8	19	10456	122863
OVER	GO:0030574	collagen catabolic process	BIOLOGICAL_PROCESS	1.64653e-05	5.71233e-07	7	2	10457	122880
OVER	GO:1901522	positive regulation of transcription from RNA polymerase II promoter involved in cellular response to chemical stimulus	BIOLOGICAL_PROCESS	0.000105268	4.54428e-06	7	4	10457	122878
OVER	GO:0006990	positive regulation of transcription from RNA polymerase II promoter involved in unfolded protein response	BIOLOGICAL_PROCESS	0.000105268	4.54428e-06	7	4	10457	122878
OVER	GO:0046622	positive regulation of organ growth	BIOLOGICAL_PROCESS	0.000105268	4.54428e-06	7	4	10457	122878
OVER	GO:0032963	collagen metabolic process	BIOLOGICAL_PROCESS	0.000212573	1.01614e-05	7	5	10457	122877
OVER	GO:0050665	hydrogen peroxide biosynthetic process	BIOLOGICAL_PROCESS	0.00110921	6.68111e-05	7	8	10457	122874
OVER	GO:0033388	putrescine biosynthetic process from arginine	BIOLOGICAL_PROCESS	0.00378406	0.000267603	7	11	10457	122871
OVER	GO:1903034	regulation of response to wounding	BIOLOGICAL_PROCESS	7.01907e-06	2.33202e-07	6	0	10458	122882
OVER	GO:0010728	regulation of hydrogen peroxide biosynthetic process	BIOLOGICAL_PROCESS	7.01907e-06	2.33202e-07	6	0	10458	122882
OVER	GO:0009871	jasmonic acid and ethylene-dependent systemic resistance, ethylene mediated signaling pathway	BIOLOGICAL_PROCESS	7.01907e-06	2.33202e-07	6	0	10458	122882
OVER	GO:0009861	jasmonic acid and ethylene-dependent systemic resistance	BIOLOGICAL_PROCESS	7.01907e-06	2.33202e-07	6	0	10458	122882
OVER	GO:1903426	regulation of reactive oxygen species biosynthetic process	BIOLOGICAL_PROCESS	3.97467e-05	1.52267e-06	6	1	10458	122881
OVER	GO:0046874	quinolinate metabolic process	BIOLOGICAL_PROCESS	3.97467e-05	1.52267e-06	6	1	10458	122881
OVER	GO:0090354	regulation of auxin metabolic process	BIOLOGICAL_PROCESS	0.000127288	5.68185e-06	6	2	10458	122880
OVER	GO:0032350	regulation of hormone metabolic process	BIOLOGICAL_PROCESS	0.000127288	5.68185e-06	6	2	10458	122880
OVER	GO:1902347	response to strigolactone	BIOLOGICAL_PROCESS	0.000651333	3.70971e-05	6	4	10458	122878
OVER	GO:0009413	response to flooding	BIOLOGICAL_PROCESS	0.000651333	3.70971e-05	6	4	10458	122878
OVER	GO:0051176	positive regulation of sulfur metabolic process	BIOLOGICAL_PROCESS	0.00122968	7.61604e-05	6	5	10458	122877
OVER	GO:0006145	purine nucleobase catabolic process	BIOLOGICAL_PROCESS	0.0021467	0.000142159	6	6	10458	122876
OVER	GO:0080140	regulation of jasmonic acid metabolic process	BIOLOGICAL_PROCESS	0.0021467	0.000142159	6	6	10458	122876
OVER	GO:0080141	regulation of jasmonic acid biosynthetic process	BIOLOGICAL_PROCESS	0.0021467	0.000142159	6	6	10458	122876
OVER	GO:0019627	urea metabolic process	BIOLOGICAL_PROCESS	0.00352852	0.000246426	6	7	10458	122875
OVER	GO:0010120	camalexin biosynthetic process	BIOLOGICAL_PROCESS	0.0054139	0.000402571	6	8	10458	122874
OVER	GO:0009838	abscission	BIOLOGICAL_PROCESS	0.0054139	0.000402571	6	8	10458	122874
OVER	GO:0052317	camalexin metabolic process	BIOLOGICAL_PROCESS	0.0054139	0.000402571	6	8	10458	122874
OVER	GO:0042447	hormone catabolic process	BIOLOGICAL_PROCESS	0.00208555	0.000135989	5	3	10459	122879
OVER	GO:0009852	auxin catabolic process	BIOLOGICAL_PROCESS	0.00208555	0.000135989	5	3	10459	122879
OVER	GO:0000050	urea cycle	BIOLOGICAL_PROCESS	0.00208555	0.000135989	5	3	10459	122879
OVER	GO:0046475	glycerophospholipid catabolic process	BIOLOGICAL_PROCESS	0.00401851	0.000286096	5	4	10459	122878
OVER	GO:1901672	positive regulation of systemic acquired resistance	BIOLOGICAL_PROCESS	0.00647749	0.000535094	5	5	10459	122877
OVER	GO:0034552	respiratory chain complex II assembly	BIOLOGICAL_PROCESS	0.00647749	0.000535094	5	5	10459	122877
OVER	GO:0034553	mitochondrial respiratory chain complex II assembly	BIOLOGICAL_PROCESS	0.00647749	0.000535094	5	5	10459	122877
OVER	GO:0005997	xylulose metabolic process	BIOLOGICAL_PROCESS	0.00608803	0.000499481	4	2	10460	122880
OVER	GO:0036498	IRE1-mediated unfolded protein response	BIOLOGICAL_PROCESS	0.00592922	0.000483102	3	0	10461	122882
OVER	GO:1902457	negative regulation of stomatal opening	BIOLOGICAL_PROCESS	0.00592922	0.000483102	3	0	10461	122882
OVER	GO:1902395	regulation of 1-deoxy-D-xylulose-5-phosphate synthase activity	BIOLOGICAL_PROCESS	0.00592922	0.000483102	3	0	10461	122882
OVER	GO:0006524	alanine catabolic process	BIOLOGICAL_PROCESS	0.00592922	0.000483102	3	0	10461	122882
OVER	GO:0019805	quinolinate biosynthetic process	BIOLOGICAL_PROCESS	0.00592922	0.000483102	3	0	10461	122882
OVER	GO:0090357	regulation of tryptophan metabolic process	BIOLOGICAL_PROCESS	0.00592922	0.000483102	3	0	10461	122882
OVER	GO:0090356	negative regulation of auxin metabolic process	BIOLOGICAL_PROCESS	0.00592922	0.000483102	3	0	10461	122882
OVER	GO:0070059	intrinsic apoptotic signaling pathway in response to endoplasmic reticulum stress	BIOLOGICAL_PROCESS	0.00592922	0.000483102	3	0	10461	122882
OVER	GO:0042851	L-alanine metabolic process	BIOLOGICAL_PROCESS	0.00592922	0.000483102	3	0	10461	122882
OVER	GO:0042853	L-alanine catabolic process	BIOLOGICAL_PROCESS	0.00592922	0.000483102	3	0	10461	122882
OVER	GO:0009080	pyruvate family amino acid catabolic process	BIOLOGICAL_PROCESS	0.00592922	0.000483102	3	0	10461	122882
OVER	GO:0034628	'de novo' NAD biosynthetic process from aspartate	BIOLOGICAL_PROCESS	0.00592922	0.000483102	3	0	10461	122882
OVER	GO:0034627	'de novo' NAD biosynthetic process	BIOLOGICAL_PROCESS	0.00592922	0.000483102	3	0	10461	122882
OVER	GO:0009848	indoleacetic acid biosynthetic process via tryptophan	BIOLOGICAL_PROCESS	0.00592922	0.000483102	3	0	10461	122882
OVER	GO:1901996	regulation of indoleacetic acid biosynthetic process via tryptophan	BIOLOGICAL_PROCESS	0.00592922	0.000483102	3	0	10461	122882
OVER	GO:1901997	negative regulation of indoleacetic acid biosynthetic process via tryptophan	BIOLOGICAL_PROCESS	0.00592922	0.000483102	3	0	10461	122882
OVER	GO:0071492	cellular response to UV-A	BIOLOGICAL_PROCESS	0.00592922	0.000483102	3	0	10461	122882
OVER	GO:0070141	response to UV-A	BIOLOGICAL_PROCESS	0.00592922	0.000483102	3	0	10461	122882
OVER	GO:0022417	protein maturation by protein folding	BIOLOGICAL_PROCESS	0.00592922	0.000483102	3	0	10461	122882
OVER	GO:0009641	shade avoidance	BIOLOGICAL_PROCESS	0.00592922	0.000483102	3	0	10461	122882
OVER	GO:0010600	regulation of auxin biosynthetic process	BIOLOGICAL_PROCESS	0.00592922	0.000483102	3	0	10461	122882
OVER	GO:0060860	regulation of floral organ abscission	BIOLOGICAL_PROCESS	0.00592922	0.000483102	3	0	10461	122882
OVER	GO:0060862	negative regulation of floral organ abscission	BIOLOGICAL_PROCESS	0.00592922	0.000483102	3	0	10461	122882
OVER	GO:0046885	regulation of hormone biosynthetic process	BIOLOGICAL_PROCESS	0.00592922	0.000483102	3	0	10461	122882
OVER	GO:0051571	positive regulation of histone H3-K4 methylation	BIOLOGICAL_PROCESS	0.00592922	0.000483102	3	0	10461	122882
OVER	GO:0019355	nicotinamide nucleotide biosynthetic process from aspartate	BIOLOGICAL_PROCESS	0.00592922	0.000483102	3	0	10461	122882
OVER	GO:0032353	negative regulation of hormone biosynthetic process	BIOLOGICAL_PROCESS	0.00592922	0.000483102	3	0	10461	122882
OVER	GO:0032351	negative regulation of hormone metabolic process	BIOLOGICAL_PROCESS	0.00592922	0.000483102	3	0	10461	122882
OVER	GO:0043048	dolichyl monophosphate biosynthetic process	BIOLOGICAL_PROCESS	0.00592922	0.000483102	3	0	10461	122882
OVER	GO:0110165	cellular anatomical entity	CELLULAR_COMPONENT	2.95621e-17	2.47214e-19	5632	60557	4832	62325
OVER	GO:0016020	membrane	CELLULAR_COMPONENT	4.24224e-19	2.68466e-21	3794	39003	6670	83879
OVER	GO:0031224	intrinsic component of membrane	CELLULAR_COMPONENT	5.61618e-27	1.39627e-29	3164	30915	7300	91967
OVER	GO:0016021	integral component of membrane	CELLULAR_COMPONENT	9.80348e-27	2.54809e-29	3128	30545	7336	92337
OVER	GO:0005737	cytoplasm	CELLULAR_COMPONENT	0.00668006	0.000553338	1982	21698	8482	101184
OVER	GO:0071944	cell periphery	CELLULAR_COMPONENT	1.03329e-23	4.32047e-26	1059	8829	9405	114053
OVER	GO:0005886	plasma membrane	CELLULAR_COMPONENT	4.10361e-25	1.53553e-27	957	7724	9507	115158
OVER	GO:0031226	intrinsic component of plasma membrane	CELLULAR_COMPONENT	2.89464e-12	4.15436e-14	212	1380	10252	121502
OVER	GO:0005789	endoplasmic reticulum membrane	CELLULAR_COMPONENT	0.000100354	4.28677e-06	180	1462	10284	121420
OVER	GO:0042175	nuclear outer membrane-endoplasmic reticulum membrane network	CELLULAR_COMPONENT	0.000106447	4.60764e-06	180	1464	10284	121418
OVER	GO:0005887	integral component of plasma membrane	CELLULAR_COMPONENT	9.5986e-15	1.01963e-16	147	766	10317	122116
OVER	GO:0005777	peroxisome	CELLULAR_COMPONENT	1.17093e-10	1.90545e-12	97	485	10367	122397
OVER	GO:0042579	microbody	CELLULAR_COMPONENT	1.17093e-10	1.90545e-12	97	485	10367	122397
OVER	GO:0031461	cullin-RING ubiquitin ligase complex	CELLULAR_COMPONENT	0.00223289	0.000148876	54	357	10410	122525
OVER	GO:0019005	SCF ubiquitin ligase complex	CELLULAR_COMPONENT	0.000656518	3.74666e-05	38	205	10426	122677
OVER	GO:0010369	chromocenter	CELLULAR_COMPONENT	6.71543e-09	1.31288e-10	28	62	10436	122820
OVER	GO:0000407	phagophore assembly site	CELLULAR_COMPONENT	0.00506003	0.000371683	16	63	10448	122819
OVER	GO:0036452	ESCRT complex	CELLULAR_COMPONENT	0.000483305	2.64346e-05	14	37	10450	122845
OVER	GO:0031012	extracellular matrix	CELLULAR_COMPONENT	0.000278021	1.37927e-05	9	12	10455	122870
OVER	GO:0000815	ESCRT III complex	CELLULAR_COMPONENT	0.000352528	1.82459e-05	8	9	10456	122873
OVER	GO:0005782	peroxisomal matrix	CELLULAR_COMPONENT	0.00458145	0.000334976	8	16	10456	122866
OVER	GO:0031907	microbody lumen	CELLULAR_COMPONENT	0.00458145	0.000334976	8	16	10456	122866
OVER	GO:0019008	molybdopterin synthase complex	CELLULAR_COMPONENT	0.00745041	0.00062641	6	9	10458	122873
OVER	GO:1990604	IRE1-TRAF2-ASK1 complex	CELLULAR_COMPONENT	0.00592922	0.000483102	3	0	10461	122882
OVER	GO:0003824	catalytic activity	MOLECULAR_FUNCTION	2.34483e-70	2.64983e-74	5085	48454	5379	74428
OVER	GO:0005488	binding	MOLECULAR_FUNCTION	1.58969e-08	3.21567e-10	4693	51279	5771	71603
OVER	GO:0043167	ion binding	MOLECULAR_FUNCTION	6.30828e-31	5.70304e-34	3131	30094	7333	92788
OVER	GO:0016740	transferase activity	MOLECULAR_FUNCTION	5.06815e-39	1.14547e-42	2381	21237	8083	101645
OVER	GO:0043168	anion binding	MOLECULAR_FUNCTION	3.67481e-14	4.1528e-16	1887	18455	8577	104427
OVER	GO:0036094	small molecule binding	MOLECULAR_FUNCTION	5.13459e-09	9.98022e-11	1879	19113	8585	103769
OVER	GO:1901265	nucleoside phosphate binding	MOLECULAR_FUNCTION	1.86336e-05	6.5067e-07	1749	18339	8715	104543
OVER	GO:0000166	nucleotide binding	MOLECULAR_FUNCTION	1.86336e-05	6.5067e-07	1749	18339	8715	104543
OVER	GO:0140096	catalytic activity, acting on a protein	MOLECULAR_FUNCTION	6.50011e-21	3.59934e-23	1608	14715	8856	108167
OVER	GO:0097367	carbohydrate derivative binding	MOLECULAR_FUNCTION	9.03321e-05	3.69536e-06	1589	16700	8875	106182
OVER	GO:0032553	ribonucleotide binding	MOLECULAR_FUNCTION	0.000556262	3.11793e-05	1558	16554	8906	106328
OVER	GO:0043169	cation binding	MOLECULAR_FUNCTION	5.52177e-19	3.5568e-21	1492	13676	8972	109206
OVER	GO:0046872	metal ion binding	MOLECULAR_FUNCTION	1.25353e-18	8.35783e-21	1478	13563	8986	109319
OVER	GO:0030554	adenyl nucleotide binding	MOLECULAR_FUNCTION	0.000619808	3.48813e-05	1448	15328	9016	107554
OVER	GO:0032559	adenyl ribonucleotide binding	MOLECULAR_FUNCTION	0.000497481	2.75472e-05	1447	15294	9017	107588
OVER	GO:0035639	purine ribonucleoside triphosphate binding	MOLECULAR_FUNCTION	5.71482e-07	1.45309e-08	1338	13484	9126	109398
OVER	GO:0005524	ATP binding	MOLECULAR_FUNCTION	3.301e-10	5.63286e-12	1281	12397	9183	110485
OVER	GO:0016772	transferase activity, transferring phosphorus-containing groups	MOLECULAR_FUNCTION	1.57988e-15	1.55328e-17	1147	10393	9317	112489
OVER	GO:0016301	kinase activity	MOLECULAR_FUNCTION	1.51216e-20	8.71515e-23	1094	9416	9370	113466
OVER	GO:0016491	oxidoreductase activity	MOLECULAR_FUNCTION	9.9348e-27	2.75961e-29	1031	8346	9433	114536
OVER	GO:0016773	phosphotransferase activity, alcohol group as acceptor	MOLECULAR_FUNCTION	3.17126e-22	1.50517e-24	968	8023	9496	114859
OVER	GO:0004672	protein kinase activity	MOLECULAR_FUNCTION	1.31123e-21	6.81619e-24	891	7301	9573	115581
OVER	GO:0005215	transporter activity	MOLECULAR_FUNCTION	9.94486e-32	7.86688e-35	756	5422	9708	117460
OVER	GO:0022857	transmembrane transporter activity	MOLECULAR_FUNCTION	5.33677e-33	3.01547e-36	726	5085	9738	117797
OVER	GO:0046914	transition metal ion binding	MOLECULAR_FUNCTION	5.21903e-06	1.6691e-07	615	5809	9849	117073
OVER	GO:0004674	protein serine/threonine kinase activity	MOLECULAR_FUNCTION	2.02605e-21	1.099e-23	613	4619	9851	118263
OVER	GO:0098772	molecular function regulator	MOLECULAR_FUNCTION	2.03388e-06	5.92994e-08	583	5423	9881	117459
OVER	GO:0140110	transcription regulator activity	MOLECULAR_FUNCTION	5.11444e-15	5.25951e-17	428	3218	10036	119664
OVER	GO:0015075	ion transmembrane transporter activity	MOLECULAR_FUNCTION	1.43719e-18	9.74477e-21	409	2867	10055	120015
OVER	GO:0015318	inorganic molecular entity transmembrane transporter activity	MOLECULAR_FUNCTION	1.97099e-18	1.42551e-20	407	2856	10057	120026
OVER	GO:0003700	DNA-binding transcription factor activity	MOLECULAR_FUNCTION	3.4035e-17	2.88465e-19	394	2795	10070	120087
OVER	GO:0016757	transferase activity, transferring glycosyl groups	MOLECULAR_FUNCTION	3.86534e-07	9.39143e-09	382	3280	10082	119602
OVER	GO:0022804	active transmembrane transporter activity	MOLECULAR_FUNCTION	2.40866e-27	4.35513e-30	379	2266	10085	120616
OVER	GO:0046906	tetrapyrrole binding	MOLECULAR_FUNCTION	1.7807e-11	2.67639e-13	338	2563	10126	120319
OVER	GO:0020037	heme binding	MOLECULAR_FUNCTION	3.35301e-09	6.47943e-11	312	2447	10152	120435
OVER	GO:0008324	cation transmembrane transporter activity	MOLECULAR_FUNCTION	4.39355e-15	4.46853e-17	302	2058	10162	120824
OVER	GO:0022890	inorganic cation transmembrane transporter activity	MOLECULAR_FUNCTION	1.01733e-14	1.10367e-16	290	1967	10174	120915
OVER	GO:0043565	sequence-specific DNA binding	MOLECULAR_FUNCTION	0.000152952	7.08669e-06	289	2571	10175	120311
OVER	GO:0019787	ubiquitin-like protein transferase activity	MOLECULAR_FUNCTION	8.74974e-15	9.19568e-17	271	1796	10193	121086
OVER	GO:0005506	iron ion binding	MOLECULAR_FUNCTION	7.12016e-09	1.40005e-10	258	1952	10206	120930
OVER	GO:0016829	lyase activity	MOLECULAR_FUNCTION	1.01076e-08	2.01034e-10	255	1932	10209	120950
OVER	GO:0015291	secondary active transmembrane transporter activity	MOLECULAR_FUNCTION	9.9348e-27	2.80676e-29	254	1288	10210	121594
OVER	GO:0004842	ubiquitin-protein transferase activity	MOLECULAR_FUNCTION	7.31614e-13	9.67327e-15	254	1725	10210	121157
OVER	GO:0016758	transferase activity, transferring hexosyl groups	MOLECULAR_FUNCTION	2.97518e-05	1.1196e-06	254	2153	10210	120729
OVER	GO:0016798	hydrolase activity, acting on glycosyl bonds	MOLECULAR_FUNCTION	0.000813852	4.71812e-05	254	2285	10210	120597
OVER	GO:0016705	oxidoreductase activity, acting on paired donors, with incorporation or reduction of molecular oxygen	MOLECULAR_FUNCTION	3.16479e-06	9.62063e-08	250	2040	10214	120842
OVER	GO:0004497	monooxygenase activity	MOLECULAR_FUNCTION	6.41082e-07	1.68077e-08	235	1848	10229	121034
OVER	GO:0004553	hydrolase activity, hydrolyzing O-glycosyl compounds	MOLECULAR_FUNCTION	0.000292909	1.47299e-05	227	1967	10237	120915
OVER	GO:0016746	transferase activity, transferring acyl groups	MOLECULAR_FUNCTION	0.00270768	0.000185428	226	2051	10238	120831
OVER	GO:0042578	phosphoric ester hydrolase activity	MOLECULAR_FUNCTION	4.55994e-06	1.44286e-07	214	1701	10250	121181
OVER	GO:0008194	UDP-glycosyltransferase activity	MOLECULAR_FUNCTION	7.42485e-10	1.31425e-11	208	1443	10256	121439
OVER	GO:0015077	monovalent inorganic cation transmembrane transporter activity	MOLECULAR_FUNCTION	1.87718e-10	3.07595e-12	207	1408	10257	121474
OVER	GO:0022853	active ion transmembrane transporter activity	MOLECULAR_FUNCTION	1.37986e-16	1.30985e-18	198	1119	10266	121763
OVER	GO:0005509	calcium ion binding	MOLECULAR_FUNCTION	3.54284e-06	1.08499e-07	174	1313	10290	121569
OVER	GO:0016791	phosphatase activity	MOLECULAR_FUNCTION	0.00088809	5.20445e-05	164	1377	10300	121505
OVER	GO:0015078	proton transmembrane transporter activity	MOLECULAR_FUNCTION	4.03556e-07	9.85061e-09	163	1161	10301	121721
OVER	GO:0060089	molecular transducer activity	MOLECULAR_FUNCTION	1.05318e-09	1.91618e-11	156	992	10308	121890
OVER	GO:0038023	signaling receptor activity	MOLECULAR_FUNCTION	2.57764e-09	4.8937e-11	143	895	10321	121987
OVER	GO:0046873	metal ion transmembrane transporter activity	MOLECULAR_FUNCTION	5.43477e-11	8.4141e-13	137	790	10327	122092
OVER	GO:0016614	oxidoreductase activity, acting on CH-OH group of donors	MOLECULAR_FUNCTION	9.34605e-06	3.15795e-07	137	992	10327	121890
OVER	GO:0008289	lipid binding	MOLECULAR_FUNCTION	3.43931e-07	8.20087e-09	132	880	10332	122002
OVER	GO:0015293	symporter activity	MOLECULAR_FUNCTION	1.52057e-18	1.08062e-20	128	545	10336	122337
OVER	GO:0016209	antioxidant activity	MOLECULAR_FUNCTION	0.0004902	2.70887e-05	126	988	10338	121894
OVER	GO:0015399	primary active transmembrane transporter activity	MOLECULAR_FUNCTION	0.000485737	2.66225e-05	125	978	10339	121904
OVER	GO:0016765	transferase activity, transferring alkyl or aryl (other than methyl) groups	MOLECULAR_FUNCTION	4.33959e-13	5.54157e-15	122	616	10342	122266
OVER	GO:0016616	oxidoreductase activity, acting on the CH-OH group of donors, NAD or NADP as acceptor	MOLECULAR_FUNCTION	5.0584e-06	1.61201e-07	122	843	10342	122039
OVER	GO:0015294	solute:cation symporter activity	MOLECULAR_FUNCTION	1.51206e-18	1.04233e-20	121	497	10343	122385
OVER	GO:0042626	ATPase-coupled transmembrane transporter activity	MOLECULAR_FUNCTION	0.000135215	6.10598e-06	121	906	10343	121976
OVER	GO:0016709	oxidoreductase activity, acting on paired donors, with incorporation or reduction of molecular oxygen, NAD(P)H as one donor, and incorporation of one atom of oxygen	MOLECULAR_FUNCTION	0.00160815	0.000101661	120	964	10344	121918
OVER	GO:0015295	solute:proton symporter activity	MOLECULAR_FUNCTION	1.99825e-18	1.46781e-20	119	486	10345	122396
OVER	GO:0008509	anion transmembrane transporter activity	MOLECULAR_FUNCTION	4.63912e-08	9.90839e-10	116	710	10348	122172
OVER	GO:0015297	antiporter activity	MOLECULAR_FUNCTION	4.54901e-11	6.99136e-13	113	597	10351	122285
OVER	GO:0016684	oxidoreductase activity, acting on peroxide as acceptor	MOLECULAR_FUNCTION	0.00208882	0.00013691	113	904	10351	121978
OVER	GO:0004601	peroxidase activity	MOLECULAR_FUNCTION	0.00208555	0.000135194	112	894	10352	121988
OVER	GO:0051213	dioxygenase activity	MOLECULAR_FUNCTION	6.11766e-06	1.99797e-07	105	696	10359	122186
OVER	GO:0046527	glucosyltransferase activity	MOLECULAR_FUNCTION	0.00255629	0.000172749	97	756	10367	122126
OVER	GO:0050660	flavin adenine dinucleotide binding	MOLECULAR_FUNCTION	0.0013062	8.14809e-05	96	729	10368	122153
OVER	GO:0004888	transmembrane signaling receptor activity	MOLECULAR_FUNCTION	0.00166678	0.000106045	96	735	10368	122147
OVER	GO:0004364	glutathione transferase activity	MOLECULAR_FUNCTION	1.05021e-21	5.1033e-24	91	266	10373	122616
OVER	GO:0019199	transmembrane receptor protein kinase activity	MOLECULAR_FUNCTION	0.0025596	0.000173262	91	699	10373	122183
OVER	GO:0019842	vitamin binding	MOLECULAR_FUNCTION	0.000162226	7.55306e-06	84	572	10380	122310
OVER	GO:0005516	calmodulin binding	MOLECULAR_FUNCTION	8.86644e-07	2.36465e-08	83	479	10381	122403
OVER	GO:0016830	carbon-carbon lyase activity	MOLECULAR_FUNCTION	0.000228582	1.11592e-05	82	561	10382	122321
OVER	GO:0035251	UDP-glucosyltransferase activity	MOLECULAR_FUNCTION	0.00129326	8.05272e-05	81	589	10383	122293
OVER	GO:0015144	carbohydrate transmembrane transporter activity	MOLECULAR_FUNCTION	5.84081e-12	8.51468e-14	80	336	10384	122546
OVER	GO:0008514	organic anion transmembrane transporter activity	MOLECULAR_FUNCTION	3.93565e-08	8.27247e-10	77	394	10387	122488
OVER	GO:0016810	hydrolase activity, acting on carbon-nitrogen (but not peptide) bonds	MOLECULAR_FUNCTION	0.00282731	0.00019394	73	533	10391	122349
OVER	GO:0042887	amide transmembrane transporter activity	MOLECULAR_FUNCTION	2.13041e-05	7.53553e-07	71	425	10393	122457
OVER	GO:0016836	hydro-lyase activity	MOLECULAR_FUNCTION	0.000135215	6.1121e-06	66	412	10398	122470
OVER	GO:0004722	protein serine/threonine phosphatase activity	MOLECULAR_FUNCTION	0.000659696	3.77225e-05	66	440	10398	122442
OVER	GO:0004190	aspartic-type endopeptidase activity	MOLECULAR_FUNCTION	0.000917779	5.40358e-05	66	446	10398	122436
OVER	GO:0070001	aspartic-type peptidase activity	MOLECULAR_FUNCTION	0.000917779	5.40358e-05	66	446	10398	122436
OVER	GO:0030170	pyridoxal phosphate binding	MOLECULAR_FUNCTION	9.73696e-05	4.1263e-06	65	398	10399	122484
OVER	GO:0070279	vitamin B6 binding	MOLECULAR_FUNCTION	9.73696e-05	4.1263e-06	65	398	10399	122484
OVER	GO:0015926	glucosidase activity	MOLECULAR_FUNCTION	0.000312839	1.59017e-05	64	409	10400	122473
OVER	GO:0016667	oxidoreductase activity, acting on a sulfur group of donors	MOLECULAR_FUNCTION	0.000137682	6.2703e-06	63	387	10401	122495
OVER	GO:1904680	peptide transmembrane transporter activity	MOLECULAR_FUNCTION	0.00114506	6.92011e-05	61	406	10403	122476
OVER	GO:0072509	divalent inorganic cation transmembrane transporter activity	MOLECULAR_FUNCTION	3.09321e-06	9.36806e-08	58	297	10406	122585
OVER	GO:0005342	organic acid transmembrane transporter activity	MOLECULAR_FUNCTION	1.39884e-06	3.95197e-08	57	281	10407	122601
OVER	GO:0046943	carboxylic acid transmembrane transporter activity	MOLECULAR_FUNCTION	1.39884e-06	3.95197e-08	57	281	10407	122601
OVER	GO:0016903	oxidoreductase activity, acting on the aldehyde or oxo group of donors	MOLECULAR_FUNCTION	4.86296e-05	1.87946e-06	55	306	10409	122576
OVER	GO:0010181	FMN binding	MOLECULAR_FUNCTION	9.74781e-12	1.44306e-13	54	173	10410	122709
OVER	GO:0035673	oligopeptide transmembrane transporter activity	MOLECULAR_FUNCTION	8.72849e-06	2.92955e-07	54	278	10410	122604
OVER	GO:0030145	manganese ion binding	MOLECULAR_FUNCTION	0.000143514	6.58456e-06	54	313	10410	122569
OVER	GO:0008483	transaminase activity	MOLECULAR_FUNCTION	2.27405e-08	4.6771e-10	53	216	10411	122666
OVER	GO:0016769	transferase activity, transferring nitrogenous groups	MOLECULAR_FUNCTION	2.27405e-08	4.6771e-10	53	216	10411	122666
OVER	GO:0015333	peptide:proton symporter activity	MOLECULAR_FUNCTION	1.27537e-06	3.47344e-08	52	243	10412	122639
OVER	GO:0031406	carboxylic acid binding	MOLECULAR_FUNCTION	2.22716e-05	8.00357e-07	52	273	10412	122609
OVER	GO:0043177	organic acid binding	MOLECULAR_FUNCTION	2.22716e-05	8.00357e-07	52	273	10412	122609
OVER	GO:0005351	carbohydrate:proton symporter activity	MOLECULAR_FUNCTION	1.93786e-07	4.41309e-09	51	219	10413	122663
OVER	GO:0005402	carbohydrate:cation symporter activity	MOLECULAR_FUNCTION	1.93786e-07	4.41309e-09	51	219	10413	122663
OVER	GO:0016840	carbon-nitrogen lyase activity	MOLECULAR_FUNCTION	5.61685e-10	9.77506e-12	50	172	10414	122710
OVER	GO:0016831	carboxy-lyase activity	MOLECULAR_FUNCTION	0.00882677	0.000756096	50	349	10414	122533
OVER	GO:0005543	phospholipid binding	MOLECULAR_FUNCTION	0.000137273	6.23617e-06	49	272	10415	122610
OVER	GO:0004724	magnesium-dependent protein serine/threonine phosphatase activity	MOLECULAR_FUNCTION	0.00036548	1.89989e-05	46	261	10418	122621
OVER	GO:0008422	beta-glucosidase activity	MOLECULAR_FUNCTION	0.00600505	0.000490637	46	306	10418	122576
OVER	GO:0015079	potassium ion transmembrane transporter activity	MOLECULAR_FUNCTION	0.000453862	2.45677e-05	45	256	10419	122626
OVER	GO:0042910	xenobiotic transmembrane transporter activity	MOLECULAR_FUNCTION	0.000753576	4.34313e-05	45	263	10419	122619
OVER	GO:0046915	transition metal ion transmembrane transporter activity	MOLECULAR_FUNCTION	0.00248489	0.000166802	45	281	10419	122601
OVER	GO:1901681	sulfur compound binding	MOLECULAR_FUNCTION	1.67115e-06	4.81571e-08	43	182	10421	122700
OVER	GO:0080044	quercetin 7-O-glucosyltransferase activity	MOLECULAR_FUNCTION	2.71426e-06	8.12836e-08	43	186	10421	122696
OVER	GO:0080043	quercetin 3-O-glucosyltransferase activity	MOLECULAR_FUNCTION	3.80504e-06	1.19109e-07	43	189	10421	122693
OVER	GO:0016701	oxidoreductase activity, acting on single donors with incorporation of molecular oxygen	MOLECULAR_FUNCTION	1.31296e-05	4.49571e-07	43	200	10421	122682
OVER	GO:1901505	carbohydrate derivative transmembrane transporter activity	MOLECULAR_FUNCTION	0.00178566	0.000114618	43	259	10421	122623
OVER	GO:0008081	phosphoric diester hydrolase activity	MOLECULAR_FUNCTION	0.00192145	0.000123551	43	260	10421	122622
OVER	GO:0015171	amino acid transmembrane transporter activity	MOLECULAR_FUNCTION	0.000525631	2.93436e-05	41	226	10423	122656
OVER	GO:0061650	ubiquitin-like protein conjugating enzyme activity	MOLECULAR_FUNCTION	0.00114506	6.93583e-05	40	228	10424	122654
OVER	GO:0061631	ubiquitin conjugating enzyme activity	MOLECULAR_FUNCTION	0.00572006	0.000426629	36	218	10428	122664
OVER	GO:0072341	modified amino acid binding	MOLECULAR_FUNCTION	4.30972e-07	1.06659e-08	35	120	10429	122762
OVER	GO:0033293	monocarboxylic acid binding	MOLECULAR_FUNCTION	1.45912e-06	4.13875e-08	35	128	10429	122754
OVER	GO:0016841	ammonia-lyase activity	MOLECULAR_FUNCTION	1.0507e-14	1.15175e-16	34	49	10430	122833
OVER	GO:1900750	oligopeptide binding	MOLECULAR_FUNCTION	8.84644e-10	1.59954e-11	34	84	10430	122798
OVER	GO:0043295	glutathione binding	MOLECULAR_FUNCTION	8.84644e-10	1.59954e-11	34	84	10430	122798
OVER	GO:0035091	phosphatidylinositol binding	MOLECULAR_FUNCTION	3.21542e-06	9.81087e-08	34	127	10430	122755
OVER	GO:0045548	phenylalanine ammonia-lyase activity	MOLECULAR_FUNCTION	1.06982e-16	9.91356e-19	33	36	10431	122846
OVER	GO:0004568	chitinase activity	MOLECULAR_FUNCTION	1.46223e-09	2.70998e-11	31	71	10433	122811
OVER	GO:0008061	chitin binding	MOLECULAR_FUNCTION	2.50224e-09	4.72228e-11	31	73	10433	122809
OVER	GO:0042562	hormone binding	MOLECULAR_FUNCTION	4.54319e-08	9.65215e-10	31	85	10433	122797
OVER	GO:0016702	oxidoreductase activity, acting on single donors with incorporation of molecular oxygen, incorporation of two atoms of oxygen	MOLECULAR_FUNCTION	0.00160815	0.000101507	31	161	10433	122721
OVER	GO:0019208	phosphatase regulator activity	MOLECULAR_FUNCTION	0.00312562	0.000216169	31	169	10433	122713
OVER	GO:0019888	protein phosphatase regulator activity	MOLECULAR_FUNCTION	0.00928712	0.000796579	29	168	10435	122714
OVER	GO:0015085	calcium ion transmembrane transporter activity	MOLECULAR_FUNCTION	0.00592922	0.000478807	28	154	10436	122728
OVER	GO:0008375	acetylglucosaminyltransferase activity	MOLECULAR_FUNCTION	0.00868019	0.000741344	28	159	10436	122723
OVER	GO:0051119	sugar transmembrane transporter activity	MOLECULAR_FUNCTION	0.000268425	1.32368e-05	27	114	10437	122768
OVER	GO:0016790	thiolester hydrolase activity	MOLECULAR_FUNCTION	0.00378406	0.000267693	27	140	10437	122742
OVER	GO:0019212	phosphatase inhibitor activity	MOLECULAR_FUNCTION	3.64508e-06	1.12454e-07	26	79	10438	122803
OVER	GO:0016168	chlorophyll binding	MOLECULAR_FUNCTION	0.000521114	2.89737e-05	26	113	10438	122769
OVER	GO:0004864	protein phosphatase inhibitor activity	MOLECULAR_FUNCTION	2.51555e-05	9.26736e-07	24	78	10440	122804
OVER	GO:0043178	alcohol binding	MOLECULAR_FUNCTION	0.000453862	2.45248e-05	24	98	10440	122784
OVER	GO:0016409	palmitoyltransferase activity	MOLECULAR_FUNCTION	0.00656778	0.000543294	24	124	10440	122758
OVER	GO:0016623	oxidoreductase activity, acting on the aldehyde or oxo group of donors, oxygen as acceptor	MOLECULAR_FUNCTION	1.60805e-14	1.78086e-16	23	15	10441	122867
OVER	GO:0015605	organophosphate ester transmembrane transporter activity	MOLECULAR_FUNCTION	0.000127288	5.67245e-06	23	82	10441	122800
OVER	GO:0019840	isoprenoid binding	MOLECULAR_FUNCTION	2.00158e-05	7.01199e-07	22	65	10442	122817
OVER	GO:0016289	CoA hydrolase activity	MOLECULAR_FUNCTION	0.000131686	5.89308e-06	22	76	10442	122806
OVER	GO:0003955	NAD(P)H dehydrogenase (quinone) activity	MOLECULAR_FUNCTION	1.10082e-06	2.98561e-08	21	47	10443	122835
OVER	GO:0016671	oxidoreductase activity, acting on a sulfur group of donors, disulfide as acceptor	MOLECULAR_FUNCTION	7.46977e-06	2.49864e-07	21	55	10443	122827
OVER	GO:0140299	small molecule sensor activity	MOLECULAR_FUNCTION	1.35282e-06	3.7608e-08	20	43	10444	122839
OVER	GO:0000155	phosphorelay sensor kinase activity	MOLECULAR_FUNCTION	1.35282e-06	3.7608e-08	20	43	10444	122839
OVER	GO:0004673	protein histidine kinase activity	MOLECULAR_FUNCTION	3.80504e-06	1.18869e-07	20	47	10444	122835
OVER	GO:0016775	phosphotransferase activity, nitrogenous group as acceptor	MOLECULAR_FUNCTION	3.80504e-06	1.18869e-07	20	47	10444	122835
OVER	GO:0042973	glucan endo-1,3-beta-D-glucosidase activity	MOLECULAR_FUNCTION	5.56652e-05	2.16787e-06	20	59	10444	122823
OVER	GO:0010427	abscisic acid binding	MOLECULAR_FUNCTION	0.000133499	5.98929e-06	20	64	10444	122818
OVER	GO:0015491	cation:cation antiporter activity	MOLECULAR_FUNCTION	0.000298295	1.51018e-05	20	69	10444	122813
OVER	GO:0052866	phosphatidylinositol phosphate phosphatase activity	MOLECULAR_FUNCTION	0.00208555	0.000135377	20	83	10444	122799
OVER	GO:0050162	oxalate oxidase activity	MOLECULAR_FUNCTION	2.08331e-12	2.94285e-14	18	9	10446	122873
OVER	GO:0080030	methyl indole-3-acetate esterase activity	MOLECULAR_FUNCTION	8.49578e-05	3.4659e-06	18	50	10446	122832
OVER	GO:0080031	methyl salicylate esterase activity	MOLECULAR_FUNCTION	8.49578e-05	3.4659e-06	18	50	10446	122832
OVER	GO:0080032	methyl jasmonate esterase activity	MOLECULAR_FUNCTION	8.49578e-05	3.4659e-06	18	50	10446	122832
OVER	GO:0015301	anion:anion antiporter activity	MOLECULAR_FUNCTION	0.000930974	5.50231e-05	18	64	10446	122818
OVER	GO:0140323	solute:anion antiporter activity	MOLECULAR_FUNCTION	0.000930974	5.50231e-05	18	64	10446	122818
OVER	GO:0015086	cadmium ion transmembrane transporter activity	MOLECULAR_FUNCTION	0.00776592	0.00065557	18	81	10446	122801
OVER	GO:0106019	phosphatidylinositol-4,5-bisphosphate phosphatase activity	MOLECULAR_FUNCTION	0.00355169	0.00024965	17	67	10447	122815
OVER	GO:0004439	phosphatidylinositol-4,5-bisphosphate 5-phosphatase activity	MOLECULAR_FUNCTION	0.00355169	0.00024965	17	67	10447	122815
OVER	GO:0034593	phosphatidylinositol bisphosphate phosphatase activity	MOLECULAR_FUNCTION	0.00355169	0.00024965	17	67	10447	122815
OVER	GO:0034595	phosphatidylinositol phosphate 5-phosphatase activity	MOLECULAR_FUNCTION	0.00405291	0.000289461	17	68	10447	122814
OVER	GO:0045156	electron transporter, transferring electrons within the cyclic electron transport pathway of photosynthesis activity	MOLECULAR_FUNCTION	0.000329458	1.69029e-05	16	46	10448	122836
OVER	GO:0008028	monocarboxylic acid transmembrane transporter activity	MOLECULAR_FUNCTION	0.000970989	5.7827e-05	16	52	10448	122830
OVER	GO:0051139	metal ion:proton antiporter activity	MOLECULAR_FUNCTION	0.00288466	0.000198852	16	59	10448	122823
OVER	GO:0005451	monovalent cation:proton antiporter activity	MOLECULAR_FUNCTION	0.00692883	0.000574727	16	66	10448	122816
OVER	GO:0016863	intramolecular oxidoreductase activity, transposing C=C bonds	MOLECULAR_FUNCTION	0.00036548	1.89903e-05	15	41	10449	122841
OVER	GO:0004805	trehalose-phosphatase activity	MOLECULAR_FUNCTION	0.00762874	0.000643098	15	60	10449	122822
OVER	GO:0120014	phospholipid transfer activity	MOLECULAR_FUNCTION	0.00130744	8.17055e-05	14	42	10450	122840
OVER	GO:0120013	lipid transfer activity	MOLECULAR_FUNCTION	0.00223732	0.000149677	14	45	10450	122837
OVER	GO:0102721	ubiquinol:oxygen oxidoreductase activity	MOLECULAR_FUNCTION	3.71517e-07	8.9426e-09	13	12	10451	122870
OVER	GO:0009916	alternative oxidase activity	MOLECULAR_FUNCTION	6.37737e-07	1.65899e-08	13	13	10451	122869
OVER	GO:0070403	NAD+ binding	MOLECULAR_FUNCTION	0.000407021	2.15341e-05	13	31	10451	122851
OVER	GO:0072328	alkene binding	MOLECULAR_FUNCTION	5.65919e-06	1.83545e-07	12	14	10452	122868
OVER	GO:0038199	ethylene receptor activity	MOLECULAR_FUNCTION	5.65919e-06	1.83545e-07	12	14	10452	122868
OVER	GO:0051740	ethylene binding	MOLECULAR_FUNCTION	5.65919e-06	1.83545e-07	12	14	10452	122868
OVER	GO:0004084	branched-chain-amino-acid transaminase activity	MOLECULAR_FUNCTION	2.91212e-05	1.08929e-06	11	14	10453	122868
OVER	GO:0008526	phosphatidylinositol transfer activity	MOLECULAR_FUNCTION	9.86814e-05	4.20419e-06	11	17	10453	122865
OVER	GO:0004300	enoyl-CoA hydratase activity	MOLECULAR_FUNCTION	0.00458145	0.000333537	10	26	10454	122856
OVER	GO:0004042	acetyl-CoA:L-glutamate N-acetyltransferase activity	MOLECULAR_FUNCTION	0.000407021	2.17103e-05	9	13	10455	122869
OVER	GO:0015120	phosphoglycerate transmembrane transporter activity	MOLECULAR_FUNCTION	0.000407021	2.17103e-05	9	13	10455	122869
OVER	GO:0071917	triose-phosphate transmembrane transporter activity	MOLECULAR_FUNCTION	0.000407021	2.17103e-05	9	13	10455	122869
OVER	GO:0061522	1,4-dihydroxy-2-naphthoyl-CoA thioesterase activity	MOLECULAR_FUNCTION	0.00084518	4.93793e-05	9	15	10455	122867
OVER	GO:0042879	aldonate transmembrane transporter activity	MOLECULAR_FUNCTION	0.00117622	7.17777e-05	9	16	10455	122866
OVER	GO:0004165	dodecenoyl-CoA delta-isomerase activity	MOLECULAR_FUNCTION	0.00160815	0.000102133	9	17	10455	122865
OVER	GO:0010277	chlorophyllide a oxygenase [overall] activity	MOLECULAR_FUNCTION	0.00214882	0.000142542	9	18	10455	122864
OVER	GO:0015217	ADP transmembrane transporter activity	MOLECULAR_FUNCTION	0.00374611	0.000263739	9	20	10455	122862
OVER	GO:0016703	oxidoreductase activity, acting on single donors with incorporation of molecular oxygen, incorporation of one atom of oxygen (internal monooxygenases or internal mixed function oxidases)	MOLECULAR_FUNCTION	0.00714	0.00059547	9	23	10455	122859
OVER	GO:0000257	nitrilase activity	MOLECULAR_FUNCTION	6.96754e-05	2.7952e-06	8	6	10456	122876
OVER	GO:0018822	nitrile hydratase activity	MOLECULAR_FUNCTION	6.96754e-05	2.7952e-06	8	6	10456	122876
OVER	GO:0016815	hydrolase activity, acting on carbon-nitrogen (but not peptide) bonds, in nitriles	MOLECULAR_FUNCTION	6.96754e-05	2.7952e-06	8	6	10456	122876
OVER	GO:0080109	indole-3-acetonitrile nitrile hydratase activity	MOLECULAR_FUNCTION	6.96754e-05	2.7952e-06	8	6	10456	122876
OVER	GO:0005274	allantoin:proton symporter activity	MOLECULAR_FUNCTION	0.000214554	1.03773e-05	8	8	10456	122874
OVER	GO:0015505	uracil:cation symporter activity	MOLECULAR_FUNCTION	0.000214554	1.03773e-05	8	8	10456	122874
OVER	GO:0015391	nucleobase:cation symporter activity	MOLECULAR_FUNCTION	0.000214554	1.03773e-05	8	8	10456	122874
OVER	GO:0017005	3'-tyrosyl-DNA phosphodiesterase activity	MOLECULAR_FUNCTION	0.000214554	1.03773e-05	8	8	10456	122874
OVER	GO:0004806	triglyceride lipase activity	MOLECULAR_FUNCTION	0.000546554	3.05734e-05	8	10	10456	122872
OVER	GO:0005350	pyrimidine nucleobase transmembrane transporter activity	MOLECULAR_FUNCTION	0.00122968	7.62902e-05	8	12	10456	122870
OVER	GO:0015210	uracil transmembrane transporter activity	MOLECULAR_FUNCTION	0.00122968	7.62902e-05	8	12	10456	122870
OVER	GO:0070259	tyrosyl-DNA phosphodiesterase activity	MOLECULAR_FUNCTION	0.00122968	7.62902e-05	8	12	10456	122870
OVER	GO:0016629	12-oxophytodienoate reductase activity	MOLECULAR_FUNCTION	0.0024931	0.000167916	8	14	10456	122868
OVER	GO:0004362	glutathione-disulfide reductase activity	MOLECULAR_FUNCTION	0.00458145	0.000334976	8	16	10456	122866
OVER	GO:0030544	Hsp70 protein binding	MOLECULAR_FUNCTION	0.000105268	4.54428e-06	7	4	10457	122878
OVER	GO:0080025	phosphatidylinositol-3,5-bisphosphate binding	MOLECULAR_FUNCTION	0.000212573	1.01614e-05	7	5	10457	122877
OVER	GO:0048040	UDP-glucuronate decarboxylase activity	MOLECULAR_FUNCTION	0.00258722	0.000175425	7	10	10457	122872
OVER	GO:0032266	phosphatidylinositol-3-phosphate binding	MOLECULAR_FUNCTION	0.00378406	0.000267603	7	11	10457	122871
OVER	GO:0009885	transmembrane histidine kinase cytokinin receptor activity	MOLECULAR_FUNCTION	0.000651333	3.70971e-05	6	4	10458	122878
OVER	GO:0009884	cytokinin receptor activity	MOLECULAR_FUNCTION	0.000651333	3.70971e-05	6	4	10458	122878
OVER	GO:0008442	3-hydroxyisobutyrate dehydrogenase activity	MOLECULAR_FUNCTION	0.000651333	3.70971e-05	6	4	10458	122878
OVER	GO:0009784	transmembrane receptor histidine kinase activity	MOLECULAR_FUNCTION	0.000651333	3.70971e-05	6	4	10458	122878
OVER	GO:0052736	beta-glucanase activity	MOLECULAR_FUNCTION	0.0021467	0.000142159	6	6	10458	122876
OVER	GO:0052861	glucan endo-1,3-beta-glucanase activity, C-3 substituted reducing group	MOLECULAR_FUNCTION	0.0021467	0.000142159	6	6	10458	122876
OVER	GO:0016412	serine O-acyltransferase activity	MOLECULAR_FUNCTION	0.00352852	0.000246426	6	7	10458	122875
OVER	GO:0009001	serine O-acetyltransferase activity	MOLECULAR_FUNCTION	0.00352852	0.000246426	6	7	10458	122875
OVER	GO:0008883	glutamyl-tRNA reductase activity	MOLECULAR_FUNCTION	0.00352852	0.000246426	6	7	10458	122875
OVER	GO:0004640	phosphoribosylanthranilate isomerase activity	MOLECULAR_FUNCTION	0.00745041	0.00062641	6	9	10458	122873
OVER	GO:0047427	cyanoalanine nitrilase activity	MOLECULAR_FUNCTION	0.00401851	0.000286096	5	4	10459	122878
OVER	GO:0003995	acyl-CoA dehydrogenase activity	MOLECULAR_FUNCTION	0.00401851	0.000286096	5	4	10459	122878
OVER	GO:0018488	aryl-aldehyde oxidase activity	MOLECULAR_FUNCTION	0.00647749	0.000535094	5	5	10459	122877
OVER	GO:0050302	indole-3-acetaldehyde oxidase activity	MOLECULAR_FUNCTION	0.00647749	0.000535094	5	5	10459	122877
OVER	GO:0004865	protein serine/threonine phosphatase inhibitor activity	MOLECULAR_FUNCTION	0.00260263	0.000177609	4	1	10460	122881
OVER	GO:0004856	xylulokinase activity	MOLECULAR_FUNCTION	0.00608803	0.000499481	4	2	10460	122880
OVER	GO:0004612	phosphoenolpyruvate carboxykinase (ATP) activity	MOLECULAR_FUNCTION	0.00608803	0.000499481	4	2	10460	122880
OVER	GO:0001716	L-amino-acid oxidase activity	MOLECULAR_FUNCTION	0.00592922	0.000483102	3	0	10461	122882
OVER	GO:0004168	dolichol kinase activity	MOLECULAR_FUNCTION	0.00592922	0.000483102	3	0	10461	122882
OVER	GO:0000248	C-5 sterol desaturase activity	MOLECULAR_FUNCTION	0.00592922	0.000483102	3	0	10461	122882
OVER	GO:0010326	methionine-oxo-acid transaminase activity	MOLECULAR_FUNCTION	0.00592922	0.000483102	3	0	10461	122882
OVER	GO:0004503	monophenol monooxygenase activity	MOLECULAR_FUNCTION	0.00592922	0.000483102	3	0	10461	122882
OVER	GO:0062046	dehydropipecolic acid reductase	MOLECULAR_FUNCTION	0.00592922	0.000483102	3	0	10461	122882
OVER	GO:0016920	pyroglutamyl-peptidase activity	MOLECULAR_FUNCTION	0.00592922	0.000483102	3	0	10461	122882
OVER	GO:0046522	S-methyl-5-thioribose kinase activity	MOLECULAR_FUNCTION	0.00592922	0.000483102	3	0	10461	122882
OVER	GO:0016716	oxidoreductase activity, acting on paired donors, with incorporation or reduction of molecular oxygen, another compound as one donor, and incorporation of one atom of oxygen	MOLECULAR_FUNCTION	0.00592922	0.000483102	3	0	10461	122882
OVER	GO:0033854	glutamate-prephenate aminotransferase activity	MOLECULAR_FUNCTION	0.00592922	0.000483102	3	0	10461	122882
OVER	GO:0033853	aspartate-prephenate aminotransferase activity	MOLECULAR_FUNCTION	0.00592922	0.000483102	3	0	10461	122882
OVER	GO:0032441	pheophorbide a oxygenase activity	MOLECULAR_FUNCTION	0.00592922	0.000483102	3	0	10461	122882
OVER	GO:0003939	L-iditol 2-dehydrogenase activity	MOLECULAR_FUNCTION	0.00592922	0.000483102	3	0	10461	122882
OVER	GO:0070704	sterol desaturase activity	MOLECULAR_FUNCTION	0.00592922	0.000483102	3	0	10461	122882
OVER	GO:0015922	aspartate oxidase activity	MOLECULAR_FUNCTION	0.00592922	0.000483102	3	0	10461	122882
OVER	GO:0008936	nicotinamidase activity	MOLECULAR_FUNCTION	0.00592922	0.000483102	3	0	10461	122882
OVER	GO:0008987	quinolinate synthetase A activity	MOLECULAR_FUNCTION	0.00592922	0.000483102	3	0	10461	122882
OVER	GO:0008962	phosphatidylglycerophosphatase activity	MOLECULAR_FUNCTION	0.00592922	0.000483102	3	0	10461	122882
OVER	GO:0052862	glucan endo-1,4-beta-glucanase activity, C-3 substituted reducing group	MOLECULAR_FUNCTION	0.00592922	0.000483102	3	0	10461	122882
OVER	GO:0008734	L-aspartate oxidase activity	MOLECULAR_FUNCTION	0.00592922	0.000483102	3	0	10461	122882
OVER	GO:0044318	L-aspartate:fumarate oxidoreductase activity	MOLECULAR_FUNCTION	0.00592922	0.000483102	3	0	10461	122882

## Sheet: 3B_SC_vs_SI_up
Tags	GO ID	GO Name	GO Category	FDR	P-Value	Nr test	Nr Reference	Non Annotated Test	Non Annotated Ref
OVER	GO:0008152	metabolic process	BIOLOGICAL_PROCESS	1.44403e-46	1.63185e-49	2630	56970	2137	71609
OVER	GO:0009987	cellular process	BIOLOGICAL_PROCESS	1.06029e-12	1.76136e-14	2525	60910	2242	67669
OVER	GO:0044237	cellular metabolic process	BIOLOGICAL_PROCESS	3.53271e-12	6.06817e-14	1972	46358	2795	82221
OVER	GO:0071704	organic substance metabolic process	BIOLOGICAL_PROCESS	3.92348e-06	1.00648e-07	1942	47577	2825	81002
OVER	GO:1901564	organonitrogen compound metabolic process	BIOLOGICAL_PROCESS	1.73684e-16	2.19828e-18	1234	26428	3533	102151
OVER	GO:0055114	oxidation-reduction process	BIOLOGICAL_PROCESS	1.41012e-99	4.7806e-103	779	8903	3988	119676
OVER	GO:0050896	response to stimulus	BIOLOGICAL_PROCESS	9.46602e-18	1.06973e-19	705	13478	4062	115101
OVER	GO:0006793	phosphorus metabolic process	BIOLOGICAL_PROCESS	2.15276e-14	3.25007e-16	689	13620	4078	114959
OVER	GO:0006796	phosphate-containing compound metabolic process	BIOLOGICAL_PROCESS	1.25159e-14	1.83871e-16	686	13511	4081	115068
OVER	GO:0006464	cellular protein modification process	BIOLOGICAL_PROCESS	0.00707698	0.000343892	593	13940	4174	114639
OVER	GO:0036211	protein modification process	BIOLOGICAL_PROCESS	0.00707698	0.000343892	593	13940	4174	114639
OVER	GO:0016310	phosphorylation	BIOLOGICAL_PROCESS	6.04023e-17	7.23544e-19	567	10431	4200	118148
OVER	GO:0006950	response to stress	BIOLOGICAL_PROCESS	5.44024e-27	2.95097e-29	474	7354	4293	121225
OVER	GO:1901362	organic cyclic compound biosynthetic process	BIOLOGICAL_PROCESS	0.00409512	0.0001865	473	10824	4294	117755
OVER	GO:0006468	protein phosphorylation	BIOLOGICAL_PROCESS	1.10842e-23	7.64084e-26	467	7502	4300	121077
OVER	GO:0019438	aromatic compound biosynthetic process	BIOLOGICAL_PROCESS	0.00197786	8.09114e-05	459	10366	4308	118213
OVER	GO:0044281	small molecule metabolic process	BIOLOGICAL_PROCESS	2.2529e-34	5.09188e-37	444	6178	4323	122401
OVER	GO:0009056	catabolic process	BIOLOGICAL_PROCESS	6.05123e-19	6.29126e-21	444	7480	4323	121099
OVER	GO:0042221	response to chemical	BIOLOGICAL_PROCESS	9.50864e-21	9.02617e-23	367	5689	4400	122890
OVER	GO:0055085	transmembrane transport	BIOLOGICAL_PROCESS	2.01919e-14	2.98919e-16	358	6109	4409	122470
OVER	GO:0044248	cellular catabolic process	BIOLOGICAL_PROCESS	4.45722e-15	5.99401e-17	352	5908	4415	122671
OVER	GO:0006082	organic acid metabolic process	BIOLOGICAL_PROCESS	3.3309e-39	5.64623e-42	332	3821	4435	124758
OVER	GO:0043436	oxoacid metabolic process	BIOLOGICAL_PROCESS	1.40725e-37	2.54447e-40	326	3795	4441	124784
OVER	GO:1901575	organic substance catabolic process	BIOLOGICAL_PROCESS	3.62508e-06	9.25831e-08	323	6432	4444	122147
OVER	GO:0019752	carboxylic acid metabolic process	BIOLOGICAL_PROCESS	2.06038e-37	3.95824e-40	322	3734	4445	124845
OVER	GO:0005975	carbohydrate metabolic process	BIOLOGICAL_PROCESS	6.57732e-13	1.07033e-14	268	4348	4499	124231
OVER	GO:0006952	defense response	BIOLOGICAL_PROCESS	5.58206e-34	1.32471e-36	227	2283	4540	126296
OVER	GO:0006811	ion transport	BIOLOGICAL_PROCESS	0.000137975	4.24106e-06	213	4155	4554	124424
OVER	GO:0070887	cellular response to chemical stimulus	BIOLOGICAL_PROCESS	2.83358e-13	4.48301e-15	210	3127	4557	125452
OVER	GO:0044283	small molecule biosynthetic process	BIOLOGICAL_PROCESS	1.51955e-22	1.20204e-24	205	2437	4562	126142
OVER	GO:0006520	cellular amino acid metabolic process	BIOLOGICAL_PROCESS	1.81412e-33	4.5102e-36	192	1753	4575	126826
OVER	GO:1901565	organonitrogen compound catabolic process	BIOLOGICAL_PROCESS	0.00953374	0.00048102	190	3982	4577	124597
OVER	GO:0016053	organic acid biosynthetic process	BIOLOGICAL_PROCESS	1.67899e-27	8.72794e-30	178	1758	4589	126821
OVER	GO:0046394	carboxylic acid biosynthetic process	BIOLOGICAL_PROCESS	1.67899e-27	8.72794e-30	178	1758	4589	126821
OVER	GO:0009607	response to biotic stimulus	BIOLOGICAL_PROCESS	1.7014e-22	1.36512e-24	164	1737	4603	126842
OVER	GO:0034220	ion transmembrane transport	BIOLOGICAL_PROCESS	0.000137776	4.2038e-06	160	2952	4607	125627
OVER	GO:0009605	response to external stimulus	BIOLOGICAL_PROCESS	2.40203e-12	4.0717e-14	158	2178	4609	126401
OVER	GO:0009636	response to toxic substance	BIOLOGICAL_PROCESS	5.60796e-35	1.2041e-37	153	1144	4614	127435
OVER	GO:0032787	monocarboxylic acid metabolic process	BIOLOGICAL_PROCESS	3.71841e-16	4.79036e-18	149	1783	4618	126796
OVER	GO:0006812	cation transport	BIOLOGICAL_PROCESS	0.000678774	2.53898e-05	146	2744	4621	125835
OVER	GO:0098754	detoxification	BIOLOGICAL_PROCESS	3.3453e-31	1.20661e-33	142	1098	4625	127481
OVER	GO:0044419	interspecies interaction between organisms	BIOLOGICAL_PROCESS	3.73578e-13	6.03299e-15	142	1826	4625	126753
OVER	GO:0006979	response to oxidative stress	BIOLOGICAL_PROCESS	1.80002e-24	1.20015e-26	138	1248	4629	127331
OVER	GO:0043207	response to external biotic stimulus	BIOLOGICAL_PROCESS	6.47921e-15	9.07924e-17	138	1654	4629	126925
OVER	GO:0051707	response to other organism	BIOLOGICAL_PROCESS	6.47921e-15	9.07924e-17	138	1654	4629	126925
OVER	GO:1901605	alpha-amino acid metabolic process	BIOLOGICAL_PROCESS	2.0018e-31	6.10787e-34	137	1022	4630	127557
OVER	GO:0006790	sulfur compound metabolic process	BIOLOGICAL_PROCESS	1.16524e-30	4.34546e-33	137	1044	4630	127535
OVER	GO:1901700	response to oxygen-containing compound	BIOLOGICAL_PROCESS	0.000239573	7.68886e-06	137	2475	4630	126104
OVER	GO:0097237	cellular response to toxic substance	BIOLOGICAL_PROCESS	1.82832e-29	8.05793e-32	136	1064	4631	127515
OVER	GO:1990748	cellular detoxification	BIOLOGICAL_PROCESS	1.82832e-29	8.05793e-32	136	1064	4631	127515
OVER	GO:0006091	generation of precursor metabolites and energy	BIOLOGICAL_PROCESS	0.000864821	3.28376e-05	132	2445	4635	126134
OVER	GO:0098869	cellular oxidant detoxification	BIOLOGICAL_PROCESS	5.25065e-27	2.7888e-29	127	1008	4640	127571
OVER	GO:0098542	defense response to other organism	BIOLOGICAL_PROCESS	9.4926e-15	1.38382e-16	126	1453	4641	127126
OVER	GO:0098660	inorganic ion transmembrane transport	BIOLOGICAL_PROCESS	0.000344955	1.13829e-05	123	2188	4644	126391
OVER	GO:0098655	cation transmembrane transport	BIOLOGICAL_PROCESS	0.00351273	0.000152037	113	2109	4654	126470
OVER	GO:0098662	inorganic cation transmembrane transport	BIOLOGICAL_PROCESS	0.002198	9.15488e-05	110	2013	4657	126566
OVER	GO:0044282	small molecule catabolic process	BIOLOGICAL_PROCESS	3.71735e-23	2.68856e-25	104	797	4663	127782
OVER	GO:0072593	reactive oxygen species metabolic process	BIOLOGICAL_PROCESS	3.12352e-21	2.85914e-23	104	853	4663	127726
OVER	GO:0006575	cellular modified amino acid metabolic process	BIOLOGICAL_PROCESS	7.71139e-40	1.22002e-42	103	455	4664	128124
OVER	GO:0006749	glutathione metabolic process	BIOLOGICAL_PROCESS	2.13855e-53	1.20836e-56	101	285	4666	128294
OVER	GO:0042743	hydrogen peroxide metabolic process	BIOLOGICAL_PROCESS	1.80257e-23	1.28333e-25	101	748	4666	127831
OVER	GO:0044262	cellular carbohydrate metabolic process	BIOLOGICAL_PROCESS	0.000663965	2.47608e-05	100	1727	4667	126852
OVER	GO:0042744	hydrogen peroxide catabolic process	BIOLOGICAL_PROCESS	6.32985e-23	4.7211e-25	98	722	4669	127857
OVER	GO:0019748	secondary metabolic process	BIOLOGICAL_PROCESS	6.579e-29	3.04824e-31	94	539	4673	128040
OVER	GO:0015672	monovalent inorganic cation transport	BIOLOGICAL_PROCESS	0.000104689	3.13512e-06	92	1469	4675	127110
OVER	GO:0009072	aromatic amino acid family metabolic process	BIOLOGICAL_PROCESS	1.47952e-46	1.83916e-49	91	272	4676	128307
OVER	GO:0071554	cell wall organization or biogenesis	BIOLOGICAL_PROCESS	0.00391436	0.000173402	90	1606	4677	126973
OVER	GO:0022900	electron transport chain	BIOLOGICAL_PROCESS	1.66435e-05	4.514e-07	89	1337	4678	127242
OVER	GO:0016052	carbohydrate catabolic process	BIOLOGICAL_PROCESS	1.3801e-09	2.69812e-11	87	1034	4680	127545
OVER	GO:0072330	monocarboxylic acid biosynthetic process	BIOLOGICAL_PROCESS	2.09256e-11	3.71264e-13	85	913	4682	127666
OVER	GO:0005976	polysaccharide metabolic process	BIOLOGICAL_PROCESS	0.00889803	0.000447466	85	1546	4682	127033
OVER	GO:0008652	cellular amino acid biosynthetic process	BIOLOGICAL_PROCESS	1.95514e-15	2.56296e-17	80	684	4687	127895
OVER	GO:0016054	organic acid catabolic process	BIOLOGICAL_PROCESS	5.24522e-21	4.9198e-23	78	510	4689	128069
OVER	GO:0046395	carboxylic acid catabolic process	BIOLOGICAL_PROCESS	5.24522e-21	4.9198e-23	78	510	4689	128069
OVER	GO:0009617	response to bacterium	BIOLOGICAL_PROCESS	2.64017e-15	3.49079e-17	78	659	4689	127920
OVER	GO:0009698	phenylpropanoid metabolic process	BIOLOGICAL_PROCESS	4.60475e-29	2.08148e-31	77	352	4690	128227
OVER	GO:0010035	response to inorganic substance	BIOLOGICAL_PROCESS	0.0047592	0.000224272	77	1336	4690	127243
OVER	GO:1901615	organic hydroxy compound metabolic process	BIOLOGICAL_PROCESS	0.000157289	4.92361e-06	74	1119	4693	127460
OVER	GO:1902600	proton transmembrane transport	BIOLOGICAL_PROCESS	0.000474082	1.66617e-05	74	1163	4693	127416
OVER	GO:1901361	organic cyclic compound catabolic process	BIOLOGICAL_PROCESS	1.21765e-05	3.24744e-07	70	956	4697	127623
OVER	GO:0042742	defense response to bacterium	BIOLOGICAL_PROCESS	9.29709e-13	1.53393e-14	69	609	4698	127970
OVER	GO:0019439	aromatic compound catabolic process	BIOLOGICAL_PROCESS	3.99359e-06	1.02897e-07	69	906	4698	127673
OVER	GO:0044550	secondary metabolite biosynthetic process	BIOLOGICAL_PROCESS	5.60208e-26	3.4186e-28	68	307	4699	128272
OVER	GO:0042537	benzene-containing compound metabolic process	BIOLOGICAL_PROCESS	2.80819e-31	8.88567e-34	67	230	4700	128349
OVER	GO:1901607	alpha-amino acid biosynthetic process	BIOLOGICAL_PROCESS	1.82319e-09	3.60558e-11	62	619	4705	127960
OVER	GO:0044036	cell wall macromolecule metabolic process	BIOLOGICAL_PROCESS	4.39812e-09	8.74752e-11	62	634	4705	127945
OVER	GO:0009699	phenylpropanoid biosynthetic process	BIOLOGICAL_PROCESS	5.78553e-23	4.24974e-25	55	222	4712	128357
OVER	GO:1901606	alpha-amino acid catabolic process	BIOLOGICAL_PROCESS	1.66682e-21	1.46922e-23	55	242	4712	128337
OVER	GO:0009063	cellular amino acid catabolic process	BIOLOGICAL_PROCESS	1.36576e-18	1.48167e-20	55	287	4712	128292
OVER	GO:0009620	response to fungus	BIOLOGICAL_PROCESS	9.75225e-08	2.14904e-09	54	560	4713	128019
OVER	GO:0009308	amine metabolic process	BIOLOGICAL_PROCESS	8.72244e-12	1.52783e-13	53	409	4714	128170
OVER	GO:0007166	cell surface receptor signaling pathway	BIOLOGICAL_PROCESS	0.000185979	5.84271e-06	52	696	4715	127883
OVER	GO:0050832	defense response to fungus	BIOLOGICAL_PROCESS	1.80836e-08	3.69887e-10	50	468	4717	128111
OVER	GO:0007178	transmembrane receptor protein serine/threonine kinase signaling pathway	BIOLOGICAL_PROCESS	0.000107603	3.24669e-06	48	607	4719	127972
OVER	GO:0007167	enzyme linked receptor protein signaling pathway	BIOLOGICAL_PROCESS	0.000107603	3.24669e-06	48	607	4719	127972
OVER	GO:0000272	polysaccharide catabolic process	BIOLOGICAL_PROCESS	4.44997e-05	1.26223e-06	47	567	4720	128012
OVER	GO:0046777	protein autophosphorylation	BIOLOGICAL_PROCESS	1.48285e-05	4.00497e-07	46	525	4721	128054
OVER	GO:0098656	anion transmembrane transport	BIOLOGICAL_PROCESS	0.005626	0.000268298	46	695	4721	127884
OVER	GO:0042430	indole-containing compound metabolic process	BIOLOGICAL_PROCESS	1.75648e-20	1.68721e-22	45	162	4722	128417
OVER	GO:0016998	cell wall macromolecule catabolic process	BIOLOGICAL_PROCESS	4.90618e-19	4.93446e-21	45	179	4722	128400
OVER	GO:1902221	erythrose 4-phosphate/phosphoenolpyruvate family amino acid metabolic process	BIOLOGICAL_PROCESS	1.68958e-31	4.96431e-34	44	68	4723	128511
OVER	GO:0006558	L-phenylalanine metabolic process	BIOLOGICAL_PROCESS	1.68958e-31	4.96431e-34	44	68	4723	128511
OVER	GO:0009073	aromatic amino acid family biosynthetic process	BIOLOGICAL_PROCESS	8.69479e-20	8.45013e-22	44	161	4723	128418
OVER	GO:0009651	response to salt stress	BIOLOGICAL_PROCESS	0.00114136	4.50381e-05	44	601	4723	127978
OVER	GO:0002239	response to oomycetes	BIOLOGICAL_PROCESS	5.28341e-15	7.22447e-17	43	217	4724	128362
OVER	GO:0002229	defense response to oomycetes	BIOLOGICAL_PROCESS	5.28341e-15	7.22447e-17	43	217	4724	128362
OVER	GO:0009074	aromatic amino acid family catabolic process	BIOLOGICAL_PROCESS	5.87482e-30	2.45642e-32	42	66	4725	128513
OVER	GO:0042435	indole-containing compound biosynthetic process	BIOLOGICAL_PROCESS	1.93006e-19	1.91938e-21	41	139	4726	128440
OVER	GO:0009415	response to water	BIOLOGICAL_PROCESS	0.000577801	2.10252e-05	41	525	4726	128054
OVER	GO:0001101	response to acid chemical	BIOLOGICAL_PROCESS	0.00201832	8.27947e-05	41	561	4726	128018
OVER	GO:0006576	cellular biogenic amine metabolic process	BIOLOGICAL_PROCESS	1.29441e-11	2.28193e-13	40	245	4727	128334
OVER	GO:0044106	cellular amine metabolic process	BIOLOGICAL_PROCESS	3.74463e-10	7.10925e-12	40	277	4727	128302
OVER	GO:0008643	carbohydrate transport	BIOLOGICAL_PROCESS	0.000486838	1.72751e-05	40	502	4727	128077
OVER	GO:0006720	isoprenoid metabolic process	BIOLOGICAL_PROCESS	0.00692979	0.00033439	40	583	4727	127996
OVER	GO:1902222	erythrose 4-phosphate/phosphoenolpyruvate family amino acid catabolic process	BIOLOGICAL_PROCESS	2.91957e-30	1.18775e-32	38	45	4729	128534
OVER	GO:0006559	L-phenylalanine catabolic process	BIOLOGICAL_PROCESS	2.91957e-30	1.18775e-32	38	45	4729	128534
OVER	GO:1901136	carbohydrate derivative catabolic process	BIOLOGICAL_PROCESS	1.60044e-10	2.91186e-12	37	231	4730	128348
OVER	GO:0009064	glutamine family amino acid metabolic process	BIOLOGICAL_PROCESS	1.32865e-07	3.01796e-09	37	304	4730	128275
OVER	GO:0009414	response to water deprivation	BIOLOGICAL_PROCESS	0.00112686	4.40607e-05	37	470	4730	128109
OVER	GO:0009800	cinnamic acid biosynthetic process	BIOLOGICAL_PROCESS	3.3453e-31	1.20974e-33	36	33	4731	128546
OVER	GO:0009803	cinnamic acid metabolic process	BIOLOGICAL_PROCESS	3.3453e-31	1.20974e-33	36	33	4731	128546
OVER	GO:0042493	response to drug	BIOLOGICAL_PROCESS	1.00957e-10	1.82542e-12	36	215	4731	128364
OVER	GO:0009409	response to cold	BIOLOGICAL_PROCESS	0.000834115	3.15774e-05	36	444	4731	128135
OVER	GO:0006855	drug transmembrane transport	BIOLOGICAL_PROCESS	3.50094e-10	6.60704e-12	35	214	4732	128365
OVER	GO:0015893	drug transport	BIOLOGICAL_PROCESS	3.50094e-10	6.60704e-12	35	214	4732	128365
OVER	GO:0009808	lignin metabolic process	BIOLOGICAL_PROCESS	7.54967e-10	1.46745e-11	35	221	4732	128358
OVER	GO:0042908	xenobiotic transport	BIOLOGICAL_PROCESS	1.05654e-07	2.37599e-09	35	273	4732	128306
OVER	GO:0006040	amino sugar metabolic process	BIOLOGICAL_PROCESS	8.76242e-15	1.26748e-16	33	122	4734	128457
OVER	GO:0034219	carbohydrate transmembrane transport	BIOLOGICAL_PROCESS	4.43968e-05	1.25429e-06	33	330	4734	128249
OVER	GO:1901072	glucosamine-containing compound catabolic process	BIOLOGICAL_PROCESS	1.65828e-21	1.44296e-23	32	58	4735	128521
OVER	GO:0046348	amino sugar catabolic process	BIOLOGICAL_PROCESS	1.65828e-21	1.44296e-23	32	58	4735	128521
OVER	GO:0006026	aminoglycan catabolic process	BIOLOGICAL_PROCESS	1.65828e-21	1.44296e-23	32	58	4735	128521
OVER	GO:0006032	chitin catabolic process	BIOLOGICAL_PROCESS	1.65828e-21	1.44296e-23	32	58	4735	128521
OVER	GO:0006030	chitin metabolic process	BIOLOGICAL_PROCESS	1.65828e-21	1.44296e-23	32	58	4735	128521
OVER	GO:0006022	aminoglycan metabolic process	BIOLOGICAL_PROCESS	1.71571e-19	1.68682e-21	32	71	4735	128508
OVER	GO:1901071	glucosamine-containing compound metabolic process	BIOLOGICAL_PROCESS	1.09953e-18	1.168e-20	32	77	4735	128502
OVER	GO:0006568	tryptophan metabolic process	BIOLOGICAL_PROCESS	1.4553e-16	1.82549e-18	32	95	4735	128484
OVER	GO:0006586	indolalkylamine metabolic process	BIOLOGICAL_PROCESS	1.4553e-16	1.82549e-18	32	95	4735	128484
OVER	GO:0009611	response to wounding	BIOLOGICAL_PROCESS	0.00377473	0.000166363	32	411	4735	128168
OVER	GO:0006721	terpenoid metabolic process	BIOLOGICAL_PROCESS	0.00439844	0.000203295	32	416	4735	128163
OVER	GO:0042401	cellular biogenic amine biosynthetic process	BIOLOGICAL_PROCESS	2.82626e-10	5.26989e-12	30	155	4737	128424
OVER	GO:0009309	amine biosynthetic process	BIOLOGICAL_PROCESS	2.82626e-10	5.26989e-12	30	155	4737	128424
OVER	GO:0018958	phenol-containing compound metabolic process	BIOLOGICAL_PROCESS	7.74795e-07	1.84746e-08	28	201	4739	128378
OVER	GO:0043648	dicarboxylic acid metabolic process	BIOLOGICAL_PROCESS	0.00421143	0.000193224	28	342	4739	128237
OVER	GO:1903825	organic acid transmembrane transport	BIOLOGICAL_PROCESS	0.00438049	0.000201971	28	343	4739	128236
OVER	GO:1905039	carboxylic acid transmembrane transport	BIOLOGICAL_PROCESS	0.00438049	0.000201971	28	343	4739	128236
OVER	GO:0046219	indolalkylamine biosynthetic process	BIOLOGICAL_PROCESS	1.06047e-16	1.29428e-18	26	52	4741	128527
OVER	GO:0000162	tryptophan biosynthetic process	BIOLOGICAL_PROCESS	1.06047e-16	1.29428e-18	26	52	4741	128527
OVER	GO:0009696	salicylic acid metabolic process	BIOLOGICAL_PROCESS	6.47449e-08	1.36821e-09	26	152	4741	128427
OVER	GO:0035672	oligopeptide transmembrane transport	BIOLOGICAL_PROCESS	0.00080534	3.0397e-05	26	271	4741	128308
OVER	GO:0006857	oligopeptide transport	BIOLOGICAL_PROCESS	0.00731017	0.00035605	26	320	4741	128259
OVER	GO:0044242	cellular lipid catabolic process	BIOLOGICAL_PROCESS	0.00953374	0.000481589	26	327	4741	128252
OVER	GO:0009694	jasmonic acid metabolic process	BIOLOGICAL_PROCESS	6.89019e-08	1.47112e-09	25	141	4742	128438
OVER	GO:0046686	response to cadmium ion	BIOLOGICAL_PROCESS	0.00246731	0.000104837	25	277	4742	128302
OVER	GO:0034754	cellular hormone metabolic process	BIOLOGICAL_PROCESS	0.000271559	8.86887e-06	20	161	4747	128418
OVER	GO:0031407	oxylipin metabolic process	BIOLOGICAL_PROCESS	3.00983e-06	7.58495e-08	18	92	4749	128487
OVER	GO:0031408	oxylipin biosynthetic process	BIOLOGICAL_PROCESS	3.00983e-06	7.58495e-08	18	92	4749	128487
OVER	GO:0016101	diterpenoid metabolic process	BIOLOGICAL_PROCESS	7.69363e-06	2.02578e-07	17	88	4750	128491
OVER	GO:0009809	lignin biosynthetic process	BIOLOGICAL_PROCESS	0.000899757	3.42658e-05	16	121	4751	128458
OVER	GO:0043650	dicarboxylic acid biosynthetic process	BIOLOGICAL_PROCESS	0.000972674	3.74824e-05	16	122	4751	128457
OVER	GO:0040011	locomotion	BIOLOGICAL_PROCESS	4.92758e-07	1.15825e-08	15	52	4752	128527
OVER	GO:0009685	gibberellin metabolic process	BIOLOGICAL_PROCESS	5.47099e-06	1.43437e-07	15	65	4752	128514
OVER	GO:0046351	disaccharide biosynthetic process	BIOLOGICAL_PROCESS	0.0036458	0.00015862	15	125	4752	128454
OVER	GO:0009084	glutamine family amino acid biosynthetic process	BIOLOGICAL_PROCESS	0.00370084	0.00016227	14	111	4753	128468
OVER	GO:0010200	response to chitin	BIOLOGICAL_PROCESS	1.66623e-07	3.8224e-09	13	32	4754	128547
OVER	GO:0005991	trehalose metabolic process	BIOLOGICAL_PROCESS	0.000349716	1.1619e-05	13	73	4754	128506
OVER	GO:0009690	cytokinin metabolic process	BIOLOGICAL_PROCESS	0.00670317	0.000322534	13	105	4754	128474
OVER	GO:0009772	photosynthetic electron transport in photosystem II	BIOLOGICAL_PROCESS	3.54572e-06	9.01557e-08	12	36	4755	128543
OVER	GO:0006525	arginine metabolic process	BIOLOGICAL_PROCESS	0.00063898	2.37568e-05	12	67	4755	128512
OVER	GO:0006012	galactose metabolic process	BIOLOGICAL_PROCESS	0.00234587	9.86172e-05	12	79	4755	128500
OVER	GO:0010104	regulation of ethylene-activated signaling pathway	BIOLOGICAL_PROCESS	0.000133353	4.05377e-06	11	45	4756	128534
OVER	GO:0070297	regulation of phosphorelay signal transduction system	BIOLOGICAL_PROCESS	0.000133353	4.05377e-06	11	45	4756	128534
OVER	GO:0005992	trehalose biosynthetic process	BIOLOGICAL_PROCESS	0.00370255	0.000162763	11	71	4756	128508
OVER	GO:0010230	alternative respiration	BIOLOGICAL_PROCESS	4.45239e-10	8.6039e-12	10	5	4757	128574
OVER	GO:1900378	positive regulation of secondary metabolite biosynthetic process	BIOLOGICAL_PROCESS	4.08622e-06	1.05746e-07	10	22	4757	128557
OVER	GO:1900376	regulation of secondary metabolite biosynthetic process	BIOLOGICAL_PROCESS	1.03146e-05	2.72757e-07	10	25	4757	128554
OVER	GO:0009635	response to herbicide	BIOLOGICAL_PROCESS	0.000137975	4.22784e-06	10	36	4757	128543
OVER	GO:0031640	killing of cells of other organism	BIOLOGICAL_PROCESS	0.00109478	4.26825e-05	10	49	4757	128530
OVER	GO:0001906	cell killing	BIOLOGICAL_PROCESS	0.00109478	4.26825e-05	10	49	4757	128530
OVER	GO:0019184	nonribosomal peptide biosynthetic process	BIOLOGICAL_PROCESS	0.00163796	6.62663e-05	10	52	4757	128527
OVER	GO:0016102	diterpenoid biosynthetic process	BIOLOGICAL_PROCESS	0.00237487	0.000100105	10	55	4757	128524
OVER	GO:0043455	regulation of secondary metabolic process	BIOLOGICAL_PROCESS	0.00267388	0.000114219	10	56	4757	128523
OVER	GO:0006536	glutamate metabolic process	BIOLOGICAL_PROCESS	0.00412264	0.000188685	10	60	4757	128519
OVER	GO:0016477	cell migration	BIOLOGICAL_PROCESS	7.49828e-05	2.20313e-06	9	25	4758	128554
OVER	GO:0048870	cell motility	BIOLOGICAL_PROCESS	0.000153153	4.74222e-06	9	28	4758	128551
OVER	GO:0051674	localization of cell	BIOLOGICAL_PROCESS	0.000153153	4.74222e-06	9	28	4758	128551
OVER	GO:0009423	chorismate biosynthetic process	BIOLOGICAL_PROCESS	0.00019082	6.01635e-06	9	29	4758	128550
OVER	GO:0009095	aromatic amino acid family biosynthetic process, prephenate pathway	BIOLOGICAL_PROCESS	0.000419618	1.44631e-05	9	33	4758	128546
OVER	GO:0046294	formaldehyde catabolic process	BIOLOGICAL_PROCESS	0.0039652	0.000180135	9	48	4758	128531
OVER	GO:0046292	formaldehyde metabolic process	BIOLOGICAL_PROCESS	0.0039652	0.000180135	9	48	4758	128531
OVER	GO:0110095	cellular detoxification of aldehyde	BIOLOGICAL_PROCESS	0.0039652	0.000180135	9	48	4758	128531
OVER	GO:0110096	cellular response to aldehyde	BIOLOGICAL_PROCESS	0.0039652	0.000180135	9	48	4758	128531
OVER	GO:0046417	chorismate metabolic process	BIOLOGICAL_PROCESS	0.00880392	0.000440743	9	55	4758	128524
OVER	GO:0072488	ammonium transmembrane transport	BIOLOGICAL_PROCESS	2.91227e-05	8.03022e-07	8	15	4759	128564
OVER	GO:0015696	ammonium transport	BIOLOGICAL_PROCESS	2.91227e-05	8.03022e-07	8	15	4759	128564
OVER	GO:0009410	response to xenobiotic stimulus	BIOLOGICAL_PROCESS	5.74309e-05	1.66147e-06	8	17	4759	128562
OVER	GO:0019740	nitrogen utilization	BIOLOGICAL_PROCESS	0.000239573	7.66252e-06	8	22	4759	128557
OVER	GO:0009686	gibberellin biosynthetic process	BIOLOGICAL_PROCESS	0.00179952	7.3209e-05	8	32	4759	128547
OVER	GO:0043649	dicarboxylic acid catabolic process	BIOLOGICAL_PROCESS	0.00344206	0.000148589	8	36	4759	128543
OVER	GO:1900704	regulation of siderophore biosynthetic process	BIOLOGICAL_PROCESS	0.000431772	1.50283e-05	7	17	4760	128562
OVER	GO:1900706	positive regulation of siderophore biosynthetic process	BIOLOGICAL_PROCESS	0.000431772	1.50283e-05	7	17	4760	128562
OVER	GO:0009938	negative regulation of gibberellic acid mediated signaling pathway	BIOLOGICAL_PROCESS	0.000431772	1.50283e-05	7	17	4760	128562
OVER	GO:0009237	siderophore metabolic process	BIOLOGICAL_PROCESS	0.00091597	3.50903e-05	7	20	4760	128559
OVER	GO:0019290	siderophore biosynthetic process	BIOLOGICAL_PROCESS	0.00091597	3.50903e-05	7	20	4760	128559
OVER	GO:0001666	response to hypoxia	BIOLOGICAL_PROCESS	0.002198	9.1656e-05	7	24	4760	128555
OVER	GO:0071731	response to nitric oxide	BIOLOGICAL_PROCESS	0.00386336	0.000170706	7	27	4760	128552
OVER	GO:1990641	response to iron ion starvation	BIOLOGICAL_PROCESS	0.00440989	0.000206815	7	28	4760	128551
OVER	GO:0046622	positive regulation of organ growth	BIOLOGICAL_PROCESS	2.94921e-05	8.23206e-07	6	5	4761	128574
OVER	GO:0010120	camalexin biosynthetic process	BIOLOGICAL_PROCESS	0.000156341	4.87627e-06	6	8	4761	128571
OVER	GO:0052317	camalexin metabolic process	BIOLOGICAL_PROCESS	0.000156341	4.87627e-06	6	8	4761	128571
OVER	GO:0015671	oxygen transport	BIOLOGICAL_PROCESS	0.000242109	7.87971e-06	6	9	4761	128570
OVER	GO:0015669	gas transport	BIOLOGICAL_PROCESS	0.000242109	7.87971e-06	6	9	4761	128570
OVER	GO:0046217	indole phytoalexin metabolic process	BIOLOGICAL_PROCESS	0.000361773	1.2224e-05	6	10	4761	128569
OVER	GO:0048639	positive regulation of developmental growth	BIOLOGICAL_PROCESS	0.000361773	1.2224e-05	6	10	4761	128569
OVER	GO:0009700	indole phytoalexin biosynthetic process	BIOLOGICAL_PROCESS	0.000361773	1.2224e-05	6	10	4761	128569
OVER	GO:0052314	phytoalexin metabolic process	BIOLOGICAL_PROCESS	0.000361773	1.2224e-05	6	10	4761	128569
OVER	GO:0052315	phytoalexin biosynthetic process	BIOLOGICAL_PROCESS	0.000361773	1.2224e-05	6	10	4761	128569
OVER	GO:0009404	toxin metabolic process	BIOLOGICAL_PROCESS	0.000508119	1.83173e-05	6	11	4761	128568
OVER	GO:0009403	toxin biosynthetic process	BIOLOGICAL_PROCESS	0.000508119	1.83173e-05	6	11	4761	128568
OVER	GO:0010731	protein glutathionylation	BIOLOGICAL_PROCESS	0.00440988	0.000204921	6	19	4761	128560
OVER	GO:1902223	erythrose 4-phosphate/phosphoenolpyruvate family amino acid biosynthetic process	BIOLOGICAL_PROCESS	0.00544319	0.00025835	6	20	4761	128559
OVER	GO:0009094	L-phenylalanine biosynthetic process	BIOLOGICAL_PROCESS	0.00544319	0.00025835	6	20	4761	128559
OVER	GO:0006538	glutamate catabolic process	BIOLOGICAL_PROCESS	0.00810742	0.000397629	6	22	4761	128557
OVER	GO:0046620	regulation of organ growth	BIOLOGICAL_PROCESS	0.00810742	0.000397629	6	22	4761	128557
OVER	GO:0046113	nucleobase catabolic process	BIOLOGICAL_PROCESS	0.00960449	0.000486248	6	23	4761	128556
OVER	GO:0046475	glycerophospholipid catabolic process	BIOLOGICAL_PROCESS	0.000204923	6.50733e-06	5	4	4762	128575
OVER	GO:0052863	1-deoxy-D-xylulose 5-phosphate metabolic process	BIOLOGICAL_PROCESS	0.000368816	1.26287e-05	5	5	4762	128574
OVER	GO:0052865	1-deoxy-D-xylulose 5-phosphate biosynthetic process	BIOLOGICAL_PROCESS	0.000368816	1.26287e-05	5	5	4762	128574
OVER	GO:0006076	(1->3)-beta-D-glucan catabolic process	BIOLOGICAL_PROCESS	0.000368816	1.26287e-05	5	5	4762	128574
OVER	GO:0006145	purine nucleobase catabolic process	BIOLOGICAL_PROCESS	0.000972674	3.7374e-05	5	7	4762	128572
OVER	GO:0009838	abscission	BIOLOGICAL_PROCESS	0.00214522	8.897e-05	5	9	4762	128570
OVER	GO:0010262	somatic embryogenesis	BIOLOGICAL_PROCESS	0.00886845	0.000444976	5	14	4762	128565
OVER	GO:0070328	triglyceride homeostasis	BIOLOGICAL_PROCESS	0.000622986	2.30918e-05	4	2	4763	128577
OVER	GO:0055090	acylglycerol homeostasis	BIOLOGICAL_PROCESS	0.000622986	2.30918e-05	4	2	4763	128577
OVER	GO:0055091	phospholipid homeostasis	BIOLOGICAL_PROCESS	0.000622986	2.30918e-05	4	2	4763	128577
OVER	GO:0055089	fatty acid homeostasis	BIOLOGICAL_PROCESS	0.000622986	2.30918e-05	4	2	4763	128577
OVER	GO:0030574	collagen catabolic process	BIOLOGICAL_PROCESS	0.00395472	0.000177871	4	5	4763	128574
OVER	GO:0051091	positive regulation of DNA-binding transcription factor activity	BIOLOGICAL_PROCESS	0.00601131	0.000288032	4	6	4763	128573
OVER	GO:0051090	regulation of DNA-binding transcription factor activity	BIOLOGICAL_PROCESS	0.00601131	0.000288032	4	6	4763	128573
OVER	GO:0009187	cyclic nucleotide metabolic process	BIOLOGICAL_PROCESS	0.00880392	0.000439784	4	7	4763	128572
OVER	GO:0051176	positive regulation of sulfur metabolic process	BIOLOGICAL_PROCESS	0.00880392	0.000439784	4	7	4763	128572
OVER	GO:0022417	protein maturation by protein folding	BIOLOGICAL_PROCESS	0.00114136	4.56596e-05	3	0	4764	128579
OVER	GO:0098755	maintenance of seed dormancy by absisic acid	BIOLOGICAL_PROCESS	0.00395472	0.000177744	3	1	4764	128578
OVER	GO:0071327	cellular response to trehalose stimulus	BIOLOGICAL_PROCESS	0.00869768	0.000432476	3	2	4764	128577
OVER	GO:0010353	response to trehalose	BIOLOGICAL_PROCESS	0.00869768	0.000432476	3	2	4764	128577
OVER	GO:0010618	aerenchyma formation	BIOLOGICAL_PROCESS	0.00869768	0.000432476	3	2	4764	128577
OVER	GO:0060866	leaf abscission	BIOLOGICAL_PROCESS	0.00869768	0.000432476	3	2	4764	128577
OVER	GO:0080151	positive regulation of salicylic acid mediated signaling pathway	BIOLOGICAL_PROCESS	0.00869768	0.000432476	3	2	4764	128577
OVER	GO:0110165	cellular anatomical entity	CELLULAR_COMPONENT	6.42347e-27	3.62949e-29	2744	63445	2023	65134
OVER	GO:0016020	membrane	CELLULAR_COMPONENT	4.21195e-10	8.04407e-12	1746	41051	3021	87528
OVER	GO:0031224	intrinsic component of membrane	CELLULAR_COMPONENT	2.56786e-21	2.3215e-23	1518	32561	3249	96018
OVER	GO:0016021	integral component of membrane	CELLULAR_COMPONENT	1.31834e-18	1.41532e-20	1482	32191	3285	96388
OVER	GO:0071944	cell periphery	CELLULAR_COMPONENT	2.4049e-52	1.9024e-55	661	9227	4106	119352
OVER	GO:0005886	plasma membrane	CELLULAR_COMPONENT	2.15832e-41	3.17077e-44	567	8114	4200	120465
OVER	GO:0005576	extracellular region	CELLULAR_COMPONENT	8.7491e-25	5.53678e-27	213	2462	4554	126117
OVER	GO:0031226	intrinsic component of plasma membrane	CELLULAR_COMPONENT	2.38367e-10	4.39076e-12	114	1478	4653	127101
OVER	GO:0005618	cell wall	CELLULAR_COMPONENT	2.69774e-13	4.2376e-15	86	851	4681	127728
OVER	GO:0030312	external encapsulating structure	CELLULAR_COMPONENT	6.75646e-13	1.10712e-14	86	867	4681	127712
OVER	GO:0046658	anchored component of plasma membrane	CELLULAR_COMPONENT	3.07994e-08	6.3346e-10	59	620	4708	127959
OVER	GO:0031225	anchored component of membrane	CELLULAR_COMPONENT	9.51284e-08	2.08554e-09	59	642	4708	127937
OVER	GO:0005887	integral component of plasma membrane	CELLULAR_COMPONENT	0.00360539	0.000156455	55	858	4712	127721
OVER	GO:0005782	peroxisomal matrix	CELLULAR_COMPONENT	0.00367208	0.000160594	6	18	4761	128561
OVER	GO:0031907	microbody lumen	CELLULAR_COMPONENT	0.00367208	0.000160594	6	18	4761	128561
OVER	GO:0003824	catalytic activity	MOLECULAR_FUNCTION	1.51369e-140	1.71057e-144	2775	50764	1992	77815
OVER	GO:0005488	binding	MOLECULAR_FUNCTION	4.08636e-12	7.06535e-14	2250	53722	2517	74857
OVER	GO:0043167	ion binding	MOLECULAR_FUNCTION	2.94439e-52	2.6619e-55	1663	31562	3104	97017
OVER	GO:1901363	heterocyclic compound binding	MOLECULAR_FUNCTION	6.88715e-05	2.00801e-06	1568	38244	3199	90335
OVER	GO:0097159	organic cyclic compound binding	MOLECULAR_FUNCTION	9.07273e-05	2.69649e-06	1568	38297	3199	90282
OVER	GO:0016740	transferase activity	MOLECULAR_FUNCTION	1.67301e-36	3.40312e-39	1198	22420	3569	106159
OVER	GO:0036094	small molecule binding	MOLECULAR_FUNCTION	7.14599e-12	1.24362e-13	937	20055	3830	108524
OVER	GO:0043168	anion binding	MOLECULAR_FUNCTION	6.93564e-15	9.79721e-17	935	19407	3832	109172
OVER	GO:1901265	nucleoside phosphate binding	MOLECULAR_FUNCTION	3.50838e-08	7.33474e-10	869	19219	3898	109360
OVER	GO:0000166	nucleotide binding	MOLECULAR_FUNCTION	3.50838e-08	7.33474e-10	869	19219	3898	109360
OVER	GO:0043169	cation binding	MOLECULAR_FUNCTION	6.86654e-33	1.78472e-35	826	14342	3941	114237
OVER	GO:0046872	metal ion binding	MOLECULAR_FUNCTION	8.63555e-33	2.34211e-35	820	14221	3947	114358
OVER	GO:0097367	carbohydrate derivative binding	MOLECULAR_FUNCTION	1.18451e-07	2.67717e-09	794	17495	3973	111084
OVER	GO:0016491	oxidoreductase activity	MOLECULAR_FUNCTION	1.24222e-104	2.80758e-108	775	8602	3992	119977
OVER	GO:0032553	ribonucleotide binding	MOLECULAR_FUNCTION	1.2544e-05	3.35962e-07	766	17346	4001	111233
OVER	GO:0032555	purine ribonucleotide binding	MOLECULAR_FUNCTION	0.0021225	8.77879e-05	728	17157	4039	111422
OVER	GO:0017076	purine nucleotide binding	MOLECULAR_FUNCTION	0.00273103	0.000116969	728	17203	4039	111376
OVER	GO:0032559	adenyl ribonucleotide binding	MOLECULAR_FUNCTION	3.70772e-05	1.03912e-06	708	16033	4059	112546
OVER	GO:0030554	adenyl nucleotide binding	MOLECULAR_FUNCTION	4.83194e-05	1.37603e-06	708	16068	4059	112511
OVER	GO:0035639	purine ribonucleoside triphosphate binding	MOLECULAR_FUNCTION	5.33107e-11	9.57894e-13	686	14136	4081	114443
OVER	GO:0140096	catalytic activity, acting on a protein	MOLECULAR_FUNCTION	0.00209483	8.61698e-05	669	15654	4098	112925
OVER	GO:0005524	ATP binding	MOLECULAR_FUNCTION	8.04128e-15	1.15408e-16	666	13012	4101	115567
OVER	GO:0016772	transferase activity, transferring phosphorus-containing groups	MOLECULAR_FUNCTION	2.84879e-13	4.53927e-15	568	10972	4199	117607
OVER	GO:0016301	kinase activity	MOLECULAR_FUNCTION	5.79055e-19	5.89264e-21	557	9953	4210	118626
OVER	GO:0016773	phosphotransferase activity, alcohol group as acceptor	MOLECULAR_FUNCTION	6.67986e-24	4.52923e-26	514	8477	4253	120102
OVER	GO:0004672	protein kinase activity	MOLECULAR_FUNCTION	1.44182e-26	8.30974e-29	489	7703	4278	120876
OVER	GO:0004674	protein serine/threonine kinase activity	MOLECULAR_FUNCTION	2.31652e-30	8.90062e-33	362	4870	4405	123709
OVER	GO:0046914	transition metal ion binding	MOLECULAR_FUNCTION	2.10074e-14	3.13366e-16	356	6068	4411	122511
OVER	GO:0005215	transporter activity	MOLECULAR_FUNCTION	2.44245e-16	3.11896e-18	354	5824	4413	122755
OVER	GO:0022857	transmembrane transporter activity	MOLECULAR_FUNCTION	5.10113e-16	6.62933e-18	336	5475	4431	123104
OVER	GO:0046906	tetrapyrrole binding	MOLECULAR_FUNCTION	1.53382e-52	1.03999e-55	291	2610	4476	125969
OVER	GO:0098772	molecular function regulator	MOLECULAR_FUNCTION	6.46063e-05	1.87635e-06	283	5723	4484	122856
OVER	GO:0020037	heme binding	MOLECULAR_FUNCTION	1.27153e-50	1.29323e-53	278	2481	4489	126098
OVER	GO:0016757	transferase activity, transferring glycosyl groups	MOLECULAR_FUNCTION	5.5707e-15	7.68025e-17	232	3430	4535	125149
OVER	GO:0140110	transcription regulator activity	MOLECULAR_FUNCTION	2.29473e-12	3.86388e-14	221	3425	4546	125154
OVER	GO:0022804	active transmembrane transporter activity	MOLECULAR_FUNCTION	6.3588e-27	3.52109e-29	217	2428	4550	126151
OVER	GO:0003700	DNA-binding transcription factor activity	MOLECULAR_FUNCTION	3.30702e-15	4.40986e-17	210	2979	4557	125600
OVER	GO:0016705	oxidoreductase activity, acting on paired donors, with incorporation or reduction of molecular oxygen	MOLECULAR_FUNCTION	4.4506e-26	2.66563e-28	195	2095	4572	126484
OVER	GO:0005506	iron ion binding	MOLECULAR_FUNCTION	1.67899e-27	8.48401e-30	194	2016	4573	126563
OVER	GO:0016758	transferase activity, transferring hexosyl groups	MOLECULAR_FUNCTION	8.62202e-23	6.52814e-25	193	2214	4574	126365
OVER	GO:0016829	lyase activity	MOLECULAR_FUNCTION	1.31407e-23	9.20693e-26	183	2004	4584	126575
OVER	GO:0016798	hydrolase activity, acting on glycosyl bonds	MOLECULAR_FUNCTION	1.43708e-16	1.77016e-18	182	2357	4585	126222
OVER	GO:0004497	monooxygenase activity	MOLECULAR_FUNCTION	9.34698e-25	6.02077e-27	180	1903	4587	126676
OVER	GO:0015318	inorganic molecular entity transmembrane transporter activity	MOLECULAR_FUNCTION	0.000333971	1.09826e-05	164	3099	4603	125480
OVER	GO:0015075	ion transmembrane transporter activity	MOLECULAR_FUNCTION	0.000544994	1.97082e-05	163	3113	4604	125466
OVER	GO:0008194	UDP-glycosyltransferase activity	MOLECULAR_FUNCTION	1.53973e-27	7.48201e-30	161	1490	4606	127089
OVER	GO:0004553	hydrolase activity, hydrolyzing O-glycosyl compounds	MOLECULAR_FUNCTION	6.9644e-15	9.91654e-17	159	2035	4608	126544
OVER	GO:0043565	sequence-specific DNA binding	MOLECULAR_FUNCTION	1.9554e-06	4.75978e-08	159	2701	4608	125878
OVER	GO:0030246	carbohydrate binding	MOLECULAR_FUNCTION	7.40304e-18	8.2823e-20	147	1662	4620	126917
OVER	GO:0015291	secondary active transmembrane transporter activity	MOLECULAR_FUNCTION	2.15276e-14	3.25992e-16	123	1419	4644	127160
OVER	GO:0016765	transferase activity, transferring alkyl or aryl (other than methyl) groups	MOLECULAR_FUNCTION	2.10891e-41	2.85987e-44	121	617	4646	127962
OVER	GO:0016209	antioxidant activity	MOLECULAR_FUNCTION	1.25218e-24	8.2073e-27	121	993	4646	127586
OVER	GO:0004601	peroxidase activity	MOLECULAR_FUNCTION	2.47172e-26	1.45247e-28	117	889	4650	127690
OVER	GO:0016684	oxidoreductase activity, acting on peroxide as acceptor	MOLECULAR_FUNCTION	6.11965e-26	3.8036e-28	117	900	4650	127679
OVER	GO:0004364	glutathione transferase activity	MOLECULAR_FUNCTION	1.28856e-68	5.82467e-72	112	245	4655	128334
OVER	GO:0016747	transferase activity, transferring acyl groups other than amino-acyl groups	MOLECULAR_FUNCTION	0.00246731	0.000104595	108	1976	4659	126603
OVER	GO:0005509	calcium ion binding	MOLECULAR_FUNCTION	4.00798e-07	9.33037e-09	98	1389	4669	127190
OVER	GO:0015399	primary active transmembrane transporter activity	MOLECULAR_FUNCTION	1.25629e-12	2.10115e-14	94	1009	4673	127570
OVER	GO:0015077	monovalent inorganic cation transmembrane transporter activity	MOLECULAR_FUNCTION	0.000218538	6.96439e-06	93	1522	4674	127057
OVER	GO:0042626	ATPase-coupled transmembrane transporter activity	MOLECULAR_FUNCTION	1.36449e-13	2.08167e-15	92	935	4675	127644
OVER	GO:0016709	oxidoreductase activity, acting on paired donors, with incorporation or reduction of molecular oxygen, NAD(P)H as one donor, and incorporation of one atom of oxygen	MOLECULAR_FUNCTION	2.93929e-12	5.01563e-14	92	992	4675	127587
OVER	GO:0022853	active ion transmembrane transporter activity	MOLECULAR_FUNCTION	2.24949e-06	5.51633e-08	87	1230	4680	127349
OVER	GO:0051213	dioxygenase activity	MOLECULAR_FUNCTION	3.01772e-17	3.54664e-19	86	715	4681	127864
OVER	GO:0009055	electron transfer activity	MOLECULAR_FUNCTION	1.01565e-08	2.05448e-10	82	991	4685	127588
OVER	GO:0016614	oxidoreductase activity, acting on CH-OH group of donors	MOLECULAR_FUNCTION	9.79652e-08	2.16987e-09	82	1047	4685	127532
OVER	GO:0060089	molecular transducer activity	MOLECULAR_FUNCTION	8.42363e-07	2.02761e-08	80	1068	4687	127511
OVER	GO:0016616	oxidoreductase activity, acting on the CH-OH group of donors, NAD or NADP as acceptor	MOLECULAR_FUNCTION	5.06026e-09	1.01217e-10	77	888	4690	127691
OVER	GO:0015078	proton transmembrane transporter activity	MOLECULAR_FUNCTION	0.000780083	2.93556e-05	77	1247	4690	127332
OVER	GO:0038023	signaling receptor activity	MOLECULAR_FUNCTION	5.36753e-07	1.26773e-08	75	963	4692	127616
OVER	GO:0046527	glucosyltransferase activity	MOLECULAR_FUNCTION	1.70299e-09	3.34864e-11	72	781	4695	127798
OVER	GO:0016835	carbon-oxygen lyase activity	MOLECULAR_FUNCTION	7.98461e-08	1.72936e-09	65	740	4702	127839
OVER	GO:0030145	manganese ion binding	MOLECULAR_FUNCTION	2.42317e-21	2.1633e-23	61	306	4706	128273
OVER	GO:0035251	UDP-glucosyltransferase activity	MOLECULAR_FUNCTION	7.03472e-09	1.41505e-10	60	610	4707	127969
OVER	GO:0015297	antiporter activity	MOLECULAR_FUNCTION	6.26079e-08	1.31598e-09	60	650	4707	127929
OVER	GO:0019199	transmembrane receptor protein kinase activity	MOLECULAR_FUNCTION	2.53866e-06	6.25413e-08	60	730	4707	127849
OVER	GO:0004888	transmembrane signaling receptor activity	MOLECULAR_FUNCTION	1.28941e-05	3.46795e-07	60	771	4707	127808
OVER	GO:0004675	transmembrane receptor protein serine/threonine kinase activity	MOLECULAR_FUNCTION	3.47747e-06	8.80274e-08	59	720	4708	127859
OVER	GO:0016830	carbon-carbon lyase activity	MOLECULAR_FUNCTION	1.05863e-08	2.1534e-10	58	585	4709	127994
OVER	GO:0045735	nutrient reservoir activity	MOLECULAR_FUNCTION	4.73075e-17	5.61339e-19	56	326	4711	128253
OVER	GO:0015293	symporter activity	MOLECULAR_FUNCTION	1.9554e-06	4.77305e-08	54	619	4713	127960
OVER	GO:0015295	solute:proton symporter activity	MOLECULAR_FUNCTION	1.50712e-07	3.44037e-09	53	552	4714	128027
OVER	GO:0015294	solute:cation symporter activity	MOLECULAR_FUNCTION	3.05528e-07	7.078e-09	53	565	4714	128014
OVER	GO:0000287	magnesium ion binding	MOLECULAR_FUNCTION	0.000568833	2.06346e-05	53	751	4714	127828
OVER	GO:0019842	vitamin binding	MOLECULAR_FUNCTION	1.08852e-05	2.89074e-07	51	605	4716	127974
OVER	GO:0050660	flavin adenine dinucleotide binding	MOLECULAR_FUNCTION	0.0055163	0.000262444	50	775	4717	127804
OVER	GO:0016836	hydro-lyase activity	MOLECULAR_FUNCTION	3.23811e-08	6.69651e-10	47	431	4720	128148
OVER	GO:1901681	sulfur compound binding	MOLECULAR_FUNCTION	5.79055e-19	5.9548e-21	45	180	4722	128399
OVER	GO:0030247	polysaccharide binding	MOLECULAR_FUNCTION	3.94754e-05	1.11079e-06	45	529	4722	128050
OVER	GO:0016840	carbon-nitrogen lyase activity	MOLECULAR_FUNCTION	1.37152e-17	1.56541e-19	43	179	4724	128400
OVER	GO:0016903	oxidoreductase activity, acting on the aldehyde or oxo group of donors	MOLECULAR_FUNCTION	4.27777e-10	8.21812e-12	43	318	4724	128261
OVER	GO:0033218	amide binding	MOLECULAR_FUNCTION	2.94921e-05	8.20259e-07	42	471	4725	128108
OVER	GO:0016831	carboxy-lyase activity	MOLECULAR_FUNCTION	9.92778e-08	2.21016e-09	41	358	4726	128221
OVER	GO:0042277	peptide binding	MOLECULAR_FUNCTION	8.39681e-07	2.01167e-08	41	390	4726	128189
OVER	GO:0010181	FMN binding	MOLECULAR_FUNCTION	1.89715e-13	2.91572e-15	38	189	4729	128390
OVER	GO:0080044	quercetin 7-O-glucosyltransferase activity	MOLECULAR_FUNCTION	2.50792e-13	3.9111e-15	38	191	4729	128388
OVER	GO:0080043	quercetin 3-O-glucosyltransferase activity	MOLECULAR_FUNCTION	3.73578e-13	6.03702e-15	38	194	4729	128385
OVER	GO:0030170	pyridoxal phosphate binding	MOLECULAR_FUNCTION	8.4592e-05	2.50459e-06	38	425	4729	128154
OVER	GO:0070279	vitamin B6 binding	MOLECULAR_FUNCTION	8.4592e-05	2.50459e-06	38	425	4729	128154
OVER	GO:1900750	oligopeptide binding	MOLECULAR_FUNCTION	1.12992e-22	8.81054e-25	37	81	4730	128498
OVER	GO:0043295	glutathione binding	MOLECULAR_FUNCTION	1.12992e-22	8.81054e-25	37	81	4730	128498
OVER	GO:0072341	modified amino acid binding	MOLECULAR_FUNCTION	2.74777e-18	3.04308e-20	37	118	4730	128461
OVER	GO:0015926	glucosidase activity	MOLECULAR_FUNCTION	0.000302818	9.92398e-06	37	436	4730	128143
OVER	GO:0005516	calmodulin binding	MOLECULAR_FUNCTION	0.00705184	0.000341077	37	525	4730	128054
OVER	GO:0045548	phenylalanine ammonia-lyase activity	MOLECULAR_FUNCTION	3.3453e-31	1.20974e-33	36	33	4731	128546
OVER	GO:0016841	ammonia-lyase activity	MOLECULAR_FUNCTION	1.20689e-27	5.72825e-30	36	47	4731	128532
OVER	GO:0042910	xenobiotic transmembrane transporter activity	MOLECULAR_FUNCTION	1.05654e-07	2.37599e-09	35	273	4732	128306
OVER	GO:0050662	obsolete coenzyme binding	MOLECULAR_FUNCTION	2.67617e-06	6.65338e-08	35	316	4732	128263
OVER	GO:0008422	beta-glucosidase activity	MOLECULAR_FUNCTION	2.85713e-06	7.13555e-08	35	317	4732	128262
OVER	GO:0008514	organic anion transmembrane transporter activity	MOLECULAR_FUNCTION	0.00120973	4.85316e-05	35	436	4732	128143
OVER	GO:0004568	chitinase activity	MOLECULAR_FUNCTION	8.58606e-22	6.98606e-24	34	68	4733	128511
OVER	GO:0015144	carbohydrate transmembrane transporter activity	MOLECULAR_FUNCTION	0.000600784	2.19294e-05	33	383	4734	128196
OVER	GO:0016667	oxidoreductase activity, acting on a sulfur group of donors	MOLECULAR_FUNCTION	0.00467997	0.00022001	32	418	4735	128161
OVER	GO:0016679	oxidoreductase activity, acting on diphenols and related substances as donors	MOLECULAR_FUNCTION	2.19637e-10	4.02092e-12	31	164	4736	128415
OVER	GO:0004867	serine-type endopeptidase inhibitor activity	MOLECULAR_FUNCTION	0.0084977	0.000417731	31	416	4736	128163
OVER	GO:0008061	chitin binding	MOLECULAR_FUNCTION	2.75484e-17	3.20656e-19	30	74	4737	128505
OVER	GO:0071949	FAD binding	MOLECULAR_FUNCTION	0.00279364	0.000119967	30	367	4737	128212
OVER	GO:0016682	oxidoreductase activity, acting on diphenols and related substances as donors, oxygen as acceptor	MOLECULAR_FUNCTION	3.73287e-11	6.66508e-13	29	131	4738	128448
OVER	GO:0016701	oxidoreductase activity, acting on single donors with incorporation of molecular oxygen	MOLECULAR_FUNCTION	2.67617e-06	6.64918e-08	28	215	4739	128364
OVER	GO:0005342	organic acid transmembrane transporter activity	MOLECULAR_FUNCTION	0.00107006	4.1477e-05	28	310	4739	128269
OVER	GO:0046943	carboxylic acid transmembrane transporter activity	MOLECULAR_FUNCTION	0.00107006	4.1477e-05	28	310	4739	128269
OVER	GO:0015333	peptide:proton symporter activity	MOLECULAR_FUNCTION	0.000722126	2.7093e-05	26	269	4741	128310
OVER	GO:0035673	oligopeptide transmembrane transporter activity	MOLECULAR_FUNCTION	0.00411881	0.000188044	26	306	4741	128273
OVER	GO:0008483	transaminase activity	MOLECULAR_FUNCTION	0.000449978	1.57637e-05	25	244	4742	128335
OVER	GO:0016769	transferase activity, transferring nitrogenous groups	MOLECULAR_FUNCTION	0.000449978	1.57637e-05	25	244	4742	128335
OVER	GO:0005351	carbohydrate:proton symporter activity	MOLECULAR_FUNCTION	0.000474617	1.67878e-05	25	245	4742	128334
OVER	GO:0005402	carbohydrate:cation symporter activity	MOLECULAR_FUNCTION	0.000474617	1.67878e-05	25	245	4742	128334
OVER	GO:0050734	hydroxycinnamoyltransferase activity	MOLECULAR_FUNCTION	6.24561e-19	6.56392e-21	23	25	4744	128554
OVER	GO:0042973	glucan endo-1,3-beta-D-glucosidase activity	MOLECULAR_FUNCTION	2.27948e-13	3.52908e-15	23	56	4744	128523
OVER	GO:0016702	oxidoreductase activity, acting on single donors with incorporation of molecular oxygen, incorporation of two atoms of oxygen	MOLECULAR_FUNCTION	1.74876e-05	4.76271e-07	23	169	4744	128410
OVER	GO:0016860	intramolecular oxidoreductase activity	MOLECULAR_FUNCTION	0.00440965	0.000204312	22	239	4745	128340
OVER	GO:0016623	oxidoreductase activity, acting on the aldehyde or oxo group of donors, oxygen as acceptor	MOLECULAR_FUNCTION	1.7516e-17	2.01902e-19	20	18	4747	128561
OVER	GO:0016628	oxidoreductase activity, acting on the CH-CH group of donors, NAD or NADP as acceptor	MOLECULAR_FUNCTION	0.000196234	6.20923e-06	19	143	4748	128436
OVER	GO:0050162	oxalate oxidase activity	MOLECULAR_FUNCTION	2.74777e-18	3.0344e-20	18	9	4749	128570
OVER	GO:0080030	methyl indole-3-acetate esterase activity	MOLECULAR_FUNCTION	7.98461e-08	1.74147e-09	16	52	4751	128527
OVER	GO:0080031	methyl salicylate esterase activity	MOLECULAR_FUNCTION	7.98461e-08	1.74147e-09	16	52	4751	128527
OVER	GO:0080032	methyl jasmonate esterase activity	MOLECULAR_FUNCTION	7.98461e-08	1.74147e-09	16	52	4751	128527
OVER	GO:0019203	carbohydrate phosphatase activity	MOLECULAR_FUNCTION	0.00197786	8.07115e-05	16	131	4751	128448
OVER	GO:0045156	electron transporter, transferring electrons within the cyclic electron transport pathway of photosynthesis activity	MOLECULAR_FUNCTION	1.30323e-06	3.15167e-08	14	48	4753	128531
OVER	GO:0003955	NAD(P)H dehydrogenase (quinone) activity	MOLECULAR_FUNCTION	4.20167e-06	1.09208e-07	14	54	4753	128525
OVER	GO:0016861	intramolecular oxidoreductase activity, interconverting aldoses and ketoses	MOLECULAR_FUNCTION	0.000391037	1.34337e-05	14	86	4753	128493
OVER	GO:0016671	oxidoreductase activity, acting on a sulfur group of donors, disulfide as acceptor	MOLECULAR_FUNCTION	9.52649e-05	2.84212e-06	13	63	4754	128516
OVER	GO:0004089	carbonate dehydratase activity	MOLECULAR_FUNCTION	0.000349716	1.1619e-05	13	73	4754	128506
OVER	GO:0004805	trehalose-phosphatase activity	MOLECULAR_FUNCTION	0.00176362	7.15491e-05	11	64	4756	128515
OVER	GO:0016629	12-oxophytodienoate reductase activity	MOLECULAR_FUNCTION	6.89019e-08	1.47163e-09	10	12	4757	128567
OVER	GO:0102721	ubiquinol:oxygen oxidoreductase activity	MOLECULAR_FUNCTION	2.92402e-07	6.74088e-09	10	15	4757	128564
OVER	GO:0009916	alternative oxidase activity	MOLECULAR_FUNCTION	4.53144e-07	1.06002e-08	10	16	4757	128563
OVER	GO:0004834	tryptophan synthase activity	MOLECULAR_FUNCTION	7.49304e-05	2.19313e-06	10	33	4757	128546
OVER	GO:0008028	monocarboxylic acid transmembrane transporter activity	MOLECULAR_FUNCTION	0.00342662	0.000147535	10	58	4757	128521
OVER	GO:0004024	alcohol dehydrogenase activity, zinc-dependent	MOLECULAR_FUNCTION	0.00155683	6.28081e-05	9	41	4758	128538
OVER	GO:0051903	S-(hydroxymethyl)glutathione dehydrogenase activity	MOLECULAR_FUNCTION	0.00209679	8.64876e-05	9	43	4758	128536
OVER	GO:0004022	alcohol dehydrogenase (NAD+) activity	MOLECULAR_FUNCTION	0.00440989	0.000206495	9	49	4758	128530
OVER	GO:0018455	alcohol dehydrogenase [NAD(P)+] activity	MOLECULAR_FUNCTION	0.00440989	0.000206495	9	49	4758	128530
OVER	GO:0004640	phosphoribosylanthranilate isomerase activity	MOLECULAR_FUNCTION	5.74109e-07	1.36245e-08	8	7	4759	128572
OVER	GO:0016710	trans-cinnamate 4-monooxygenase activity	MOLECULAR_FUNCTION	5.39094e-06	1.40729e-07	8	11	4759	128568
OVER	GO:0008519	ammonium transmembrane transporter activity	MOLECULAR_FUNCTION	2.91227e-05	8.03022e-07	8	15	4759	128564
OVER	GO:0004084	branched-chain-amino-acid transaminase activity	MOLECULAR_FUNCTION	5.74309e-05	1.66147e-06	8	17	4759	128562
OVER	GO:0008271	secondary active sulfate transmembrane transporter activity	MOLECULAR_FUNCTION	0.00440988	0.000205319	8	38	4759	128541
OVER	GO:0016744	transferase activity, transferring aldehyde or ketonic groups	MOLECULAR_FUNCTION	0.00670317	0.000322697	8	41	4759	128538
OVER	GO:0016621	cinnamoyl-CoA reductase activity	MOLECULAR_FUNCTION	0.00266884	0.000113702	7	25	4760	128554
OVER	GO:0019825	oxygen binding	MOLECULAR_FUNCTION	2.94921e-05	8.23206e-07	6	5	4761	128574
OVER	GO:0052736	beta-glucanase activity	MOLECULAR_FUNCTION	5.5609e-05	1.59619e-06	6	6	4761	128573
OVER	GO:0052861	glucan endo-1,3-beta-glucanase activity, C-3 substituted reducing group	MOLECULAR_FUNCTION	5.5609e-05	1.59619e-06	6	6	4761	128573
OVER	GO:0005344	oxygen carrier activity	MOLECULAR_FUNCTION	0.000242109	7.87971e-06	6	9	4761	128570
OVER	GO:0047634	agmatine N4-coumaroyltransferase activity	MOLECULAR_FUNCTION	0.000242109	7.87971e-06	6	9	4761	128570
OVER	GO:0052654	L-leucine transaminase activity	MOLECULAR_FUNCTION	0.000508119	1.83173e-05	6	11	4761	128568
OVER	GO:0052655	L-valine transaminase activity	MOLECULAR_FUNCTION	0.000508119	1.83173e-05	6	11	4761	128568
OVER	GO:0052656	L-isoleucine transaminase activity	MOLECULAR_FUNCTION	0.000508119	1.83173e-05	6	11	4761	128568
OVER	GO:0004664	prephenate dehydratase activity	MOLECULAR_FUNCTION	0.00225799	9.46677e-05	6	16	4761	128563
OVER	GO:0047769	arogenate dehydratase activity	MOLECULAR_FUNCTION	0.00225799	9.46677e-05	6	16	4761	128563
OVER	GO:0004325	ferrochelatase activity	MOLECULAR_FUNCTION	0.00544319	0.00025835	6	20	4761	128559
OVER	GO:0004351	glutamate decarboxylase activity	MOLECULAR_FUNCTION	0.00810742	0.000397629	6	22	4761	128557
OVER	GO:0008661	1-deoxy-D-xylulose-5-phosphate synthase activity	MOLECULAR_FUNCTION	0.000368816	1.26287e-05	5	5	4762	128574
OVER	GO:0004425	indole-3-glycerol-phosphate synthase activity	MOLECULAR_FUNCTION	0.000613601	2.24666e-05	5	6	4762	128573
OVER	GO:0004049	anthranilate synthase activity	MOLECULAR_FUNCTION	0.00146497	5.89365e-05	5	8	4762	128571
OVER	GO:0016849	phosphorus-oxygen lyase activity	MOLECULAR_FUNCTION	0.00240648	0.000101709	4	4	4763	128575
OVER	GO:0009899	ent-kaurene synthase activity	MOLECULAR_FUNCTION	0.00395472	0.000177871	4	5	4763	128574
OVER	GO:0004851	uroporphyrin-III C-methyltransferase activity	MOLECULAR_FUNCTION	0.00114136	4.56596e-05	3	0	4764	128579
OVER	GO:0033854	glutamate-prephenate aminotransferase activity	MOLECULAR_FUNCTION	0.00114136	4.56596e-05	3	0	4764	128579
OVER	GO:0033853	aspartate-prephenate aminotransferase activity	MOLECULAR_FUNCTION	0.00114136	4.56596e-05	3	0	4764	128579
OVER	GO:0043115	precorrin-2 dehydrogenase activity	MOLECULAR_FUNCTION	0.00114136	4.56596e-05	3	0	4764	128579
OVER	GO:0008936	nicotinamidase activity	MOLECULAR_FUNCTION	0.00114136	4.56596e-05	3	0	4764	128579
OVER	GO:0052862	glucan endo-1,4-beta-glucanase activity, C-3 substituted reducing group	MOLECULAR_FUNCTION	0.00114136	4.56596e-05	3	0	4764	128579
OVER	GO:0004048	anthranilate phosphoribosyltransferase activity	MOLECULAR_FUNCTION	0.00395472	0.000177744	3	1	4764	128578
OVER	GO:0036033	mediator complex binding	MOLECULAR_FUNCTION	0.00395472	0.000177744	3	1	4764	128578
OVER	GO:0003942	N-acetyl-gamma-glutamyl-phosphate reductase activity	MOLECULAR_FUNCTION	0.00395472	0.000177744	3	1	4764	128578

## Sheet: 4H_RC_vs_RI_up
Tags	GO ID	GO Name	GO Category	FDR	P-Value	Nr test	Nr Reference	Non Annotated Test	Non Annotated Ref
OVER	GO:0009987	cellular process	BIOLOGICAL_PROCESS	8.92377e-33	1.21014e-35	2065	61370	1507	68404
OVER	GO:0008152	metabolic process	BIOLOGICAL_PROCESS	6.82077e-35	6.93716e-38	1974	57626	1598	72148
OVER	GO:0071704	organic substance metabolic process	BIOLOGICAL_PROCESS	1.01281e-25	3.20474e-28	1643	47876	1929	81898
OVER	GO:0044237	cellular metabolic process	BIOLOGICAL_PROCESS	1.31388e-19	4.89977e-22	1570	46760	2002	83014
OVER	GO:0044238	primary metabolic process	BIOLOGICAL_PROCESS	8.1676e-17	3.50739e-19	1504	45185	2068	84589
OVER	GO:0006807	nitrogen compound metabolic process	BIOLOGICAL_PROCESS	1.93606e-05	2.51607e-07	1244	40013	2328	89761
OVER	GO:1901564	organonitrogen compound metabolic process	BIOLOGICAL_PROCESS	5.63519e-15	2.48359e-17	948	26714	2624	103060
OVER	GO:0009058	biosynthetic process	BIOLOGICAL_PROCESS	8.24156e-30	1.86271e-32	803	19330	2769	110444
OVER	GO:1901576	organic substance biosynthetic process	BIOLOGICAL_PROCESS	2.12634e-30	4.32525e-33	786	18720	2786	111054
OVER	GO:0044249	cellular biosynthetic process	BIOLOGICAL_PROCESS	9.52167e-27	2.79764e-29	750	18167	2822	111607
OVER	GO:0034641	cellular nitrogen compound metabolic process	BIOLOGICAL_PROCESS	4.34412e-06	5.10553e-08	709	21288	2863	108486
OVER	GO:0044267	cellular protein metabolic process	BIOLOGICAL_PROCESS	0.00948749	0.000289482	620	19739	2952	110035
OVER	GO:0009059	macromolecule biosynthetic process	BIOLOGICAL_PROCESS	7.1419e-09	5.24606e-11	498	13531	3074	116243
OVER	GO:0044271	cellular nitrogen compound biosynthetic process	BIOLOGICAL_PROCESS	3.04507e-09	2.0991e-11	496	13379	3076	116395
OVER	GO:0034645	cellular macromolecule biosynthetic process	BIOLOGICAL_PROCESS	4.43797e-07	4.5137e-09	477	13315	3095	116459
OVER	GO:0050896	response to stimulus	BIOLOGICAL_PROCESS	0.000494911	1.00418e-05	460	13723	3112	116051
OVER	GO:1901566	organonitrogen compound biosynthetic process	BIOLOGICAL_PROCESS	1.41294e-47	1.59672e-51	414	6573	3158	123201
OVER	GO:0071840	cellular component organization or biogenesis	BIOLOGICAL_PROCESS	2.44579e-08	1.96238e-10	390	10240	3182	119534
OVER	GO:0055114	oxidation-reduction process	BIOLOGICAL_PROCESS	1.45682e-12	7.07913e-15	385	9297	3187	120477
OVER	GO:0044281	small molecule metabolic process	BIOLOGICAL_PROCESS	2.59721e-37	2.34802e-40	370	6252	3202	123522
OVER	GO:0016043	cellular component organization	BIOLOGICAL_PROCESS	9.68714e-05	1.49976e-06	325	9058	3247	120716
OVER	GO:0043603	cellular amide metabolic process	BIOLOGICAL_PROCESS	2.44974e-34	2.76838e-37	284	4374	3288	125400
OVER	GO:0019752	carboxylic acid metabolic process	BIOLOGICAL_PROCESS	1.90333e-40	1.07545e-43	274	3782	3298	125992
OVER	GO:0043436	oxoacid metabolic process	BIOLOGICAL_PROCESS	2.71051e-39	1.83784e-42	274	3847	3298	125927
OVER	GO:0006082	organic acid metabolic process	BIOLOGICAL_PROCESS	9.14426e-39	7.23356e-42	274	3879	3298	125895
OVER	GO:0006518	peptide metabolic process	BIOLOGICAL_PROCESS	1.0569e-33	1.31381e-36	257	3788	3315	125986
OVER	GO:0043604	amide biosynthetic process	BIOLOGICAL_PROCESS	9.07395e-33	1.33305e-35	250	3686	3322	126088
OVER	GO:0005975	carbohydrate metabolic process	BIOLOGICAL_PROCESS	5.65176e-21	1.97994e-23	244	4372	3328	125402
OVER	GO:0043043	peptide biosynthetic process	BIOLOGICAL_PROCESS	1.39861e-31	2.37079e-34	232	3348	3340	126426
OVER	GO:0006412	translation	BIOLOGICAL_PROCESS	1.39861e-31	2.23594e-34	229	3279	3343	126495
OVER	GO:0055085	transmembrane transport	BIOLOGICAL_PROCESS	0.00342813	8.91026e-05	223	6244	3349	123530
OVER	GO:0044085	cellular component biogenesis	BIOLOGICAL_PROCESS	1.23111e-11	6.67794e-14	218	4589	3354	125185
OVER	GO:0042221	response to chemical	BIOLOGICAL_PROCESS	0.00391392	0.00010475	210	5846	3362	123928
OVER	GO:0044283	small molecule biosynthetic process	BIOLOGICAL_PROCESS	1.11319e-27	3.01916e-30	182	2460	3390	127314
OVER	GO:0006520	cellular amino acid metabolic process	BIOLOGICAL_PROCESS	1.83244e-31	3.31326e-34	158	1787	3414	127987
OVER	GO:0016053	organic acid biosynthetic process	BIOLOGICAL_PROCESS	2.89892e-29	7.53478e-32	153	1783	3419	127991
OVER	GO:0046394	carboxylic acid biosynthetic process	BIOLOGICAL_PROCESS	2.89892e-29	7.53478e-32	153	1783	3419	127991
OVER	GO:0006629	lipid metabolic process	BIOLOGICAL_PROCESS	0.00213942	5.09979e-05	151	3921	3421	125853
OVER	GO:0070887	cellular response to chemical stimulus	BIOLOGICAL_PROCESS	0.00518626	0.000145349	125	3212	3447	126562
OVER	GO:1901135	carbohydrate derivative metabolic process	BIOLOGICAL_PROCESS	8.27171e-05	1.25258e-06	119	2701	3453	127073
OVER	GO:0071554	cell wall organization or biogenesis	BIOLOGICAL_PROCESS	4.15586e-17	1.69071e-19	116	1580	3456	128194
OVER	GO:0022607	cellular component assembly	BIOLOGICAL_PROCESS	0.00901037	0.000270851	115	2958	3457	126816
OVER	GO:0044262	cellular carbohydrate metabolic process	BIOLOGICAL_PROCESS	3.47331e-13	1.57003e-15	112	1715	3460	128059
OVER	GO:0032787	monocarboxylic acid metabolic process	BIOLOGICAL_PROCESS	5.70735e-10	3.61184e-12	107	1825	3465	127949
OVER	GO:0005976	polysaccharide metabolic process	BIOLOGICAL_PROCESS	9.65427e-12	5.01861e-14	100	1531	3472	128243
OVER	GO:1901605	alpha-amino acid metabolic process	BIOLOGICAL_PROCESS	1.61896e-20	5.85453e-23	98	1061	3474	128713
OVER	GO:0034660	ncRNA metabolic process	BIOLOGICAL_PROCESS	8.66567e-06	1.04783e-07	93	1852	3479	127922
OVER	GO:0022613	ribonucleoprotein complex biogenesis	BIOLOGICAL_PROCESS	2.12504e-07	2.01721e-09	92	1668	3480	128106
OVER	GO:0008610	lipid biosynthetic process	BIOLOGICAL_PROCESS	0.000469086	9.38278e-06	91	2019	3481	127755
OVER	GO:0065003	protein-containing complex assembly	BIOLOGICAL_PROCESS	0.00691932	0.000197047	89	2150	3483	127624
OVER	GO:0044264	cellular polysaccharide metabolic process	BIOLOGICAL_PROCESS	7.21784e-13	3.34424e-15	87	1174	3485	128600
OVER	GO:0045229	external encapsulating structure organization	BIOLOGICAL_PROCESS	6.10333e-12	3.10374e-14	85	1181	3487	128593
OVER	GO:0055086	nucleobase-containing small molecule metabolic process	BIOLOGICAL_PROCESS	0.000167414	2.76217e-06	82	1705	3490	128069
OVER	GO:0034622	cellular protein-containing complex assembly	BIOLOGICAL_PROCESS	0.0062412	0.00017562	81	1907	3491	127867
OVER	GO:0071555	cell wall organization	BIOLOGICAL_PROCESS	1.116e-11	5.92747e-14	80	1087	3492	128687
OVER	GO:0008652	cellular amino acid biosynthetic process	BIOLOGICAL_PROCESS	1.25595e-21	4.25793e-24	79	685	3493	129089
OVER	GO:0016051	carbohydrate biosynthetic process	BIOLOGICAL_PROCESS	4.16663e-10	2.54264e-12	77	1109	3495	128665
OVER	GO:0042254	ribosome biogenesis	BIOLOGICAL_PROCESS	4.61028e-07	4.84525e-09	77	1323	3495	128451
OVER	GO:1901607	alpha-amino acid biosynthetic process	BIOLOGICAL_PROCESS	4.07198e-17	1.61057e-19	67	614	3505	129160
OVER	GO:0006790	sulfur compound metabolic process	BIOLOGICAL_PROCESS	1.31233e-06	1.45336e-08	67	1114	3505	128660
OVER	GO:0072330	monocarboxylic acid biosynthetic process	BIOLOGICAL_PROCESS	1.89294e-07	1.7755e-09	62	936	3510	128838
OVER	GO:0006753	nucleoside phosphate metabolic process	BIOLOGICAL_PROCESS	0.0087373	0.00025937	62	1383	3510	128391
OVER	GO:0009117	nucleotide metabolic process	BIOLOGICAL_PROCESS	0.0098637	0.000312107	61	1365	3511	128409
OVER	GO:0000271	polysaccharide biosynthetic process	BIOLOGICAL_PROCESS	1.01718e-09	6.55205e-12	60	763	3512	129011
OVER	GO:0034637	cellular carbohydrate biosynthetic process	BIOLOGICAL_PROCESS	2.66699e-08	2.17e-10	60	839	3512	128935
OVER	GO:0044042	glucan metabolic process	BIOLOGICAL_PROCESS	3.08615e-07	2.99931e-09	60	904	3512	128870
OVER	GO:0006073	cellular glucan metabolic process	BIOLOGICAL_PROCESS	3.08615e-07	2.99931e-09	60	904	3512	128870
OVER	GO:0016052	carbohydrate catabolic process	BIOLOGICAL_PROCESS	3.85677e-05	5.53303e-07	60	1061	3512	128713
OVER	GO:0006820	anion transport	BIOLOGICAL_PROCESS	0.00219493	5.28331e-05	59	1218	3513	128556
OVER	GO:0042546	cell wall biogenesis	BIOLOGICAL_PROCESS	3.68003e-11	2.07935e-13	57	639	3515	129135
OVER	GO:0009657	plastid organization	BIOLOGICAL_PROCESS	3.80825e-12	1.89358e-14	54	545	3518	129229
OVER	GO:0033692	cellular polysaccharide biosynthetic process	BIOLOGICAL_PROCESS	1.06225e-08	8.04283e-11	54	689	3518	129085
OVER	GO:0044036	cell wall macromolecule metabolic process	BIOLOGICAL_PROCESS	3.12428e-09	2.18901e-11	53	643	3519	129131
OVER	GO:0006399	tRNA metabolic process	BIOLOGICAL_PROCESS	0.00034692	6.54713e-06	52	947	3520	128827
OVER	GO:0007010	cytoskeleton organization	BIOLOGICAL_PROCESS	0.00111627	2.42201e-05	51	971	3521	128803
OVER	GO:0098869	cellular oxidant detoxification	BIOLOGICAL_PROCESS	0.00985009	0.00030945	51	1084	3521	128690
OVER	GO:0006631	fatty acid metabolic process	BIOLOGICAL_PROCESS	4.18202e-05	6.04926e-07	48	771	3524	129003
OVER	GO:0010383	cell wall polysaccharide metabolic process	BIOLOGICAL_PROCESS	1.9246e-08	1.47896e-10	46	538	3526	129236
OVER	GO:0015711	organic anion transport	BIOLOGICAL_PROCESS	0.000218172	3.74756e-06	45	754	3527	129020
OVER	GO:0010410	hemicellulose metabolic process	BIOLOGICAL_PROCESS	7.23678e-08	6.3789e-10	42	485	3530	129289
OVER	GO:0022618	ribonucleoprotein complex assembly	BIOLOGICAL_PROCESS	7.15938e-05	1.05987e-06	41	623	3531	129151
OVER	GO:0071826	ribonucleoprotein complex subunit organization	BIOLOGICAL_PROCESS	0.000137872	2.21244e-06	41	643	3531	129131
OVER	GO:0006633	fatty acid biosynthetic process	BIOLOGICAL_PROCESS	1.56759e-05	1.98406e-07	40	559	3532	129215
OVER	GO:0009658	chloroplast organization	BIOLOGICAL_PROCESS	2.4395e-08	1.92976e-10	39	408	3533	129366
OVER	GO:0002181	cytoplasmic translation	BIOLOGICAL_PROCESS	3.2596e-10	1.87863e-12	36	295	3536	129479
OVER	GO:0043648	dicarboxylic acid metabolic process	BIOLOGICAL_PROCESS	6.49747e-09	4.65991e-11	36	334	3536	129440
OVER	GO:0009832	plant-type cell wall biogenesis	BIOLOGICAL_PROCESS	3.24917e-08	2.68041e-10	36	358	3536	129416
OVER	GO:0071669	plant-type cell wall organization or biogenesis	BIOLOGICAL_PROCESS	6.10881e-08	5.31561e-10	36	368	3536	129406
OVER	GO:0007178	transmembrane receptor protein serine/threonine kinase signaling pathway	BIOLOGICAL_PROCESS	0.00222974	5.41749e-05	36	619	3536	129155
OVER	GO:0007167	enzyme linked receptor protein signaling pathway	BIOLOGICAL_PROCESS	0.00222974	5.41749e-05	36	619	3536	129155
OVER	GO:0009250	glucan biosynthetic process	BIOLOGICAL_PROCESS	0.000275668	4.98439e-06	35	526	3537	129248
OVER	GO:0019748	secondary metabolic process	BIOLOGICAL_PROCESS	0.00244716	6.05637e-05	35	598	3537	129176
OVER	GO:0043039	tRNA aminoacylation	BIOLOGICAL_PROCESS	4.43886e-07	4.61492e-09	34	364	3538	129410
OVER	GO:0043038	amino acid activation	BIOLOGICAL_PROCESS	4.43886e-07	4.61492e-09	34	364	3538	129410
OVER	GO:0009072	aromatic amino acid family metabolic process	BIOLOGICAL_PROCESS	1.77961e-07	1.64909e-09	33	330	3539	129444
OVER	GO:0051273	beta-glucan metabolic process	BIOLOGICAL_PROCESS	2.16204e-06	2.41883e-08	33	372	3539	129402
OVER	GO:0009698	phenylpropanoid metabolic process	BIOLOGICAL_PROCESS	7.8374e-06	9.38823e-08	33	396	3539	129378
OVER	GO:0009064	glutamine family amino acid metabolic process	BIOLOGICAL_PROCESS	1.44611e-07	1.3237e-09	32	309	3540	129465
OVER	GO:0009408	response to heat	BIOLOGICAL_PROCESS	0.00932005	0.00028332	32	575	3540	129199
OVER	GO:0006418	tRNA aminoacylation for protein translation	BIOLOGICAL_PROCESS	1.24039e-05	1.51779e-07	30	345	3542	129429
OVER	GO:0006575	cellular modified amino acid metabolic process	BIOLOGICAL_PROCESS	0.0098637	0.000311409	30	528	3542	129246
OVER	GO:0042273	ribosomal large subunit biogenesis	BIOLOGICAL_PROCESS	1.73949e-05	2.2213e-07	29	332	3543	129442
OVER	GO:0009073	aromatic amino acid family biosynthetic process	BIOLOGICAL_PROCESS	1.91064e-09	1.2955e-11	27	178	3545	129596
OVER	GO:0030243	cellulose metabolic process	BIOLOGICAL_PROCESS	1.98829e-05	2.60642e-07	27	296	3545	129478
OVER	GO:0044272	sulfur compound biosynthetic process	BIOLOGICAL_PROCESS	0.00159675	3.5367e-05	27	394	3545	129380
OVER	GO:0045491	xylan metabolic process	BIOLOGICAL_PROCESS	5.32564e-06	6.31927e-08	26	256	3546	129518
OVER	GO:0044038	cell wall macromolecule biosynthetic process	BIOLOGICAL_PROCESS	1.24039e-05	1.54191e-07	26	269	3546	129505
OVER	GO:0070589	cellular component macromolecule biosynthetic process	BIOLOGICAL_PROCESS	1.24039e-05	1.54191e-07	26	269	3546	129505
OVER	GO:0042255	ribosome assembly	BIOLOGICAL_PROCESS	3.73594e-05	5.1507e-07	26	288	3546	129486
OVER	GO:0006090	pyruvate metabolic process	BIOLOGICAL_PROCESS	0.00801765	0.000231949	26	421	3546	129353
OVER	GO:0042440	pigment metabolic process	BIOLOGICAL_PROCESS	0.00719142	0.000206421	25	394	3547	129380
OVER	GO:0009066	aspartate family amino acid metabolic process	BIOLOGICAL_PROCESS	1.86774e-05	2.40618e-07	24	239	3548	129535
OVER	GO:0070592	cell wall polysaccharide biosynthetic process	BIOLOGICAL_PROCESS	7.79491e-05	1.16276e-06	24	263	3548	129511
OVER	GO:0051274	beta-glucan biosynthetic process	BIOLOGICAL_PROCESS	0.000111481	1.77634e-06	24	270	3548	129504
OVER	GO:0009132	nucleoside diphosphate metabolic process	BIOLOGICAL_PROCESS	0.00514663	0.000143075	24	361	3548	129413
OVER	GO:0009063	cellular amino acid catabolic process	BIOLOGICAL_PROCESS	0.00255471	6.35141e-05	23	319	3549	129455
OVER	GO:0046148	pigment biosynthetic process	BIOLOGICAL_PROCESS	0.00383963	0.000101968	23	330	3549	129444
OVER	GO:0009834	plant-type secondary cell wall biogenesis	BIOLOGICAL_PROCESS	2.2916e-06	2.58967e-08	22	177	3550	129597
OVER	GO:1901264	carbohydrate derivative transport	BIOLOGICAL_PROCESS	0.00309684	7.8742e-05	22	302	3550	129472
OVER	GO:0006766	vitamin metabolic process	BIOLOGICAL_PROCESS	0.00517894	0.000144559	22	316	3550	129458
OVER	GO:0009808	lignin metabolic process	BIOLOGICAL_PROCESS	0.000369648	7.07641e-06	21	235	3551	129539
OVER	GO:0006458	'de novo' protein folding	BIOLOGICAL_PROCESS	0.00174615	3.90709e-05	21	266	3551	129508
OVER	GO:0042274	ribosomal small subunit biogenesis	BIOLOGICAL_PROCESS	0.00190209	4.32048e-05	21	268	3551	129506
OVER	GO:1901606	alpha-amino acid catabolic process	BIOLOGICAL_PROCESS	0.00255956	6.3924e-05	21	276	3551	129498
OVER	GO:0033014	tetrapyrrole biosynthetic process	BIOLOGICAL_PROCESS	3.02373e-05	4.0321e-07	20	176	3552	129598
OVER	GO:0009069	serine family amino acid metabolic process	BIOLOGICAL_PROCESS	0.000830716	1.76488e-05	20	231	3552	129543
OVER	GO:0033013	tetrapyrrole metabolic process	BIOLOGICAL_PROCESS	0.00212822	4.97185e-05	20	250	3552	129524
OVER	GO:0061077	chaperone-mediated protein folding	BIOLOGICAL_PROCESS	0.00501104	0.000138173	20	271	3552	129503
OVER	GO:0030244	cellulose biosynthetic process	BIOLOGICAL_PROCESS	0.000508699	1.04051e-05	19	203	3553	129571
OVER	GO:0006778	porphyrin-containing compound metabolic process	BIOLOGICAL_PROCESS	0.00378675	0.000100136	19	243	3553	129531
OVER	GO:0044275	cellular carbohydrate catabolic process	BIOLOGICAL_PROCESS	0.00632731	0.000178758	19	255	3553	129519
OVER	GO:0006767	water-soluble vitamin metabolic process	BIOLOGICAL_PROCESS	0.00841061	0.000246169	19	262	3553	129512
OVER	GO:0006414	translational elongation	BIOLOGICAL_PROCESS	0.0089863	0.000269112	19	264	3553	129510
OVER	GO:0006779	porphyrin-containing compound biosynthetic process	BIOLOGICAL_PROCESS	0.000176502	2.97195e-06	18	167	3554	129607
OVER	GO:0009067	aspartate family amino acid biosynthetic process	BIOLOGICAL_PROCESS	0.000316941	5.80229e-06	18	176	3554	129598
OVER	GO:0000096	sulfur amino acid metabolic process	BIOLOGICAL_PROCESS	0.00407478	0.000109594	18	224	3554	129550
OVER	GO:0006541	glutamine metabolic process	BIOLOGICAL_PROCESS	0.00101671	2.19451e-05	17	177	3555	129597
OVER	GO:0015995	chlorophyll biosynthetic process	BIOLOGICAL_PROCESS	3.41189e-05	4.62682e-07	16	114	3556	129660
OVER	GO:0045492	xylan biosynthetic process	BIOLOGICAL_PROCESS	9.80844e-05	1.52962e-06	16	126	3556	129648
OVER	GO:0009070	serine family amino acid biosynthetic process	BIOLOGICAL_PROCESS	0.00184515	4.14946e-05	16	168	3556	129606
OVER	GO:0042401	cellular biogenic amine biosynthetic process	BIOLOGICAL_PROCESS	0.00193122	4.43031e-05	16	169	3556	129605
OVER	GO:0009309	amine biosynthetic process	BIOLOGICAL_PROCESS	0.00193122	4.43031e-05	16	169	3556	129605
OVER	GO:0015994	chlorophyll metabolic process	BIOLOGICAL_PROCESS	0.00325067	8.30209e-05	16	179	3556	129595
OVER	GO:0000027	ribosomal large subunit assembly	BIOLOGICAL_PROCESS	0.00189168	4.27547e-05	15	150	3557	129624
OVER	GO:0009081	branched-chain amino acid metabolic process	BIOLOGICAL_PROCESS	0.00060065	1.24895e-05	14	117	3558	129657
OVER	GO:0001732	formation of cytoplasmic translation initiation complex	BIOLOGICAL_PROCESS	0.000794037	1.66004e-05	13	104	3559	129670
OVER	GO:0010027	thylakoid membrane organization	BIOLOGICAL_PROCESS	0.00297289	7.52546e-05	13	122	3559	129652
OVER	GO:0009668	plastid membrane organization	BIOLOGICAL_PROCESS	0.00297289	7.52546e-05	13	122	3559	129652
OVER	GO:0002183	cytoplasmic translational initiation	BIOLOGICAL_PROCESS	0.00976466	0.000300146	13	142	3559	129632
OVER	GO:0072598	protein localization to chloroplast	BIOLOGICAL_PROCESS	0.00829601	0.00024127	12	120	3560	129654
OVER	GO:0009082	branched-chain amino acid biosynthetic process	BIOLOGICAL_PROCESS	7.89115e-05	1.18603e-06	11	54	3561	129720
OVER	GO:0043572	plastid fission	BIOLOGICAL_PROCESS	0.000155863	2.53636e-06	11	59	3561	129715
OVER	GO:0010020	chloroplast fission	BIOLOGICAL_PROCESS	0.000155863	2.53636e-06	11	59	3561	129715
OVER	GO:0046219	indolalkylamine biosynthetic process	BIOLOGICAL_PROCESS	0.000383395	7.49546e-06	11	67	3561	129707
OVER	GO:0000162	tryptophan biosynthetic process	BIOLOGICAL_PROCESS	0.000383395	7.49546e-06	11	67	3561	129707
OVER	GO:0010143	cutin biosynthetic process	BIOLOGICAL_PROCESS	0.000477949	9.61407e-06	11	69	3561	129705
OVER	GO:0072596	establishment of protein localization to chloroplast	BIOLOGICAL_PROCESS	0.00918925	0.000278305	11	104	3561	129670
OVER	GO:0045036	protein targeting to chloroplast	BIOLOGICAL_PROCESS	0.00918925	0.000278305	11	104	3561	129670
OVER	GO:0006525	arginine metabolic process	BIOLOGICAL_PROCESS	0.00213878	5.0273e-05	10	69	3562	129705
OVER	GO:0006782	protoporphyrinogen IX biosynthetic process	BIOLOGICAL_PROCESS	0.00213942	5.12552e-05	9	55	3563	129719
OVER	GO:0046501	protoporphyrinogen IX metabolic process	BIOLOGICAL_PROCESS	0.00213942	5.12552e-05	9	55	3563	129719
OVER	GO:0009085	lysine biosynthetic process	BIOLOGICAL_PROCESS	0.0069582	0.00019894	9	67	3563	129707
OVER	GO:0032544	plastid translation	BIOLOGICAL_PROCESS	0.000334496	6.27488e-06	8	30	3564	129744
OVER	GO:0009065	glutamine family amino acid catabolic process	BIOLOGICAL_PROCESS	0.00438295	0.000118873	8	48	3564	129726
OVER	GO:0009089	lysine biosynthetic process via diaminopimelate	BIOLOGICAL_PROCESS	0.0097944	0.000306594	8	56	3564	129718
OVER	GO:0046417	chorismate metabolic process	BIOLOGICAL_PROCESS	0.0097944	0.000306594	8	56	3564	129718
OVER	GO:0046451	diaminopimelate metabolic process	BIOLOGICAL_PROCESS	0.0097944	0.000306594	8	56	3564	129718
OVER	GO:1901259	chloroplast rRNA processing	BIOLOGICAL_PROCESS	0.00829601	0.000241877	7	40	3565	129734
OVER	GO:0015867	ATP transport	BIOLOGICAL_PROCESS	0.0097944	0.000306326	6	29	3566	129745
OVER	GO:0110165	cellular anatomical entity	CELLULAR_COMPONENT	4.89898e-30	1.05188e-32	2122	64067	1450	65707
OVER	GO:0016020	membrane	CELLULAR_COMPONENT	1.81789e-09	1.21206e-11	1333	41464	2239	88310
OVER	GO:0031224	intrinsic component of membrane	CELLULAR_COMPONENT	3.33067e-11	1.84431e-13	1104	32975	2468	96799
OVER	GO:0016021	integral component of membrane	CELLULAR_COMPONENT	3.98807e-10	2.38861e-12	1083	32590	2489	97184
OVER	GO:0005622	intracellular	CELLULAR_COMPONENT	1.15825e-09	7.59168e-12	1043	31378	2529	98396
OVER	GO:0005737	cytoplasm	CELLULAR_COMPONENT	2.66084e-27	7.51736e-30	901	22779	2671	106995
OVER	GO:0043226	organelle	CELLULAR_COMPONENT	5.72745e-07	6.14881e-09	758	22637	2814	107137
OVER	GO:0043229	intracellular organelle	CELLULAR_COMPONENT	9.19815e-08	8.2117e-10	736	21630	2836	108144
OVER	GO:0043227	membrane-bounded organelle	CELLULAR_COMPONENT	8.40871e-07	9.21736e-09	667	19644	2905	110130
OVER	GO:0043231	intracellular membrane-bounded organelle	CELLULAR_COMPONENT	2.07667e-08	1.61928e-10	636	18121	2936	111653
OVER	GO:0009536	plastid	CELLULAR_COMPONENT	3.3981e-46	7.68019e-50	405	6464	3167	123310
OVER	GO:0009507	chloroplast	CELLULAR_COMPONENT	7.20696e-46	3.25775e-49	394	6239	3178	123535
OVER	GO:0071944	cell periphery	CELLULAR_COMPONENT	8.0576e-13	3.82438e-15	393	9495	3179	120279
OVER	GO:0005886	plasma membrane	CELLULAR_COMPONENT	5.12892e-10	3.18783e-12	339	8342	3233	121432
OVER	GO:0005829	cytosol	CELLULAR_COMPONENT	0.000234294	4.05096e-06	184	4719	3388	125055
OVER	GO:0031975	envelope	CELLULAR_COMPONENT	3.85677e-05	5.5352e-07	122	2739	3450	127035
OVER	GO:0031967	organelle envelope	CELLULAR_COMPONENT	3.85677e-05	5.5352e-07	122	2739	3450	127035
OVER	GO:0009532	plastid stroma	CELLULAR_COMPONENT	1.17233e-26	3.57701e-29	119	1231	3453	128543
OVER	GO:0009570	chloroplast stroma	CELLULAR_COMPONENT	3.55565e-25	1.16526e-27	115	1210	3457	128564
OVER	GO:0005576	extracellular region	CELLULAR_COMPONENT	0.00499493	0.000137164	104	2571	3468	127203
OVER	GO:0009526	plastid envelope	CELLULAR_COMPONENT	3.86799e-17	1.48617e-19	96	1158	3476	128616
OVER	GO:0009941	chloroplast envelope	CELLULAR_COMPONENT	7.25867e-17	3.03504e-19	94	1131	3478	128643
OVER	GO:0005794	Golgi apparatus	CELLULAR_COMPONENT	0.00210137	4.86813e-05	78	1743	3494	128031
OVER	GO:0031226	intrinsic component of plasma membrane	CELLULAR_COMPONENT	9.83074e-05	1.54421e-06	76	1516	3496	128258
OVER	GO:0005856	cytoskeleton	CELLULAR_COMPONENT	0.00212822	4.97842e-05	57	1161	3515	128613
OVER	GO:0005840	ribosome	CELLULAR_COMPONENT	0.00967336	0.000296246	55	1193	3517	128581
OVER	GO:0030312	external encapsulating structure	CELLULAR_COMPONENT	2.70713e-05	3.57932e-07	54	899	3518	128875
OVER	GO:0005618	cell wall	CELLULAR_COMPONENT	3.52055e-05	4.81395e-07	53	884	3519	128890
OVER	GO:0000139	Golgi membrane	CELLULAR_COMPONENT	0.00842397	0.000247512	51	1073	3521	128701
OVER	GO:0031225	anchored component of membrane	CELLULAR_COMPONENT	3.7241e-06	4.25058e-08	46	655	3526	129119
OVER	GO:0046658	anchored component of plasma membrane	CELLULAR_COMPONENT	3.86238e-06	4.45206e-08	45	634	3527	129140
OVER	GO:0042170	plastid membrane	CELLULAR_COMPONENT	9.92355e-09	7.40145e-11	43	468	3529	129306
OVER	GO:0031969	chloroplast membrane	CELLULAR_COMPONENT	6.49747e-09	4.69927e-11	42	442	3530	129332
OVER	GO:0099081	supramolecular polymer	CELLULAR_COMPONENT	0.000240059	4.25916e-06	40	638	3532	129136
OVER	GO:0099512	supramolecular fiber	CELLULAR_COMPONENT	0.000240059	4.25916e-06	40	638	3532	129136
OVER	GO:0099513	polymeric cytoskeletal fiber	CELLULAR_COMPONENT	0.000240059	4.25916e-06	40	638	3532	129136
OVER	GO:0005874	microtubule	CELLULAR_COMPONENT	0.000212812	3.63144e-06	39	610	3533	129164
OVER	GO:0009527	plastid outer membrane	CELLULAR_COMPONENT	0.00798453	0.000230089	16	197	3556	129577
OVER	GO:0009706	chloroplast inner membrane	CELLULAR_COMPONENT	0.000324107	6.00673e-06	14	109	3558	129665
OVER	GO:0009528	plastid inner membrane	CELLULAR_COMPONENT	0.000552957	1.14353e-05	14	116	3558	129658
OVER	GO:0033290	eukaryotic 48S preinitiation complex	CELLULAR_COMPONENT	0.000307909	5.60214e-06	13	93	3559	129681
OVER	GO:0070993	translation preinitiation complex	CELLULAR_COMPONENT	0.000363405	6.89932e-06	13	95	3559	129679
OVER	GO:0005852	eukaryotic translation initiation factor 3 complex	CELLULAR_COMPONENT	0.000830716	1.76156e-05	12	89	3560	129685
OVER	GO:0016282	eukaryotic 43S preinitiation complex	CELLULAR_COMPONENT	0.000830716	1.76156e-05	12	89	3560	129685
OVER	GO:0042788	polysomal ribosome	CELLULAR_COMPONENT	0.000369648	7.10138e-06	7	21	3565	129753
OVER	GO:0009368	endopeptidase Clp complex	CELLULAR_COMPONENT	0.0087373	0.00025968	6	28	3566	129746
OVER	GO:0003824	catalytic activity	MOLECULAR_FUNCTION	6.27365e-46	2.1269e-49	1865	51674	1707	78100
OVER	GO:0005488	binding	MOLECULAR_FUNCTION	0.000393564	7.73875e-06	1626	54346	1946	75428
OVER	GO:0043167	ion binding	MOLECULAR_FUNCTION	3.27857e-07	3.22337e-09	1041	32184	2531	97590
OVER	GO:0016740	transferase activity	MOLECULAR_FUNCTION	4.85643e-08	4.0612e-10	775	22843	2797	106931
OVER	GO:0036094	small molecule binding	MOLECULAR_FUNCTION	0.000179014	3.03448e-06	662	20330	2910	109444
OVER	GO:0043168	anion binding	MOLECULAR_FUNCTION	0.000331143	6.17455e-06	640	19702	2932	110072
OVER	GO:0016787	hydrolase activity	MOLECULAR_FUNCTION	1.27978e-07	1.15699e-09	605	17332	2967	112442
OVER	GO:0035639	purine ribonucleoside triphosphate binding	MOLECULAR_FUNCTION	4.30605e-07	4.30277e-09	508	14314	3064	115460
OVER	GO:0043169	cation binding	MOLECULAR_FUNCTION	0.000853502	1.82294e-05	486	14682	3086	115092
OVER	GO:0046872	metal ion binding	MOLECULAR_FUNCTION	0.000911253	1.95658e-05	482	14559	3090	115215
OVER	GO:0005524	ATP binding	MOLECULAR_FUNCTION	1.41136e-05	1.77038e-07	461	13217	3111	116557
OVER	GO:0016491	oxidoreductase activity	MOLECULAR_FUNCTION	3.90721e-10	2.29602e-12	362	9015	3210	120759
OVER	GO:0005215	transporter activity	MOLECULAR_FUNCTION	0.0036401	9.58462e-05	214	5964	3358	123810
OVER	GO:0003723	RNA binding	MOLECULAR_FUNCTION	0.00203849	4.69941e-05	212	5823	3360	123951
OVER	GO:0022857	transmembrane transporter activity	MOLECULAR_FUNCTION	0.00268404	6.7336e-05	204	5607	3368	124167
OVER	GO:0005198	structural molecule activity	MOLECULAR_FUNCTION	1.90782e-29	4.52754e-32	160	1914	3412	127860
OVER	GO:0016757	transferase activity, transferring glycosyl groups	MOLECULAR_FUNCTION	5.48456e-07	5.82607e-09	158	3504	3414	126270
OVER	GO:0003735	structural constituent of ribosome	MOLECULAR_FUNCTION	3.33276e-31	6.40264e-34	145	1548	3427	128226
OVER	GO:0016798	hydrolase activity, acting on glycosyl bonds	MOLECULAR_FUNCTION	5.45774e-08	4.62573e-10	123	2416	3449	127358
OVER	GO:0022804	active transmembrane transporter activity	MOLECULAR_FUNCTION	8.56879e-05	1.30725e-06	113	2532	3459	127242
OVER	GO:0016829	lyase activity	MOLECULAR_FUNCTION	5.73756e-08	4.92772e-10	110	2077	3462	127697
OVER	GO:0004553	hydrolase activity, hydrolyzing O-glycosyl compounds	MOLECULAR_FUNCTION	4.30605e-07	4.33087e-09	107	2087	3465	127687
OVER	GO:0016758	transferase activity, transferring hexosyl groups	MOLECULAR_FUNCTION	3.07281e-05	4.13227e-07	107	2300	3465	127474
OVER	GO:0016746	transferase activity, transferring acyl groups	MOLECULAR_FUNCTION	0.000401618	7.9425e-06	97	2180	3475	127594
OVER	GO:0008194	UDP-glycosyltransferase activity	MOLECULAR_FUNCTION	0.000494911	1.00671e-05	75	1576	3497	128198
OVER	GO:0016853	isomerase activity	MOLECULAR_FUNCTION	3.92308e-06	4.56636e-08	69	1200	3503	128574
OVER	GO:0015291	secondary active transmembrane transporter activity	MOLECULAR_FUNCTION	0.00159675	3.52526e-05	69	1473	3503	128301
OVER	GO:0016614	oxidoreductase activity, acting on CH-OH group of donors	MOLECULAR_FUNCTION	9.44847e-05	1.45213e-06	59	1070	3513	128704
OVER	GO:0016616	oxidoreductase activity, acting on the CH-OH group of donors, NAD or NADP as acceptor	MOLECULAR_FUNCTION	0.000533698	1.09767e-05	50	915	3522	128859
OVER	GO:0038023	signaling receptor activity	MOLECULAR_FUNCTION	0.00479457	0.000131121	49	989	3523	128785
OVER	GO:0046527	glucosyltransferase activity	MOLECULAR_FUNCTION	0.000237395	4.13141e-06	47	806	3525	128968
OVER	GO:0140101	catalytic activity, acting on a tRNA	MOLECULAR_FUNCTION	5.31666e-05	7.79068e-07	46	731	3526	129043
OVER	GO:0016830	carbon-carbon lyase activity	MOLECULAR_FUNCTION	8.28837e-07	8.99179e-09	45	598	3527	129176
OVER	GO:0016765	transferase activity, transferring alkyl or aryl (other than methyl) groups	MOLECULAR_FUNCTION	0.000159583	2.61493e-06	43	695	3529	129079
OVER	GO:0008509	anion transmembrane transporter activity	MOLECULAR_FUNCTION	0.00174615	3.89232e-05	43	783	3529	128991
OVER	GO:0019842	vitamin binding	MOLECULAR_FUNCTION	5.31666e-05	7.81067e-07	41	615	3531	129159
OVER	GO:0004675	transmembrane receptor protein serine/threonine kinase activity	MOLECULAR_FUNCTION	0.00362227	9.45582e-05	40	739	3532	129035
OVER	GO:0019199	transmembrane receptor protein kinase activity	MOLECULAR_FUNCTION	0.00464823	0.000126593	40	750	3532	129024
OVER	GO:0015297	antiporter activity	MOLECULAR_FUNCTION	0.0087373	0.00025944	36	674	3536	129100
OVER	GO:0035251	UDP-glucosyltransferase activity	MOLECULAR_FUNCTION	0.00636089	0.000180425	35	635	3537	129139
OVER	GO:0019843	rRNA binding	MOLECULAR_FUNCTION	0.000443363	8.81816e-06	34	518	3538	129256
OVER	GO:0030170	pyridoxal phosphate binding	MOLECULAR_FUNCTION	3.7932e-05	5.31537e-07	33	430	3539	129344
OVER	GO:0070279	vitamin B6 binding	MOLECULAR_FUNCTION	3.7932e-05	5.31537e-07	33	430	3539	129344
OVER	GO:0008514	organic anion transmembrane transporter activity	MOLECULAR_FUNCTION	0.000318646	5.86951e-06	31	440	3541	129334
OVER	GO:0016875	ligase activity, forming carbon-oxygen bonds	MOLECULAR_FUNCTION	0.000171455	2.86759e-06	30	402	3542	129372
OVER	GO:0004812	aminoacyl-tRNA ligase activity	MOLECULAR_FUNCTION	0.000171455	2.86759e-06	30	402	3542	129372
OVER	GO:0016831	carboxy-lyase activity	MOLECULAR_FUNCTION	0.000107755	1.7048e-06	29	370	3543	129404
OVER	GO:0016836	hydro-lyase activity	MOLECULAR_FUNCTION	0.00213942	5.05421e-05	29	449	3543	129325
OVER	GO:0005507	copper ion binding	MOLECULAR_FUNCTION	0.00234952	5.76163e-05	25	361	3547	129413
OVER	GO:0008483	transaminase activity	MOLECULAR_FUNCTION	0.000253269	4.55077e-06	22	247	3550	129527
OVER	GO:0016769	transferase activity, transferring nitrogenous groups	MOLECULAR_FUNCTION	0.000253269	4.55077e-06	22	247	3550	129527
OVER	GO:1901505	carbohydrate derivative transmembrane transporter activity	MOLECULAR_FUNCTION	0.00127077	2.77161e-05	22	280	3550	129494
OVER	GO:0016627	oxidoreductase activity, acting on the CH-CH group of donors	MOLECULAR_FUNCTION	0.00234289	5.71888e-05	22	295	3550	129479
OVER	GO:0016860	intramolecular oxidoreductase activity	MOLECULAR_FUNCTION	0.00363257	9.52375e-05	19	242	3553	129532
OVER	GO:0016628	oxidoreductase activity, acting on the CH-CH group of donors, NAD or NADP as acceptor	MOLECULAR_FUNCTION	0.00157587	3.45483e-05	15	147	3557	129627
OVER	GO:0004322	ferroxidase activity	MOLECULAR_FUNCTION	0.00337321	8.72941e-05	14	142	3558	129632
OVER	GO:0016722	oxidoreductase activity, oxidizing metal ions	MOLECULAR_FUNCTION	0.00337321	8.72941e-05	14	142	3558	129632
OVER	GO:0016724	oxidoreductase activity, oxidizing metal ions, oxygen as acceptor	MOLECULAR_FUNCTION	0.00337321	8.72941e-05	14	142	3558	129632
OVER	GO:0033293	monocarboxylic acid binding	MOLECULAR_FUNCTION	0.00503469	0.000139394	14	149	3558	129625
OVER	GO:0005200	structural constituent of cytoskeleton	MOLECULAR_FUNCTION	0.000383395	7.49506e-06	12	81	3560	129693
OVER	GO:0016884	carbon-nitrogen ligase activity, with glutamine as amido-N-donor	MOLECULAR_FUNCTION	0.00244637	6.02676e-05	11	86	3561	129688
OVER	GO:0051117	ATPase binding	MOLECULAR_FUNCTION	0.00391392	0.000104825	9	61	3563	129713
OVER	GO:0005504	fatty acid binding	MOLECULAR_FUNCTION	0.00896716	0.000267525	9	70	3563	129704
OVER	GO:0090447	glycerol-3-phosphate 2-O-acyltransferase activity	MOLECULAR_FUNCTION	0.00438295	0.000118873	8	48	3564	129726
OVER	GO:0005347	ATP transmembrane transporter activity	MOLECULAR_FUNCTION	0.0097944	0.000306326	6	29	3566	129745

## Sheet: 4H_SC_vs_SI_up
Tags	GO ID	GO Name	GO Category	FDR	P-Value	Nr test	Nr Reference	Non Annotated Test	Non Annotated Ref
OVER	GO:0009987	cellular process	BIOLOGICAL_PROCESS	1.5135e-21	6.84143e-25	1529	61906	1135	68776
OVER	GO:0008152	metabolic process	BIOLOGICAL_PROCESS	5.20129e-16	8.22897e-19	1415	58185	1249	72497
OVER	GO:0071704	organic substance metabolic process	BIOLOGICAL_PROCESS	4.91111e-13	1.38748e-15	1187	48332	1477	82350
OVER	GO:0044237	cellular metabolic process	BIOLOGICAL_PROCESS	3.30591e-08	1.60644e-10	1122	47208	1542	83474
OVER	GO:0044238	primary metabolic process	BIOLOGICAL_PROCESS	4.5924e-10	1.66072e-12	1105	45584	1559	85098
OVER	GO:0006807	nitrogen compound metabolic process	BIOLOGICAL_PROCESS	0.000727193	9.03958e-06	927	40330	1737	90352
OVER	GO:0044260	cellular macromolecule metabolic process	BIOLOGICAL_PROCESS	0.00119696	1.66376e-05	721	30770	1943	99912
OVER	GO:1901564	organonitrogen compound metabolic process	BIOLOGICAL_PROCESS	1.17749e-07	6.51622e-10	682	26980	1982	103702
OVER	GO:0009058	biosynthetic process	BIOLOGICAL_PROCESS	1.23475e-14	2.93025e-17	563	19570	2101	111112
OVER	GO:1901576	organic substance biosynthetic process	BIOLOGICAL_PROCESS	1.51616e-14	3.76941e-17	548	18958	2116	111724
OVER	GO:0044249	cellular biosynthetic process	BIOLOGICAL_PROCESS	6.00798e-14	1.62947e-16	531	18386	2133	112296
OVER	GO:0034641	cellular nitrogen compound metabolic process	BIOLOGICAL_PROCESS	0.00153963	2.22706e-05	519	21478	2145	109204
OVER	GO:0044267	cellular protein metabolic process	BIOLOGICAL_PROCESS	0.00982448	0.00022229	473	19886	2191	110796
OVER	GO:0009059	macromolecule biosynthetic process	BIOLOGICAL_PROCESS	5.91724e-09	2.34594e-11	389	13640	2275	117042
OVER	GO:0034645	cellular macromolecule biosynthetic process	BIOLOGICAL_PROCESS	1.12396e-07	5.96971e-10	375	13417	2289	117265
OVER	GO:0050896	response to stimulus	BIOLOGICAL_PROCESS	6.37611e-05	6.12464e-07	363	13820	2301	116862
OVER	GO:0044271	cellular nitrogen compound biosynthetic process	BIOLOGICAL_PROCESS	1.56363e-05	1.3606e-07	361	13514	2303	117168
OVER	GO:0006793	phosphorus metabolic process	BIOLOGICAL_PROCESS	0.00483708	9.40194e-05	347	13962	2317	116720
OVER	GO:0051179	localization	BIOLOGICAL_PROCESS	0.00103623	1.3935e-05	310	11978	2354	118704
OVER	GO:0051234	establishment of localization	BIOLOGICAL_PROCESS	0.00262209	4.3412e-05	296	11548	2368	119134
OVER	GO:0006810	transport	BIOLOGICAL_PROCESS	0.00421628	7.76645e-05	290	11382	2374	119300
OVER	GO:0071840	cellular component organization or biogenesis	BIOLOGICAL_PROCESS	8.89592e-06	7.43924e-08	289	10341	2375	120341
OVER	GO:1901566	organonitrogen compound biosynthetic process	BIOLOGICAL_PROCESS	8.07132e-20	6.38482e-23	264	6723	2400	123959
OVER	GO:0055114	oxidation-reduction process	BIOLOGICAL_PROCESS	3.43543e-05	3.26111e-07	263	9419	2401	121263
OVER	GO:0016043	cellular component organization	BIOLOGICAL_PROCESS	0.000332161	3.75366e-06	249	9134	2415	121548
OVER	GO:0044281	small molecule metabolic process	BIOLOGICAL_PROCESS	3.75762e-15	7.63584e-18	237	6385	2427	124297
OVER	GO:0006950	response to stress	BIOLOGICAL_PROCESS	0.00336051	5.92427e-05	205	7623	2459	123059
OVER	GO:0006468	protein phosphorylation	BIOLOGICAL_PROCESS	0.0074225	0.000156016	205	7764	2459	122918
OVER	GO:0043603	cellular amide metabolic process	BIOLOGICAL_PROCESS	4.76089e-21	2.69007e-24	202	4456	2462	126226
OVER	GO:0006518	peptide metabolic process	BIOLOGICAL_PROCESS	1.62946e-20	1.10484e-23	182	3863	2482	126819
OVER	GO:0042221	response to chemical	BIOLOGICAL_PROCESS	0.00021767	2.31224e-06	173	5883	2491	124799
OVER	GO:0043604	amide biosynthetic process	BIOLOGICAL_PROCESS	8.71485e-18	8.86356e-21	171	3765	2493	126917
OVER	GO:0043436	oxoacid metabolic process	BIOLOGICAL_PROCESS	2.06281e-15	3.72979e-18	169	3952	2495	126730
OVER	GO:0006082	organic acid metabolic process	BIOLOGICAL_PROCESS	3.75762e-15	7.64349e-18	169	3984	2495	126698
OVER	GO:0019752	carboxylic acid metabolic process	BIOLOGICAL_PROCESS	1.10007e-15	1.86474e-18	168	3888	2496	126794
OVER	GO:0005975	carbohydrate metabolic process	BIOLOGICAL_PROCESS	5.17446e-11	1.57883e-13	168	4448	2496	126234
OVER	GO:0043043	peptide biosynthetic process	BIOLOGICAL_PROCESS	5.30907e-17	6.59959e-20	158	3422	2506	127260
OVER	GO:0006412	translation	BIOLOGICAL_PROCESS	5.0478e-17	5.70438e-20	156	3352	2508	127330
OVER	GO:0044085	cellular component biogenesis	BIOLOGICAL_PROCESS	2.69516e-06	1.9188e-08	153	4654	2511	126028
OVER	GO:0006811	ion transport	BIOLOGICAL_PROCESS	0.00156361	2.3501e-05	127	4241	2537	126441
OVER	GO:0044283	small molecule biosynthetic process	BIOLOGICAL_PROCESS	2.93579e-12	8.62591e-15	116	2526	2548	128156
OVER	GO:0016053	organic acid biosynthetic process	BIOLOGICAL_PROCESS	4.35029e-15	9.83227e-18	101	1835	2563	128847
OVER	GO:0046394	carboxylic acid biosynthetic process	BIOLOGICAL_PROCESS	4.35029e-15	9.83227e-18	101	1835	2563	128847
OVER	GO:0070887	cellular response to chemical stimulus	BIOLOGICAL_PROCESS	0.00220559	3.56424e-05	101	3236	2563	127446
OVER	GO:0022607	cellular component assembly	BIOLOGICAL_PROCESS	0.00819694	0.000175967	91	2982	2573	127700
OVER	GO:0006520	cellular amino acid metabolic process	BIOLOGICAL_PROCESS	3.70446e-10	1.29776e-12	89	1856	2575	128826
OVER	GO:0006952	defense response	BIOLOGICAL_PROCESS	0.000260007	2.82073e-06	85	2425	2579	128257
OVER	GO:0022613	ribonucleoprotein complex biogenesis	BIOLOGICAL_PROCESS	5.91724e-09	2.40728e-11	80	1680	2584	129002
OVER	GO:0032787	monocarboxylic acid metabolic process	BIOLOGICAL_PROCESS	5.90005e-07	3.80046e-09	79	1853	2585	128829
OVER	GO:0065003	protein-containing complex assembly	BIOLOGICAL_PROCESS	0.00172195	2.64646e-05	74	2165	2590	128517
OVER	GO:0044262	cellular carbohydrate metabolic process	BIOLOGICAL_PROCESS	8.99231e-06	7.62146e-08	72	1755	2592	128927
OVER	GO:0042254	ribosome biogenesis	BIOLOGICAL_PROCESS	6.74864e-10	2.51673e-12	71	1329	2593	129353
OVER	GO:0071554	cell wall organization or biogenesis	BIOLOGICAL_PROCESS	5.72693e-06	4.33613e-08	69	1627	2595	129055
OVER	GO:0034622	cellular protein-containing complex assembly	BIOLOGICAL_PROCESS	0.000842837	1.07629e-05	69	1919	2595	128763
OVER	GO:0005976	polysaccharide metabolic process	BIOLOGICAL_PROCESS	9.47929e-05	9.31967e-07	63	1568	2601	129114
OVER	GO:1901605	alpha-amino acid metabolic process	BIOLOGICAL_PROCESS	3.13394e-08	1.48746e-10	59	1100	2605	129582
OVER	GO:0045229	external encapsulating structure organization	BIOLOGICAL_PROCESS	7.11491e-06	5.46744e-08	56	1210	2608	129472
OVER	GO:0071555	cell wall organization	BIOLOGICAL_PROCESS	2.99078e-06	2.19687e-08	54	1113	2610	129569
OVER	GO:0044264	cellular polysaccharide metabolic process	BIOLOGICAL_PROCESS	2.74143e-05	2.57135e-07	54	1207	2610	129475
OVER	GO:0072330	monocarboxylic acid biosynthetic process	BIOLOGICAL_PROCESS	3.64979e-07	2.22724e-09	51	947	2613	129735
OVER	GO:0008652	cellular amino acid biosynthetic process	BIOLOGICAL_PROCESS	5.91724e-09	2.40091e-11	47	717	2617	129965
OVER	GO:0006820	anion transport	BIOLOGICAL_PROCESS	0.00371604	6.67702e-05	47	1230	2617	129452
OVER	GO:0016052	carbohydrate catabolic process	BIOLOGICAL_PROCESS	0.00171657	2.60448e-05	44	1077	2620	129605
OVER	GO:0006790	sulfur compound metabolic process	BIOLOGICAL_PROCESS	0.00449679	8.53723e-05	44	1137	2620	129545
OVER	GO:0016051	carbohydrate biosynthetic process	BIOLOGICAL_PROCESS	0.00483708	9.37412e-05	44	1142	2620	129540
OVER	GO:0000278	mitotic cell cycle	BIOLOGICAL_PROCESS	0.000849956	1.09498e-05	41	937	2623	129745
OVER	GO:0022618	ribonucleoprotein complex assembly	BIOLOGICAL_PROCESS	2.18368e-07	1.28321e-09	40	624	2624	130058
OVER	GO:0071826	ribonucleoprotein complex subunit organization	BIOLOGICAL_PROCESS	4.76891e-07	2.96406e-09	40	644	2624	130038
OVER	GO:1901607	alpha-amino acid biosynthetic process	BIOLOGICAL_PROCESS	1.20726e-06	8.18576e-09	39	642	2625	130040
OVER	GO:0007017	microtubule-based process	BIOLOGICAL_PROCESS	0.000476856	5.76602e-06	39	846	2625	129836
OVER	GO:0042273	ribosomal large subunit biogenesis	BIOLOGICAL_PROCESS	5.86136e-14	1.52346e-16	38	323	2626	130359
OVER	GO:0044042	glucan metabolic process	BIOLOGICAL_PROCESS	0.00433572	8.13346e-05	38	926	2626	129756
OVER	GO:0006073	cellular glucan metabolic process	BIOLOGICAL_PROCESS	0.00433572	8.13346e-05	38	926	2626	129756
OVER	GO:0070925	organelle assembly	BIOLOGICAL_PROCESS	2.99078e-06	2.18613e-08	37	612	2627	130070
OVER	GO:0044282	small molecule catabolic process	BIOLOGICAL_PROCESS	0.00262209	4.38163e-05	37	864	2627	129818
OVER	GO:0006364	rRNA processing	BIOLOGICAL_PROCESS	0.00296928	5.1339e-05	37	871	2627	129811
OVER	GO:0016072	rRNA metabolic process	BIOLOGICAL_PROCESS	0.0057717	0.000116751	37	909	2627	129773
OVER	GO:0051301	cell division	BIOLOGICAL_PROCESS	0.000927018	1.22569e-05	36	779	2628	129903
OVER	GO:0006631	fatty acid metabolic process	BIOLOGICAL_PROCESS	0.00101953	1.35953e-05	36	783	2628	129899
OVER	GO:0034637	cellular carbohydrate biosynthetic process	BIOLOGICAL_PROCESS	0.00471912	9.066e-05	36	863	2628	129819
OVER	GO:0015711	organic anion transport	BIOLOGICAL_PROCESS	0.00136002	1.90578e-05	35	764	2629	129918
OVER	GO:0000271	polysaccharide biosynthetic process	BIOLOGICAL_PROCESS	0.00216365	3.47201e-05	35	788	2629	129894
OVER	GO:1903047	mitotic cell cycle process	BIOLOGICAL_PROCESS	0.00709391	0.000148308	33	784	2631	129898
OVER	GO:0042255	ribosome assembly	BIOLOGICAL_PROCESS	1.47081e-10	4.98637e-13	31	283	2633	130399
OVER	GO:0033692	cellular polysaccharide biosynthetic process	BIOLOGICAL_PROCESS	0.00637049	0.000131744	31	712	2633	129970
OVER	GO:0006633	fatty acid biosynthetic process	BIOLOGICAL_PROCESS	0.00116956	1.59924e-05	29	570	2635	130112
OVER	GO:0002181	cytoplasmic translation	BIOLOGICAL_PROCESS	4.79025e-08	2.436e-10	28	303	2636	130379
OVER	GO:0006575	cellular modified amino acid metabolic process	BIOLOGICAL_PROCESS	0.00089083	1.16777e-05	28	530	2636	130152
OVER	GO:0009408	response to heat	BIOLOGICAL_PROCESS	0.00610358	0.000125534	27	580	2637	130102
OVER	GO:0051273	beta-glucan metabolic process	BIOLOGICAL_PROCESS	9.56969e-05	9.5167e-07	25	380	2639	130302
OVER	GO:0009064	glutamine family amino acid metabolic process	BIOLOGICAL_PROCESS	1.68833e-05	1.48819e-07	24	317	2640	130365
OVER	GO:0009072	aromatic amino acid family metabolic process	BIOLOGICAL_PROCESS	0.000463327	5.55008e-06	22	341	2642	130341
OVER	GO:0009698	phenylpropanoid metabolic process	BIOLOGICAL_PROCESS	0.003846	6.99747e-05	22	407	2642	130275
OVER	GO:0006749	glutathione metabolic process	BIOLOGICAL_PROCESS	0.00262209	4.39061e-05	21	365	2643	130317
OVER	GO:0000027	ribosomal large subunit assembly	BIOLOGICAL_PROCESS	3.38368e-08	1.68247e-10	20	145	2644	130537
OVER	GO:0030243	cellulose metabolic process	BIOLOGICAL_PROCESS	0.000842837	1.06161e-05	20	303	2644	130379
OVER	GO:0006928	movement of cell or subcellular component	BIOLOGICAL_PROCESS	0.00148307	2.12849e-05	20	319	2644	130363
OVER	GO:0007018	microtubule-based movement	BIOLOGICAL_PROCESS	0.00275859	4.70727e-05	18	284	2646	130398
OVER	GO:0009063	cellular amino acid catabolic process	BIOLOGICAL_PROCESS	0.00982448	0.000223158	18	324	2646	130358
OVER	GO:0006414	translational elongation	BIOLOGICAL_PROCESS	0.0037909	6.85438e-05	17	266	2647	130416
OVER	GO:0042274	ribosomal small subunit biogenesis	BIOLOGICAL_PROCESS	0.00463441	8.8509e-05	17	272	2647	130410
OVER	GO:0051274	beta-glucan biosynthetic process	BIOLOGICAL_PROCESS	0.00547427	0.000108879	17	277	2647	130405
OVER	GO:1901606	alpha-amino acid catabolic process	BIOLOGICAL_PROCESS	0.00601249	0.000122981	17	280	2647	130402
OVER	GO:0009073	aromatic amino acid family biosynthetic process	BIOLOGICAL_PROCESS	0.000386598	4.54359e-06	16	189	2648	130493
OVER	GO:0000470	maturation of LSU-rRNA	BIOLOGICAL_PROCESS	0.00021882	2.34918e-06	13	117	2651	130565
OVER	GO:0000281	mitotic cytokinesis	BIOLOGICAL_PROCESS	0.00327884	5.74324e-05	12	139	2652	130543
OVER	GO:0061640	cytoskeleton-dependent cytokinesis	BIOLOGICAL_PROCESS	0.00563878	0.000112788	12	150	2652	130532
OVER	GO:0000028	ribosomal small subunit assembly	BIOLOGICAL_PROCESS	0.00197121	3.14093e-05	11	109	2653	130573
OVER	GO:0006270	DNA replication initiation	BIOLOGICAL_PROCESS	0.00417045	7.63491e-05	10	100	2654	130582
OVER	GO:0009084	glutamine family amino acid biosynthetic process	BIOLOGICAL_PROCESS	0.00981284	0.000220675	10	115	2654	130567
OVER	GO:0006525	arginine metabolic process	BIOLOGICAL_PROCESS	0.00187759	2.92809e-05	9	70	2655	130612
OVER	GO:0046219	indolalkylamine biosynthetic process	BIOLOGICAL_PROCESS	0.00801877	0.000170361	8	70	2656	130612
OVER	GO:0000162	tryptophan biosynthetic process	BIOLOGICAL_PROCESS	0.00801877	0.000170361	8	70	2656	130612
OVER	GO:0110165	cellular anatomical entity	CELLULAR_COMPONENT	1.22074e-16	1.79338e-19	1551	64638	1113	66044
OVER	GO:0016020	membrane	CELLULAR_COMPONENT	8.02391e-06	6.28521e-08	983	41814	1681	88868
OVER	GO:0031224	intrinsic component of membrane	CELLULAR_COMPONENT	2.84964e-08	1.32032e-10	825	33254	1839	97428
OVER	GO:0016021	integral component of membrane	CELLULAR_COMPONENT	9.38633e-07	6.15219e-09	802	32871	1862	97811
OVER	GO:0071944	cell periphery	CELLULAR_COMPONENT	5.26667e-18	4.76137e-21	334	9554	2330	121128
OVER	GO:0005886	plasma membrane	CELLULAR_COMPONENT	1.22074e-16	1.74138e-19	297	8384	2367	122298
OVER	GO:0043228	non-membrane-bounded organelle	CELLULAR_COMPONENT	5.56168e-11	1.82268e-13	205	5818	2459	124864
OVER	GO:0043232	intracellular non-membrane-bounded organelle	CELLULAR_COMPONENT	5.56168e-11	1.82268e-13	205	5818	2459	124864
OVER	GO:0098588	bounding membrane of organelle	CELLULAR_COMPONENT	1.70997e-05	1.52659e-07	100	2792	2564	127890
OVER	GO:0005576	extracellular region	CELLULAR_COMPONENT	0.00182271	2.82191e-05	85	2590	2579	128092
OVER	GO:0005794	Golgi apparatus	CELLULAR_COMPONENT	4.99894e-07	3.16353e-09	76	1745	2588	128937
OVER	GO:0005694	chromosome	CELLULAR_COMPONENT	0.000727068	8.95587e-06	75	2129	2589	128553
OVER	GO:0031226	intrinsic component of plasma membrane	CELLULAR_COMPONENT	1.246e-06	8.58921e-09	68	1524	2596	129158
OVER	GO:0000139	Golgi membrane	CELLULAR_COMPONENT	6.68589e-08	3.47554e-10	57	1067	2607	129615
OVER	GO:0070161	anchoring junction	CELLULAR_COMPONENT	0.00156361	2.34829e-05	53	1386	2611	129296
OVER	GO:0009506	plasmodesma	CELLULAR_COMPONENT	0.00156361	2.34829e-05	53	1386	2611	129296
OVER	GO:0005911	cell-cell junction	CELLULAR_COMPONENT	0.00156361	2.34829e-05	53	1386	2611	129296
OVER	GO:0055044	symplast	CELLULAR_COMPONENT	0.00156361	2.34829e-05	53	1386	2611	129296
OVER	GO:0030054	cell junction	CELLULAR_COMPONENT	0.00171657	2.6188e-05	53	1392	2611	129290
OVER	GO:0005856	cytoskeleton	CELLULAR_COMPONENT	0.000103486	1.04082e-06	51	1167	2613	129515
OVER	GO:0005730	nucleolus	CELLULAR_COMPONENT	0.000288599	3.19615e-06	48	1116	2616	129566
OVER	GO:0000785	chromatin	CELLULAR_COMPONENT	0.000422167	5.00933e-06	48	1136	2616	129546
OVER	GO:0032993	protein-DNA complex	CELLULAR_COMPONENT	1.17749e-07	6.52018e-10	46	770	2618	129912
OVER	GO:0044815	DNA packaging complex	CELLULAR_COMPONENT	1.25738e-08	5.39955e-11	44	657	2620	130025
OVER	GO:0000786	nucleosome	CELLULAR_COMPONENT	1.21784e-08	5.0921e-11	43	630	2621	130052
OVER	GO:0099080	supramolecular complex	CELLULAR_COMPONENT	0.000372192	4.33222e-06	43	964	2621	129718
OVER	GO:0031225	anchored component of membrane	CELLULAR_COMPONENT	3.15076e-07	1.88711e-09	41	660	2623	130022
OVER	GO:0015630	microtubule cytoskeleton	CELLULAR_COMPONENT	2.31825e-05	2.12203e-07	41	792	2623	129890
OVER	GO:0046658	anchored component of plasma membrane	CELLULAR_COMPONENT	1.13388e-06	7.56005e-09	39	640	2625	130042
OVER	GO:0005618	cell wall	CELLULAR_COMPONENT	0.00145347	2.06959e-05	39	898	2625	129784
OVER	GO:0030312	external encapsulating structure	CELLULAR_COMPONENT	0.00188931	2.98907e-05	39	914	2625	129768
OVER	GO:0099081	supramolecular polymer	CELLULAR_COMPONENT	8.02391e-06	6.6034e-08	37	641	2627	130041
OVER	GO:0099512	supramolecular fiber	CELLULAR_COMPONENT	8.02391e-06	6.6034e-08	37	641	2627	130041
OVER	GO:0099513	polymeric cytoskeletal fiber	CELLULAR_COMPONENT	8.02391e-06	6.6034e-08	37	641	2627	130041
OVER	GO:0005874	microtubule	CELLULAR_COMPONENT	8.02391e-06	6.61934e-08	36	613	2628	130069
OVER	GO:0030659	cytoplasmic vesicle membrane	CELLULAR_COMPONENT	0.00574417	0.000115546	24	483	2640	130199
OVER	GO:0012506	vesicle membrane	CELLULAR_COMPONENT	0.0082588	0.000178261	24	498	2640	130184
OVER	GO:0098687	chromosomal region	CELLULAR_COMPONENT	0.0096554	0.000216043	21	412	2643	130270
OVER	GO:0005875	microtubule associated complex	CELLULAR_COMPONENT	0.00601249	0.000122333	19	336	2645	130346
OVER	GO:0005871	kinesin complex	CELLULAR_COMPONENT	0.000852848	1.10835e-05	17	228	2647	130454
OVER	GO:0010369	chromocenter	CELLULAR_COMPONENT	2.74143e-05	2.56255e-07	12	78	2652	130604
OVER	GO:0042788	polysomal ribosome	CELLULAR_COMPONENT	0.00963868	0.000212402	5	23	2659	130659
OVER	GO:0003824	catalytic activity	MOLECULAR_FUNCTION	1.3569e-23	4.6002e-27	1341	52198	1323	78484
OVER	GO:0005488	binding	MOLECULAR_FUNCTION	2.81693e-08	1.27333e-10	1279	54693	1385	75989
OVER	GO:0097159	organic cyclic compound binding	MOLECULAR_FUNCTION	0.000131766	1.34014e-06	908	38957	1756	91725
OVER	GO:1901363	heterocyclic compound binding	MOLECULAR_FUNCTION	0.000154882	1.61026e-06	906	38906	1758	91776
OVER	GO:0043167	ion binding	MOLECULAR_FUNCTION	1.96365e-07	1.13172e-09	799	32426	1865	98256
OVER	GO:0016740	transferase activity	MOLECULAR_FUNCTION	6.63953e-05	6.4527e-07	569	23049	2095	107633
OVER	GO:0036094	small molecule binding	MOLECULAR_FUNCTION	0.000182439	1.91737e-06	508	20484	2156	110198
OVER	GO:0043168	anion binding	MOLECULAR_FUNCTION	0.000143261	1.47325e-06	495	19847	2169	110835
OVER	GO:1901265	nucleoside phosphate binding	MOLECULAR_FUNCTION	0.00262209	4.44473e-05	475	19613	2189	111069
OVER	GO:0000166	nucleotide binding	MOLECULAR_FUNCTION	0.00262209	4.44473e-05	475	19613	2189	111069
OVER	GO:0016787	hydrolase activity	MOLECULAR_FUNCTION	0.000335277	3.82676e-06	439	17498	2225	113184
OVER	GO:0097367	carbohydrate derivative binding	MOLECULAR_FUNCTION	0.00281649	4.8379e-05	436	17853	2228	112829
OVER	GO:0032553	ribonucleotide binding	MOLECULAR_FUNCTION	0.00355592	6.30896e-05	431	17681	2233	113001
OVER	GO:0017076	purine nucleotide binding	MOLECULAR_FUNCTION	0.0051081	0.000100179	425	17506	2239	113176
OVER	GO:0032555	purine ribonucleotide binding	MOLECULAR_FUNCTION	0.0051081	0.000100442	424	17461	2240	113221
OVER	GO:0035639	purine ribonucleoside triphosphate binding	MOLECULAR_FUNCTION	1.84495e-08	8.13119e-11	404	14418	2260	116264
OVER	GO:0005524	ATP binding	MOLECULAR_FUNCTION	1.75389e-07	9.9101e-10	371	13307	2293	117375
OVER	GO:0043169	cation binding	MOLECULAR_FUNCTION	0.0096554	0.00021566	362	14806	2302	115876
OVER	GO:0016491	oxidoreductase activity	MOLECULAR_FUNCTION	0.000320717	3.58808e-06	249	9128	2415	121554
OVER	GO:0005515	protein binding	MOLECULAR_FUNCTION	0.00422207	7.82483e-05	249	9576	2415	121106
OVER	GO:0005198	structural molecule activity	MOLECULAR_FUNCTION	1.67502e-29	1.89289e-33	137	1937	2527	128745
OVER	GO:0003735	structural constituent of ribosome	MOLECULAR_FUNCTION	3.16077e-26	7.14378e-30	116	1577	2548	129105
OVER	GO:0016757	transferase activity, transferring glycosyl groups	MOLECULAR_FUNCTION	0.000724824	8.84631e-06	112	3550	2552	127132
OVER	GO:0016798	hydrolase activity, acting on glycosyl bonds	MOLECULAR_FUNCTION	4.3788e-06	3.26591e-08	93	2446	2571	128236
OVER	GO:0022804	active transmembrane transporter activity	MOLECULAR_FUNCTION	2.21835e-05	2.00552e-07	93	2552	2571	128130
OVER	GO:0004553	hydrolase activity, hydrolyzing O-glycosyl compounds	MOLECULAR_FUNCTION	1.06717e-05	9.16545e-08	82	2112	2582	128570
OVER	GO:0046983	protein dimerization activity	MOLECULAR_FUNCTION	0.00116966	1.6126e-05	82	2433	2582	128249
OVER	GO:0016829	lyase activity	MOLECULAR_FUNCTION	0.00366592	6.54554e-05	71	2116	2593	128566
OVER	GO:0015291	secondary active transmembrane transporter activity	MOLECULAR_FUNCTION	0.000842837	1.0694e-05	57	1485	2607	129197
OVER	GO:0016614	oxidoreductase activity, acting on CH-OH group of donors	MOLECULAR_FUNCTION	0.00108291	1.46852e-05	45	1084	2619	129598
OVER	GO:0046982	protein heterodimerization activity	MOLECULAR_FUNCTION	2.41371e-06	1.69115e-08	44	803	2620	129879
OVER	GO:0016616	oxidoreductase activity, acting on the CH-OH group of donors, NAD or NADP as acceptor	MOLECULAR_FUNCTION	0.00440152	8.30664e-05	38	927	2626	129755
OVER	GO:0008017	microtubule binding	MOLECULAR_FUNCTION	0.000266939	2.9261e-06	32	606	2632	130076
OVER	GO:0015631	tubulin binding	MOLECULAR_FUNCTION	0.00143941	2.03329e-05	32	671	2632	130011
OVER	GO:0019199	transmembrane receptor protein kinase activity	MOLECULAR_FUNCTION	0.00819694	0.000175999	32	758	2632	129924
OVER	GO:0015297	antiporter activity	MOLECULAR_FUNCTION	0.00648562	0.000134858	30	680	2634	130002
OVER	GO:0016830	carbon-carbon lyase activity	MOLECULAR_FUNCTION	0.00326478	5.68172e-05	29	614	2635	130068
OVER	GO:0008514	organic anion transmembrane transporter activity	MOLECULAR_FUNCTION	0.00227315	3.72479e-05	24	447	2640	130235
OVER	GO:0004364	glutathione transferase activity	MOLECULAR_FUNCTION	0.00036955	4.2597e-06	22	335	2642	130347
OVER	GO:0003774	motor activity	MOLECULAR_FUNCTION	0.0096554	0.000216043	21	412	2643	130270
OVER	GO:0008422	beta-glucosidase activity	MOLECULAR_FUNCTION	0.00222318	3.61778e-05	20	332	2644	130350
OVER	GO:0003777	microtubule motor activity	MOLECULAR_FUNCTION	0.00188931	2.96949e-05	19	300	2645	130382
OVER	GO:0005342	organic acid transmembrane transporter activity	MOLECULAR_FUNCTION	0.0088231	0.000193432	18	320	2646	130362
OVER	GO:0046943	carboxylic acid transmembrane transporter activity	MOLECULAR_FUNCTION	0.0088231	0.000193432	18	320	2646	130362
OVER	GO:0005200	structural constituent of cytoskeleton	MOLECULAR_FUNCTION	0.00539269	0.000106647	9	84	2655	130598
OVER	GO:0042973	glucan endo-1,3-beta-D-glucosidase activity	MOLECULAR_FUNCTION	0.00858435	0.000186258	8	71	2656	130611

## Sheet: 1H_RC_vs_RI_up
Tags	GO ID	GO Name	GO Category	FDR	P-Value	Nr test	Nr Reference	Non Annotated Test	Non Annotated Ref
OVER	GO:0009987	cellular process	BIOLOGICAL_PROCESS	2.72922e-11	1.01779e-13	770	62665	567	69344
OVER	GO:0008152	metabolic process	BIOLOGICAL_PROCESS	1.48357e-15	1.67653e-18	756	58844	581	73165
OVER	GO:0071704	organic substance metabolic process	BIOLOGICAL_PROCESS	1.86617e-05	2.00346e-07	587	48932	750	83077
OVER	GO:0044237	cellular metabolic process	BIOLOGICAL_PROCESS	1.78312e-06	1.57174e-08	583	47747	754	84262
OVER	GO:1901564	organonitrogen compound metabolic process	BIOLOGICAL_PROCESS	3.95776e-09	2.01265e-11	379	27283	958	104726
OVER	GO:0006793	phosphorus metabolic process	BIOLOGICAL_PROCESS	2.24491e-10	9.64026e-13	229	14080	1108	117929
OVER	GO:0006796	phosphate-containing compound metabolic process	BIOLOGICAL_PROCESS	1.85921e-10	7.77383e-13	228	13969	1109	118040
OVER	GO:0050896	response to stimulus	BIOLOGICAL_PROCESS	1.41241e-06	1.16517e-08	209	13974	1128	118035
OVER	GO:0016310	phosphorylation	BIOLOGICAL_PROCESS	4.37986e-12	1.43537e-14	194	10804	1143	121205
OVER	GO:0006464	cellular protein modification process	BIOLOGICAL_PROCESS	0.0033887	7.08453e-05	191	14342	1146	117667
OVER	GO:0036211	protein modification process	BIOLOGICAL_PROCESS	0.0033887	7.08453e-05	191	14342	1146	117667
OVER	GO:0055114	oxidation-reduction process	BIOLOGICAL_PROCESS	1.79373e-12	5.67571e-15	178	9504	1159	122505
OVER	GO:0051179	localization	BIOLOGICAL_PROCESS	4.37626e-05	5.14331e-07	178	12110	1159	119899
OVER	GO:0051234	establishment of localization	BIOLOGICAL_PROCESS	1.75459e-05	1.86385e-07	175	11669	1162	120340
OVER	GO:0006810	transport	BIOLOGICAL_PROCESS	1.11268e-05	1.14424e-07	174	11498	1163	120511
OVER	GO:0006468	protein phosphorylation	BIOLOGICAL_PROCESS	7.74829e-13	2.18903e-15	156	7813	1181	124196
OVER	GO:0044281	small molecule metabolic process	BIOLOGICAL_PROCESS	6.22454e-18	2.11025e-21	153	6469	1184	125540
OVER	GO:0006950	response to stress	BIOLOGICAL_PROCESS	1.33837e-07	9.83094e-10	135	7693	1202	124316
OVER	GO:0055085	transmembrane transport	BIOLOGICAL_PROCESS	1.38595e-12	4.07216e-15	134	6333	1203	125676
OVER	GO:0009056	catabolic process	BIOLOGICAL_PROCESS	0.00195225	3.77257e-05	116	7808	1221	124201
OVER	GO:0006082	organic acid metabolic process	BIOLOGICAL_PROCESS	1.53544e-16	1.04109e-19	110	4043	1227	127966
OVER	GO:0043436	oxoacid metabolic process	BIOLOGICAL_PROCESS	1.88749e-16	1.7064e-19	109	4012	1228	127997
OVER	GO:0019752	carboxylic acid metabolic process	BIOLOGICAL_PROCESS	1.88749e-16	1.57113e-19	108	3948	1229	128061
OVER	GO:0042221	response to chemical	BIOLOGICAL_PROCESS	1.20151e-06	9.64034e-09	108	5948	1229	126061
OVER	GO:0006811	ion transport	BIOLOGICAL_PROCESS	8.70554e-09	4.52543e-11	92	4276	1245	127733
OVER	GO:0071702	organic substance transport	BIOLOGICAL_PROCESS	0.0045096	9.93754e-05	85	5465	1252	126544
OVER	GO:0044283	small molecule biosynthetic process	BIOLOGICAL_PROCESS	2.14211e-15	2.66281e-18	81	2561	1256	129448
OVER	GO:0005975	carbohydrate metabolic process	BIOLOGICAL_PROCESS	0.00139729	2.44751e-05	76	4540	1261	127469
OVER	GO:0006952	defense response	BIOLOGICAL_PROCESS	6.97928e-13	1.8929e-15	73	2437	1264	129572
OVER	GO:0034220	ion transmembrane transport	BIOLOGICAL_PROCESS	1.13778e-06	9.00044e-09	67	3045	1270	128964
OVER	GO:0016053	organic acid biosynthetic process	BIOLOGICAL_PROCESS	4.61569e-14	8.8673e-17	65	1871	1272	130138
OVER	GO:0046394	carboxylic acid biosynthetic process	BIOLOGICAL_PROCESS	4.61569e-14	8.8673e-17	65	1871	1272	130138
OVER	GO:0006520	cellular amino acid metabolic process	BIOLOGICAL_PROCESS	1.83091e-13	3.93122e-16	64	1881	1273	130128
OVER	GO:0006812	cation transport	BIOLOGICAL_PROCESS	6.74501e-05	8.41446e-07	58	2832	1279	129177
OVER	GO:0070887	cellular response to chemical stimulus	BIOLOGICAL_PROCESS	0.00266794	5.36663e-05	58	3279	1279	128730
OVER	GO:1901700	response to oxygen-containing compound	BIOLOGICAL_PROCESS	0.000136365	1.80732e-06	53	2559	1284	129450
OVER	GO:0009605	response to external stimulus	BIOLOGICAL_PROCESS	1.44975e-05	1.50725e-07	52	2284	1285	129725
OVER	GO:0009607	response to biotic stimulus	BIOLOGICAL_PROCESS	7.40347e-08	5.35452e-10	51	1850	1286	130159
OVER	GO:1901605	alpha-amino acid metabolic process	BIOLOGICAL_PROCESS	4.78831e-14	9.74004e-17	49	1110	1288	130899
OVER	GO:0044419	interspecies interaction between organisms	BIOLOGICAL_PROCESS	3.32757e-06	3.19633e-08	48	1920	1289	130089
OVER	GO:0043207	response to external biotic stimulus	BIOLOGICAL_PROCESS	1.60089e-06	1.39302e-08	46	1746	1291	130263
OVER	GO:0051707	response to other organism	BIOLOGICAL_PROCESS	1.60089e-06	1.39302e-08	46	1746	1291	130263
OVER	GO:0098655	cation transmembrane transport	BIOLOGICAL_PROCESS	0.000354945	5.13426e-06	46	2176	1291	129833
OVER	GO:0032787	monocarboxylic acid metabolic process	BIOLOGICAL_PROCESS	6.16785e-05	7.38831e-07	44	1888	1293	130121
OVER	GO:0098542	defense response to other organism	BIOLOGICAL_PROCESS	2.42875e-06	2.22317e-08	42	1537	1295	130472
OVER	GO:0098660	inorganic ion transmembrane transport	BIOLOGICAL_PROCESS	0.00946854	0.0002231	42	2269	1295	129740
OVER	GO:0006790	sulfur compound metabolic process	BIOLOGICAL_PROCESS	1.02441e-08	5.6725e-11	40	1141	1297	130868
OVER	GO:0098662	inorganic cation transmembrane transport	BIOLOGICAL_PROCESS	0.00667682	0.00015166	40	2083	1297	129926
OVER	GO:0008652	cellular amino acid biosynthetic process	BIOLOGICAL_PROCESS	1.361e-11	4.7679e-14	36	728	1301	131281
OVER	GO:0006820	anion transport	BIOLOGICAL_PROCESS	5.60349e-06	5.44581e-08	36	1241	1301	130768
OVER	GO:0015672	monovalent inorganic cation transport	BIOLOGICAL_PROCESS	0.00690063	0.000157524	32	1529	1305	130480
OVER	GO:1901607	alpha-amino acid biosynthetic process	BIOLOGICAL_PROCESS	1.32163e-09	6.42218e-12	31	650	1306	131359
OVER	GO:0015711	organic anion transport	BIOLOGICAL_PROCESS	5.04074e-08	3.28852e-10	31	768	1306	131241
OVER	GO:0044282	small molecule catabolic process	BIOLOGICAL_PROCESS	2.21346e-06	2.00109e-08	30	871	1307	131138
OVER	GO:0072330	monocarboxylic acid biosynthetic process	BIOLOGICAL_PROCESS	4.77437e-05	5.66515e-07	29	969	1308	131040
OVER	GO:1902600	proton transmembrane transport	BIOLOGICAL_PROCESS	0.00373058	7.96791e-05	28	1209	1309	130800
OVER	GO:0009636	response to toxic substance	BIOLOGICAL_PROCESS	0.00755254	0.000173259	28	1269	1309	130740
OVER	GO:0006575	cellular modified amino acid metabolic process	BIOLOGICAL_PROCESS	5.72878e-07	4.46701e-09	24	534	1313	131475
OVER	GO:0098656	anion transmembrane transport	BIOLOGICAL_PROCESS	6.6863e-05	8.16047e-07	24	717	1313	131292
OVER	GO:0006749	glutathione metabolic process	BIOLOGICAL_PROCESS	3.49678e-09	1.73871e-11	23	363	1314	131646
OVER	GO:0046942	carboxylic acid transport	BIOLOGICAL_PROCESS	5.17221e-08	3.56543e-10	23	427	1314	131582
OVER	GO:0015849	organic acid transport	BIOLOGICAL_PROCESS	5.17221e-08	3.56543e-10	23	427	1314	131582
OVER	GO:1903825	organic acid transmembrane transport	BIOLOGICAL_PROCESS	5.04074e-08	3.30391e-10	21	350	1316	131659
OVER	GO:1905039	carboxylic acid transmembrane transport	BIOLOGICAL_PROCESS	5.04074e-08	3.30391e-10	21	350	1316	131659
OVER	GO:0016054	organic acid catabolic process	BIOLOGICAL_PROCESS	6.74501e-05	8.46079e-07	21	567	1316	131442
OVER	GO:0046395	carboxylic acid catabolic process	BIOLOGICAL_PROCESS	6.74501e-05	8.46079e-07	21	567	1316	131442
OVER	GO:0006955	immune response	BIOLOGICAL_PROCESS	0.00018517	2.55292e-06	21	610	1316	131399
OVER	GO:0002376	immune system process	BIOLOGICAL_PROCESS	0.000521749	7.78289e-06	21	658	1316	131351
OVER	GO:0009617	response to bacterium	BIOLOGICAL_PROCESS	0.00143548	2.59551e-05	21	716	1316	131293
OVER	GO:0006865	amino acid transport	BIOLOGICAL_PROCESS	1.58059e-08	9.28813e-11	20	291	1317	131718
OVER	GO:0009072	aromatic amino acid family metabolic process	BIOLOGICAL_PROCESS	1.78863e-07	1.37447e-09	20	343	1317	131666
OVER	GO:0045087	innate immune response	BIOLOGICAL_PROCESS	0.000493034	7.24312e-06	20	602	1317	131407
OVER	GO:0003333	amino acid transmembrane transport	BIOLOGICAL_PROCESS	5.30056e-08	3.71381e-10	19	282	1318	131727
OVER	GO:0009308	amine metabolic process	BIOLOGICAL_PROCESS	3.00488e-05	3.46365e-07	19	443	1318	131566
OVER	GO:0042742	defense response to bacterium	BIOLOGICAL_PROCESS	0.0036193	7.64843e-05	19	659	1318	131350
OVER	GO:0009651	response to salt stress	BIOLOGICAL_PROCESS	0.00548797	0.000122795	18	627	1319	131382
OVER	GO:1901606	alpha-amino acid catabolic process	BIOLOGICAL_PROCESS	1.5568e-06	1.31948e-08	17	280	1320	131729
OVER	GO:0009063	cellular amino acid catabolic process	BIOLOGICAL_PROCESS	9.99174e-06	1.01622e-07	17	325	1320	131684
OVER	GO:0008643	carbohydrate transport	BIOLOGICAL_PROCESS	0.00233096	4.63611e-05	17	525	1320	131484
OVER	GO:0006576	cellular biogenic amine metabolic process	BIOLOGICAL_PROCESS	2.44278e-05	2.73291e-07	15	270	1322	131739
OVER	GO:0044106	cellular amine metabolic process	BIOLOGICAL_PROCESS	8.1638e-05	1.0425e-06	15	302	1322	131707
OVER	GO:0034219	carbohydrate transmembrane transport	BIOLOGICAL_PROCESS	0.00037284	5.43523e-06	15	348	1322	131661
OVER	GO:0009611	response to wounding	BIOLOGICAL_PROCESS	0.00269365	5.44879e-05	15	428	1322	131581
OVER	GO:0009064	glutamine family amino acid metabolic process	BIOLOGICAL_PROCESS	0.000761729	1.18791e-05	14	327	1323	131682
OVER	GO:0031347	regulation of defense response	BIOLOGICAL_PROCESS	0.00564067	0.00012685	14	411	1323	131598
OVER	GO:0009073	aromatic amino acid family biosynthetic process	BIOLOGICAL_PROCESS	1.88405e-05	2.04394e-07	13	192	1324	131817
OVER	GO:0042430	indole-containing compound metabolic process	BIOLOGICAL_PROCESS	2.08495e-05	2.28546e-07	13	194	1324	131815
OVER	GO:0006855	drug transmembrane transport	BIOLOGICAL_PROCESS	0.000136365	1.83382e-06	13	236	1324	131773
OVER	GO:0015893	drug transport	BIOLOGICAL_PROCESS	0.000136365	1.83382e-06	13	236	1324	131773
OVER	GO:0042493	response to drug	BIOLOGICAL_PROCESS	0.000146487	2.00305e-06	13	238	1324	131771
OVER	GO:0035672	oligopeptide transmembrane transport	BIOLOGICAL_PROCESS	0.000778731	1.23203e-05	13	284	1324	131725
OVER	GO:0042537	benzene-containing compound metabolic process	BIOLOGICAL_PROCESS	0.000778731	1.23203e-05	13	284	1324	131725
OVER	GO:0042908	xenobiotic transport	BIOLOGICAL_PROCESS	0.00107208	1.80517e-05	13	295	1324	131714
OVER	GO:0006857	oligopeptide transport	BIOLOGICAL_PROCESS	0.00289812	5.96064e-05	13	333	1324	131676
OVER	GO:0009753	response to jasmonic acid	BIOLOGICAL_PROCESS	0.00139729	2.43724e-05	12	260	1325	131749
OVER	GO:0006568	tryptophan metabolic process	BIOLOGICAL_PROCESS	7.66998e-06	7.6275e-08	11	116	1326	131893
OVER	GO:0006586	indolalkylamine metabolic process	BIOLOGICAL_PROCESS	7.66998e-06	7.6275e-08	11	116	1326	131893
OVER	GO:0009069	serine family amino acid metabolic process	BIOLOGICAL_PROCESS	0.00274232	5.57824e-05	11	240	1326	131769
OVER	GO:0042435	indole-containing compound biosynthetic process	BIOLOGICAL_PROCESS	0.000982359	1.6319e-05	10	170	1327	131839
OVER	GO:0009070	serine family amino acid biosynthetic process	BIOLOGICAL_PROCESS	0.00116364	1.9725e-05	10	174	1327	131835
OVER	GO:0042401	cellular biogenic amine biosynthetic process	BIOLOGICAL_PROCESS	0.00120312	2.06661e-05	10	175	1327	131834
OVER	GO:0009309	amine biosynthetic process	BIOLOGICAL_PROCESS	0.00120312	2.06661e-05	10	175	1327	131834
OVER	GO:0016998	cell wall macromolecule catabolic process	BIOLOGICAL_PROCESS	0.00465695	0.000103149	10	214	1327	131795
OVER	GO:0046219	indolalkylamine biosynthetic process	BIOLOGICAL_PROCESS	9.70401e-05	1.26112e-06	8	70	1329	131939
OVER	GO:0000162	tryptophan biosynthetic process	BIOLOGICAL_PROCESS	9.70401e-05	1.26112e-06	8	70	1329	131939
OVER	GO:1901071	glucosamine-containing compound metabolic process	BIOLOGICAL_PROCESS	0.00096893	1.55484e-05	8	101	1329	131908
OVER	GO:0006040	amino sugar metabolic process	BIOLOGICAL_PROCESS	0.00803681	0.000188001	8	147	1329	131862
OVER	GO:0031349	positive regulation of defense response	BIOLOGICAL_PROCESS	0.00946854	0.000223633	8	151	1329	131858
OVER	GO:1901072	glucosamine-containing compound catabolic process	BIOLOGICAL_PROCESS	0.0018922	3.63514e-05	7	83	1330	131926
OVER	GO:0046348	amino sugar catabolic process	BIOLOGICAL_PROCESS	0.0018922	3.63514e-05	7	83	1330	131926
OVER	GO:0006026	aminoglycan catabolic process	BIOLOGICAL_PROCESS	0.0018922	3.63514e-05	7	83	1330	131926
OVER	GO:0006032	chitin catabolic process	BIOLOGICAL_PROCESS	0.0018922	3.63514e-05	7	83	1330	131926
OVER	GO:0006030	chitin metabolic process	BIOLOGICAL_PROCESS	0.0018922	3.63514e-05	7	83	1330	131926
OVER	GO:0006022	aminoglycan metabolic process	BIOLOGICAL_PROCESS	0.00401202	8.61436e-05	7	96	1330	131913
OVER	GO:0009065	glutamine family amino acid catabolic process	BIOLOGICAL_PROCESS	0.00123018	2.12699e-05	6	50	1331	131959
OVER	GO:0006525	arginine metabolic process	BIOLOGICAL_PROCESS	0.00662648	0.000149768	6	73	1331	131936
OVER	GO:0015800	acidic amino acid transport	BIOLOGICAL_PROCESS	0.000980321	1.61744e-05	5	27	1332	131982
OVER	GO:0015813	L-glutamate transmembrane transport	BIOLOGICAL_PROCESS	0.000980321	1.61744e-05	5	27	1332	131982
OVER	GO:1903401	L-lysine transmembrane transport	BIOLOGICAL_PROCESS	0.00141543	2.54327e-05	5	30	1332	131979
OVER	GO:1902022	L-lysine transport	BIOLOGICAL_PROCESS	0.00141543	2.54327e-05	5	30	1332	131979
OVER	GO:1902475	L-alpha-amino acid transmembrane transport	BIOLOGICAL_PROCESS	0.0033887	7.05728e-05	5	38	1332	131971
OVER	GO:0015807	L-amino acid transport	BIOLOGICAL_PROCESS	0.00447153	9.80311e-05	5	41	1332	131968
OVER	GO:0110165	cellular anatomical entity	CELLULAR_COMPONENT	4.33212e-15	6.36429e-18	819	65370	518	66639
OVER	GO:0016020	membrane	CELLULAR_COMPONENT	5.36113e-08	3.81683e-10	536	42261	801	89748
OVER	GO:0031224	intrinsic component of membrane	CELLULAR_COMPONENT	2.19701e-13	5.13907e-16	474	33605	863	98404
OVER	GO:0016021	integral component of membrane	CELLULAR_COMPONENT	1.27046e-11	4.30712e-14	460	33213	877	98796
OVER	GO:0071944	cell periphery	CELLULAR_COMPONENT	2.85913e-18	6.46204e-22	202	9686	1135	122323
OVER	GO:0005886	plasma membrane	CELLULAR_COMPONENT	6.57018e-18	2.96991e-21	183	8498	1154	123511
OVER	GO:0005576	extracellular region	CELLULAR_COMPONENT	0.00283655	5.80195e-05	49	2626	1288	129383
OVER	GO:0031226	intrinsic component of plasma membrane	CELLULAR_COMPONENT	0.000248533	3.48266e-06	37	1555	1300	130454
OVER	GO:0046658	anchored component of plasma membrane	CELLULAR_COMPONENT	0.00366949	7.79595e-05	19	660	1318	131349
OVER	GO:0031225	anchored component of membrane	CELLULAR_COMPONENT	0.00527605	0.000117458	19	682	1318	131327
OVER	GO:0003824	catalytic activity	MOLECULAR_FUNCTION	4.26129e-47	4.81556e-51	808	52731	529	79278
OVER	GO:0005488	binding	MOLECULAR_FUNCTION	0.000304308	4.29862e-06	642	55330	695	76679
OVER	GO:0043167	ion binding	MOLECULAR_FUNCTION	3.22238e-16	3.27737e-19	479	32746	858	99263
OVER	GO:0016740	transferase activity	MOLECULAR_FUNCTION	5.7472e-17	3.24737e-20	372	23246	965	108763
OVER	GO:0036094	small molecule binding	MOLECULAR_FUNCTION	1.00559e-09	4.65919e-12	306	20686	1031	111323
OVER	GO:0043168	anion binding	MOLECULAR_FUNCTION	4.48492e-11	1.7739e-13	305	20037	1032	111972
OVER	GO:1901265	nucleoside phosphate binding	MOLECULAR_FUNCTION	1.7775e-07	1.34583e-09	283	19805	1054	112204
OVER	GO:0000166	nucleotide binding	MOLECULAR_FUNCTION	1.7775e-07	1.34583e-09	283	19805	1054	112204
OVER	GO:0097367	carbohydrate derivative binding	MOLECULAR_FUNCTION	1.47601e-06	1.23431e-08	257	18032	1080	113977
OVER	GO:0032553	ribonucleotide binding	MOLECULAR_FUNCTION	2.94618e-06	2.77816e-08	253	17859	1084	114150
OVER	GO:0032555	purine ribonucleotide binding	MOLECULAR_FUNCTION	2.15322e-05	2.38462e-07	245	17640	1092	114369
OVER	GO:0017076	purine nucleotide binding	MOLECULAR_FUNCTION	2.58408e-05	2.9202e-07	245	17686	1092	114323
OVER	GO:0032559	adenyl ribonucleotide binding	MOLECULAR_FUNCTION	2.1397e-06	1.91023e-08	238	16503	1099	115506
OVER	GO:0030554	adenyl nucleotide binding	MOLECULAR_FUNCTION	2.45208e-06	2.27224e-08	238	16538	1099	115471
OVER	GO:0035639	purine ribonucleoside triphosphate binding	MOLECULAR_FUNCTION	1.2291e-09	5.83366e-12	232	14590	1105	117419
OVER	GO:0005524	ATP binding	MOLECULAR_FUNCTION	2.77432e-11	1.06596e-13	225	13453	1112	118556
OVER	GO:0140096	catalytic activity, acting on a protein	MOLECULAR_FUNCTION	0.00150953	2.79764e-05	214	16109	1123	115900
OVER	GO:0043169	cation binding	MOLECULAR_FUNCTION	0.000115483	1.51385e-06	209	14959	1128	117050
OVER	GO:0046872	metal ion binding	MOLECULAR_FUNCTION	0.000137161	1.86002e-06	207	14834	1130	117175
OVER	GO:0016772	transferase activity, transferring phosphorus-containing groups	MOLECULAR_FUNCTION	2.58717e-10	1.14024e-12	194	11346	1143	120663
OVER	GO:0016301	kinase activity	MOLECULAR_FUNCTION	2.95519e-13	7.34707e-16	192	10318	1145	121691
OVER	GO:0016491	oxidoreductase activity	MOLECULAR_FUNCTION	1.7469e-12	5.33011e-15	174	9203	1163	122806
OVER	GO:0016773	phosphotransferase activity, alcohol group as acceptor	MOLECULAR_FUNCTION	4.19482e-13	1.0903e-15	171	8820	1166	123189
OVER	GO:0004672	protein kinase activity	MOLECULAR_FUNCTION	2.19701e-13	5.21384e-16	161	8031	1176	123978
OVER	GO:0005215	transporter activity	MOLECULAR_FUNCTION	5.94415e-15	9.40424e-18	137	6041	1200	125968
OVER	GO:0022857	transmembrane transporter activity	MOLECULAR_FUNCTION	4.33212e-15	5.97871e-18	132	5679	1205	126330
OVER	GO:0004674	protein serine/threonine kinase activity	MOLECULAR_FUNCTION	6.30986e-10	2.85223e-12	108	5124	1229	126885
OVER	GO:0022804	active transmembrane transporter activity	MOLECULAR_FUNCTION	1.76937e-14	2.99928e-17	79	2566	1258	129443
OVER	GO:0015318	inorganic molecular entity transmembrane transporter activity	MOLECULAR_FUNCTION	1.3344e-06	1.08574e-08	69	3194	1268	128815
OVER	GO:0015075	ion transmembrane transporter activity	MOLECULAR_FUNCTION	2.94618e-06	2.79669e-08	68	3208	1269	128801
OVER	GO:0016757	transferase activity, transferring glycosyl groups	MOLECULAR_FUNCTION	0.00187387	3.49405e-05	63	3599	1274	128410
OVER	GO:0016798	hydrolase activity, acting on glycosyl bonds	MOLECULAR_FUNCTION	1.49974e-05	1.57617e-07	55	2484	1282	129525
OVER	GO:0046906	tetrapyrrole binding	MOLECULAR_FUNCTION	0.000541396	8.19834e-06	55	2846	1282	129163
OVER	GO:0020037	heme binding	MOLECULAR_FUNCTION	0.000546481	8.33709e-06	53	2706	1284	129303
OVER	GO:0015291	secondary active transmembrane transporter activity	MOLECULAR_FUNCTION	7.98612e-11	3.24896e-13	51	1491	1286	130518
OVER	GO:0016829	lyase activity	MOLECULAR_FUNCTION	0.000508473	7.5274e-06	45	2142	1292	129867
OVER	GO:0004553	hydrolase activity, hydrolyzing O-glycosyl compounds	MOLECULAR_FUNCTION	0.000541396	8.14346e-06	45	2149	1292	129860
OVER	GO:0008324	cation transmembrane transporter activity	MOLECULAR_FUNCTION	0.00233096	4.61993e-05	45	2315	1292	129694
OVER	GO:0016758	transferase activity, transferring hexosyl groups	MOLECULAR_FUNCTION	0.00344399	7.23903e-05	45	2362	1292	129647
OVER	GO:0030246	carbohydrate binding	MOLECULAR_FUNCTION	6.67205e-05	8.06769e-07	42	1767	1295	130242
OVER	GO:0022853	active ion transmembrane transporter activity	MOLECULAR_FUNCTION	2.87682e-05	3.28352e-07	35	1282	1302	130727
OVER	GO:0008194	UDP-glycosyltransferase activity	MOLECULAR_FUNCTION	0.00422873	9.17523e-05	34	1617	1303	130392
OVER	GO:0016765	transferase activity, transferring alkyl or aryl (other than methyl) groups	MOLECULAR_FUNCTION	8.95705e-09	4.76538e-11	31	707	1306	131302
OVER	GO:0015293	symporter activity	MOLECULAR_FUNCTION	1.83523e-08	1.09919e-10	29	644	1308	131365
OVER	GO:0042626	ATPase-coupled transmembrane transporter activity	MOLECULAR_FUNCTION	0.00021261	2.95525e-06	28	999	1309	131010
OVER	GO:0015399	primary active transmembrane transporter activity	MOLECULAR_FUNCTION	0.000711162	1.09298e-05	28	1075	1309	130934
OVER	GO:0015295	solute:proton symporter activity	MOLECULAR_FUNCTION	3.57703e-08	2.22326e-10	27	578	1310	131431
OVER	GO:0015294	solute:cation symporter activity	MOLECULAR_FUNCTION	5.17221e-08	3.53377e-10	27	591	1310	131418
OVER	GO:0051213	dioxygenase activity	MOLECULAR_FUNCTION	7.81008e-06	7.85509e-08	27	774	1310	131235
OVER	GO:0008509	anion transmembrane transporter activity	MOLECULAR_FUNCTION	4.2459e-05	4.94212e-07	26	800	1311	131209
OVER	GO:0004364	glutathione transferase activity	MOLECULAR_FUNCTION	1.80684e-11	6.53396e-14	25	332	1312	131677
OVER	GO:0008514	organic anion transmembrane transporter activity	MOLECULAR_FUNCTION	2.59294e-08	1.58231e-10	24	447	1313	131562
OVER	GO:0005342	organic acid transmembrane transporter activity	MOLECULAR_FUNCTION	1.04412e-08	6.01766e-11	21	317	1316	131692
OVER	GO:0046943	carboxylic acid transmembrane transporter activity	MOLECULAR_FUNCTION	1.04412e-08	6.01766e-11	21	317	1316	131692
OVER	GO:0015297	antiporter activity	MOLECULAR_FUNCTION	0.00233802	4.67656e-05	20	690	1317	131319
OVER	GO:0015171	amino acid transmembrane transporter activity	MOLECULAR_FUNCTION	8.95705e-09	4.85861e-11	19	248	1318	131761
OVER	GO:0016830	carbon-carbon lyase activity	MOLECULAR_FUNCTION	0.00196162	3.81285e-05	19	624	1318	131385
OVER	GO:0015144	carbohydrate transmembrane transporter activity	MOLECULAR_FUNCTION	0.00147099	2.67633e-05	15	401	1322	131608
OVER	GO:0042887	amide transmembrane transporter activity	MOLECULAR_FUNCTION	0.00803681	0.000187359	15	481	1322	131528
OVER	GO:0005351	carbohydrate:proton symporter activity	MOLECULAR_FUNCTION	0.000309769	4.44577e-06	13	257	1324	131752
OVER	GO:0005402	carbohydrate:cation symporter activity	MOLECULAR_FUNCTION	0.000309769	4.44577e-06	13	257	1324	131752
OVER	GO:0015333	peptide:proton symporter activity	MOLECULAR_FUNCTION	0.000740943	1.14713e-05	13	282	1324	131727
OVER	GO:0042910	xenobiotic transmembrane transporter activity	MOLECULAR_FUNCTION	0.00107208	1.80517e-05	13	295	1324	131714
OVER	GO:0035673	oligopeptide transmembrane transporter activity	MOLECULAR_FUNCTION	0.00200494	3.91971e-05	13	319	1324	131690
OVER	GO:0016701	oxidoreductase activity, acting on single donors with incorporation of molecular oxygen	MOLECULAR_FUNCTION	0.00211925	4.16713e-05	11	232	1326	131777
OVER	GO:0004568	chitinase activity	MOLECULAR_FUNCTION	7.83729e-05	9.9195e-07	9	93	1328	131916
OVER	GO:1900750	oligopeptide binding	MOLECULAR_FUNCTION	0.00150167	2.76611e-05	8	110	1329	131899
OVER	GO:0043295	glutathione binding	MOLECULAR_FUNCTION	0.00150167	2.76611e-05	8	110	1329	131899
OVER	GO:0072341	modified amino acid binding	MOLECULAR_FUNCTION	0.00803681	0.000188001	8	147	1329	131862
OVER	GO:0042973	glucan endo-1,3-beta-D-glucosidase activity	MOLECULAR_FUNCTION	0.00096893	1.5515e-05	7	72	1330	131937
OVER	GO:0008061	chitin binding	MOLECULAR_FUNCTION	0.00422873	9.15652e-05	7	97	1330	131912
OVER	GO:0005313	L-glutamate transmembrane transporter activity	MOLECULAR_FUNCTION	0.000980321	1.61744e-05	5	27	1332	131982
OVER	GO:0015172	acidic amino acid transmembrane transporter activity	MOLECULAR_FUNCTION	0.000980321	1.61744e-05	5	27	1332	131982
OVER	GO:0015174	basic amino acid transmembrane transporter activity	MOLECULAR_FUNCTION	0.00141543	2.54327e-05	5	30	1332	131979
OVER	GO:0015189	L-lysine transmembrane transporter activity	MOLECULAR_FUNCTION	0.00141543	2.54327e-05	5	30	1332	131979
OVER	GO:0015179	L-amino acid transmembrane transporter activity	MOLECULAR_FUNCTION	0.00447153	9.80311e-05	5	41	1332	131968
OVER	GO:0005310	dicarboxylic acid transmembrane transporter activity	MOLECULAR_FUNCTION	0.00767213	0.000176869	5	47	1332	131962

## Sheet: 1H_SC_vs_SI_up
Tags	GO ID	GO Name	GO Category	FDR	P-Value	Nr test	Nr Reference	Non Annotated Test	Non Annotated Ref
OVER	GO:0009987	cellular process	BIOLOGICAL_PROCESS	8.58525e-12	2.81356e-14	988	62447	760	69151
OVER	GO:0008152	metabolic process	BIOLOGICAL_PROCESS	3.01793e-19	1.38409e-22	983	58617	765	72981
OVER	GO:0071704	organic substance metabolic process	BIOLOGICAL_PROCESS	1.80182e-07	1.07918e-09	771	48748	977	82850
OVER	GO:0044237	cellular metabolic process	BIOLOGICAL_PROCESS	2.90778e-07	1.90588e-09	753	47577	995	84021
OVER	GO:0044238	primary metabolic process	BIOLOGICAL_PROCESS	0.000272779	3.85324e-06	702	45987	1046	85611
OVER	GO:0006807	nitrogen compound metabolic process	BIOLOGICAL_PROCESS	0.00532054	0.00011003	613	40644	1135	90954
OVER	GO:1901564	organonitrogen compound metabolic process	BIOLOGICAL_PROCESS	4.70491e-11	1.86091e-13	490	27172	1258	104426
OVER	GO:0006793	phosphorus metabolic process	BIOLOGICAL_PROCESS	6.29406e-12	1.92044e-14	292	14017	1456	117581
OVER	GO:0006796	phosphate-containing compound metabolic process	BIOLOGICAL_PROCESS	4.65731e-12	1.26314e-14	291	13906	1457	117692
OVER	GO:0050896	response to stimulus	BIOLOGICAL_PROCESS	2.90778e-07	1.85216e-09	266	13917	1482	117681
OVER	GO:0006464	cellular protein modification process	BIOLOGICAL_PROCESS	0.000153814	2.10323e-06	253	14280	1495	117318
OVER	GO:0036211	protein modification process	BIOLOGICAL_PROCESS	0.000153814	2.10323e-06	253	14280	1495	117318
OVER	GO:0055114	oxidation-reduction process	BIOLOGICAL_PROCESS	1.66722e-18	1.13045e-21	241	9441	1507	122157
OVER	GO:0016310	phosphorylation	BIOLOGICAL_PROCESS	1.49148e-12	3.70804e-15	241	10757	1507	120841
OVER	GO:0051179	localization	BIOLOGICAL_PROCESS	2.5327e-05	2.51287e-07	225	12063	1523	119535
OVER	GO:0051234	establishment of localization	BIOLOGICAL_PROCESS	3.66559e-05	4.05953e-07	217	11627	1531	119971
OVER	GO:0006810	transport	BIOLOGICAL_PROCESS	3.01027e-05	3.16274e-07	215	11457	1533	120141
OVER	GO:0006468	protein phosphorylation	BIOLOGICAL_PROCESS	2.94422e-13	6.32163e-16	192	7777	1556	123821
OVER	GO:0044281	small molecule metabolic process	BIOLOGICAL_PROCESS	3.01793e-19	1.70524e-22	187	6435	1561	125163
OVER	GO:0055085	transmembrane transport	BIOLOGICAL_PROCESS	3.4192e-10	1.50694e-12	154	6313	1594	125285
OVER	GO:0006950	response to stress	BIOLOGICAL_PROCESS	6.47522e-05	7.82968e-07	153	7675	1595	123923
OVER	GO:0009056	catabolic process	BIOLOGICAL_PROCESS	0.000380266	5.58646e-06	150	7774	1598	123824
OVER	GO:0043436	oxoacid metabolic process	BIOLOGICAL_PROCESS	2.15742e-17	1.95043e-20	132	3989	1616	127609
OVER	GO:0006082	organic acid metabolic process	BIOLOGICAL_PROCESS	3.6362e-17	3.69825e-20	132	4021	1616	127577
OVER	GO:0019752	carboxylic acid metabolic process	BIOLOGICAL_PROCESS	1.7484e-17	1.38307e-20	131	3925	1617	127673
OVER	GO:0042221	response to chemical	BIOLOGICAL_PROCESS	3.12566e-06	2.50788e-08	131	5925	1617	125673
OVER	GO:1901575	organic substance catabolic process	BIOLOGICAL_PROCESS	0.00448928	8.92356e-05	125	6630	1623	124968
OVER	GO:0071702	organic substance transport	BIOLOGICAL_PROCESS	0.00154771	2.58855e-05	109	5441	1639	126157
OVER	GO:0006811	ion transport	BIOLOGICAL_PROCESS	1.85075e-06	1.4291e-08	103	4265	1645	127333
OVER	GO:0005975	carbohydrate metabolic process	BIOLOGICAL_PROCESS	0.00057927	9.2301e-06	96	4520	1652	127078
OVER	GO:0044283	small molecule biosynthetic process	BIOLOGICAL_PROCESS	5.45787e-12	1.60362e-14	87	2555	1661	129043
OVER	GO:0006520	cellular amino acid metabolic process	BIOLOGICAL_PROCESS	7.14508e-15	1.21117e-17	78	1867	1670	129731
OVER	GO:0006952	defense response	BIOLOGICAL_PROCESS	1.24818e-09	6.20637e-12	78	2432	1670	129166
OVER	GO:0034220	ion transmembrane transport	BIOLOGICAL_PROCESS	8.83505e-05	1.14819e-06	74	3038	1674	128560
OVER	GO:0016053	organic acid biosynthetic process	BIOLOGICAL_PROCESS	2.24822e-11	8.38415e-14	70	1866	1678	129732
OVER	GO:0046394	carboxylic acid biosynthetic process	BIOLOGICAL_PROCESS	2.24822e-11	8.38415e-14	70	1866	1678	129732
OVER	GO:0006812	cation transport	BIOLOGICAL_PROCESS	0.00161569	2.74514e-05	65	2825	1683	128773
OVER	GO:0009605	response to external stimulus	BIOLOGICAL_PROCESS	8.64924e-05	1.11427e-06	60	2276	1688	129322
OVER	GO:1901700	response to oxygen-containing compound	BIOLOGICAL_PROCESS	0.00177512	3.06919e-05	60	2552	1688	129046
OVER	GO:1901605	alpha-amino acid metabolic process	BIOLOGICAL_PROCESS	2.31905e-15	3.14483e-18	59	1100	1689	130498
OVER	GO:0009607	response to biotic stimulus	BIOLOGICAL_PROCESS	9.21841e-06	8.22979e-08	55	1846	1693	129752
OVER	GO:0044419	interspecies interaction between organisms	BIOLOGICAL_PROCESS	9.13674e-05	1.19772e-06	53	1915	1695	129683
OVER	GO:0043207	response to external biotic stimulus	BIOLOGICAL_PROCESS	3.55319e-05	3.8949e-07	51	1741	1697	129857
OVER	GO:0051707	response to other organism	BIOLOGICAL_PROCESS	3.55319e-05	3.8949e-07	51	1741	1697	129857
OVER	GO:0006790	sulfur compound metabolic process	BIOLOGICAL_PROCESS	2.73316e-10	1.17369e-12	50	1131	1698	130467
OVER	GO:0032787	monocarboxylic acid metabolic process	BIOLOGICAL_PROCESS	0.000457013	6.92052e-06	50	1882	1698	129716
OVER	GO:0098542	defense response to other organism	BIOLOGICAL_PROCESS	6.34507e-05	7.6006e-07	46	1533	1702	130065
OVER	GO:0008652	cellular amino acid biosynthetic process	BIOLOGICAL_PROCESS	2.15002e-11	7.53199e-14	41	723	1707	130875
OVER	GO:0006820	anion transport	BIOLOGICAL_PROCESS	2.60633e-05	2.64138e-07	41	1236	1707	130362
OVER	GO:0044282	small molecule catabolic process	BIOLOGICAL_PROCESS	3.22089e-08	1.81992e-10	39	862	1709	130736
OVER	GO:1901607	alpha-amino acid biosynthetic process	BIOLOGICAL_PROCESS	3.15604e-09	1.60495e-11	35	646	1713	130952
OVER	GO:0015711	organic anion transport	BIOLOGICAL_PROCESS	1.79641e-06	1.36015e-08	33	766	1715	130832
OVER	GO:0016052	carbohydrate catabolic process	BIOLOGICAL_PROCESS	0.00280948	5.01637e-05	32	1089	1716	130509
OVER	GO:0098656	anion transmembrane transport	BIOLOGICAL_PROCESS	1.03056e-05	9.31688e-08	30	711	1718	130887
OVER	GO:0006575	cellular modified amino acid metabolic process	BIOLOGICAL_PROCESS	1.1215e-07	6.59033e-10	29	529	1719	131069
OVER	GO:0006749	glutathione metabolic process	BIOLOGICAL_PROCESS	7.12751e-10	3.4281e-12	27	359	1721	131239
OVER	GO:0016054	organic acid catabolic process	BIOLOGICAL_PROCESS	3.95075e-06	3.30383e-08	27	561	1721	131037
OVER	GO:0046395	carboxylic acid catabolic process	BIOLOGICAL_PROCESS	3.95075e-06	3.30383e-08	27	561	1721	131037
OVER	GO:0002376	immune system process	BIOLOGICAL_PROCESS	0.000380266	5.54602e-06	25	654	1723	130944
OVER	GO:0006955	immune response	BIOLOGICAL_PROCESS	0.000341571	4.9408e-06	24	607	1724	130991
OVER	GO:0009308	amine metabolic process	BIOLOGICAL_PROCESS	9.11253e-06	8.03229e-08	23	439	1725	131159
OVER	GO:0045087	innate immune response	BIOLOGICAL_PROCESS	0.000750992	1.20512e-05	23	599	1725	130999
OVER	GO:0009072	aromatic amino acid family metabolic process	BIOLOGICAL_PROCESS	6.98671e-07	4.73728e-09	22	341	1726	131257
OVER	GO:1903825	organic acid transmembrane transport	BIOLOGICAL_PROCESS	9.72199e-07	7.03139e-09	22	349	1726	131249
OVER	GO:1905039	carboxylic acid transmembrane transport	BIOLOGICAL_PROCESS	9.72199e-07	7.03139e-09	22	349	1726	131249
OVER	GO:0046942	carboxylic acid transport	BIOLOGICAL_PROCESS	2.18525e-05	2.07437e-07	22	428	1726	131170
OVER	GO:0015849	organic acid transport	BIOLOGICAL_PROCESS	2.18525e-05	2.07437e-07	22	428	1726	131170
OVER	GO:0008643	carbohydrate transport	BIOLOGICAL_PROCESS	0.000878309	1.42927e-05	21	521	1727	131077
OVER	GO:1901606	alpha-amino acid catabolic process	BIOLOGICAL_PROCESS	5.97417e-07	3.98323e-09	20	277	1728	131321
OVER	GO:0009063	cellular amino acid catabolic process	BIOLOGICAL_PROCESS	4.88692e-06	4.19715e-08	20	322	1728	131276
OVER	GO:0003333	amino acid transmembrane transport	BIOLOGICAL_PROCESS	3.34696e-06	2.72326e-08	19	282	1729	131316
OVER	GO:0006865	amino acid transport	BIOLOGICAL_PROCESS	5.24895e-06	4.5674e-08	19	292	1729	131306
OVER	GO:0009064	glutamine family amino acid metabolic process	BIOLOGICAL_PROCESS	7.09443e-05	8.65859e-07	18	323	1730	131275
OVER	GO:0044106	cellular amine metabolic process	BIOLOGICAL_PROCESS	0.000409622	6.06401e-06	16	301	1732	131297
OVER	GO:0034219	carbohydrate transmembrane transport	BIOLOGICAL_PROCESS	0.00183292	3.18984e-05	16	347	1732	131251
OVER	GO:0006576	cellular biogenic amine metabolic process	BIOLOGICAL_PROCESS	0.000466881	7.12272e-06	15	270	1733	131328
OVER	GO:0009073	aromatic amino acid family biosynthetic process	BIOLOGICAL_PROCESS	5.86531e-05	6.95963e-07	14	191	1734	131407
OVER	GO:0006855	drug transmembrane transport	BIOLOGICAL_PROCESS	0.00044961	6.75761e-06	14	235	1734	131363
OVER	GO:0015893	drug transport	BIOLOGICAL_PROCESS	0.00044961	6.75761e-06	14	235	1734	131363
OVER	GO:0042493	response to drug	BIOLOGICAL_PROCESS	0.000478034	7.40091e-06	14	237	1734	131361
OVER	GO:0042908	xenobiotic transport	BIOLOGICAL_PROCESS	0.00368116	7.01741e-05	14	294	1734	131304
OVER	GO:0042430	indole-containing compound metabolic process	BIOLOGICAL_PROCESS	0.000302304	4.33864e-06	13	194	1735	131404
OVER	GO:0006767	water-soluble vitamin metabolic process	BIOLOGICAL_PROCESS	0.00515544	0.000105451	13	268	1735	131330
OVER	GO:0042537	benzene-containing compound metabolic process	BIOLOGICAL_PROCESS	0.0085114	0.000181789	13	284	1735	131314
OVER	GO:0009069	serine family amino acid metabolic process	BIOLOGICAL_PROCESS	0.0067289	0.000141437	12	239	1736	131359
OVER	GO:0006568	tryptophan metabolic process	BIOLOGICAL_PROCESS	8.28628e-05	1.05814e-06	11	116	1737	131482
OVER	GO:0006586	indolalkylamine metabolic process	BIOLOGICAL_PROCESS	8.28628e-05	1.05814e-06	11	116	1737	131482
OVER	GO:0042435	indole-containing compound biosynthetic process	BIOLOGICAL_PROCESS	0.00174117	2.99083e-05	11	169	1737	131429
OVER	GO:0009070	serine family amino acid biosynthetic process	BIOLOGICAL_PROCESS	0.00841291	0.000178735	10	174	1738	131424
OVER	GO:0042401	cellular biogenic amine biosynthetic process	BIOLOGICAL_PROCESS	0.0086522	0.000186752	10	175	1738	131423
OVER	GO:0009309	amine biosynthetic process	BIOLOGICAL_PROCESS	0.0086522	0.000186752	10	175	1738	131423
OVER	GO:0006525	arginine metabolic process	BIOLOGICAL_PROCESS	8.06815e-05	1.01205e-06	9	70	1739	131528
OVER	GO:0009084	glutamine family amino acid biosynthetic process	BIOLOGICAL_PROCESS	0.00250927	4.39527e-05	9	116	1739	131482
OVER	GO:0046219	indolalkylamine biosynthetic process	BIOLOGICAL_PROCESS	0.000564384	8.92911e-06	8	70	1740	131528
OVER	GO:0000162	tryptophan biosynthetic process	BIOLOGICAL_PROCESS	0.000564384	8.92911e-06	8	70	1740	131528
OVER	GO:0010200	response to chitin	BIOLOGICAL_PROCESS	0.00157185	2.6467e-05	6	39	1742	131559
OVER	GO:0009065	glutamine family amino acid catabolic process	BIOLOGICAL_PROCESS	0.00458847	9.33354e-05	6	50	1742	131548
OVER	GO:0015800	acidic amino acid transport	BIOLOGICAL_PROCESS	0.0031538	5.77371e-05	5	27	1743	131571
OVER	GO:0015813	L-glutamate transmembrane transport	BIOLOGICAL_PROCESS	0.0031538	5.77371e-05	5	27	1743	131571
OVER	GO:1903401	L-lysine transmembrane transport	BIOLOGICAL_PROCESS	0.00448928	9.00941e-05	5	30	1743	131568
OVER	GO:1902022	L-lysine transport	BIOLOGICAL_PROCESS	0.00448928	9.00941e-05	5	30	1743	131568
OVER	GO:0110165	cellular anatomical entity	CELLULAR_COMPONENT	2.77212e-15	4.38576e-18	1046	65143	702	66455
OVER	GO:0016020	membrane	CELLULAR_COMPONENT	1.1215e-07	6.56064e-10	681	42116	1067	89482
OVER	GO:0031224	intrinsic component of membrane	CELLULAR_COMPONENT	6.97161e-12	2.20596e-14	588	33491	1160	98107
OVER	GO:0016021	integral component of membrane	CELLULAR_COMPONENT	1.34098e-10	5.45547e-13	574	33099	1174	98499
OVER	GO:0071944	cell periphery	CELLULAR_COMPONENT	4.14137e-16	5.14804e-19	236	9652	1512	121946
OVER	GO:0005886	plasma membrane	CELLULAR_COMPONENT	2.47988e-15	3.64317e-18	212	8469	1536	123129
OVER	GO:0031226	intrinsic component of plasma membrane	CELLULAR_COMPONENT	7.62194e-05	9.46806e-07	46	1546	1702	130052
OVER	GO:0003824	catalytic activity	MOLECULAR_FUNCTION	6.95369e-50	7.85817e-54	1020	52519	728	79079
OVER	GO:0005488	binding	MOLECULAR_FUNCTION	9.96211e-07	7.31763e-09	851	55121	897	76477
OVER	GO:0043167	ion binding	MOLECULAR_FUNCTION	3.60749e-21	8.15345e-25	627	32598	1121	99000
OVER	GO:0097159	organic cyclic compound binding	MOLECULAR_FUNCTION	0.00541416	0.000112578	594	39271	1154	92327
OVER	GO:1901363	heterocyclic compound binding	MOLECULAR_FUNCTION	0.00569788	0.000119122	593	39219	1155	92379
OVER	GO:0016740	transferase activity	MOLECULAR_FUNCTION	4.01876e-20	1.36245e-23	477	23141	1271	108457
OVER	GO:0043168	anion binding	MOLECULAR_FUNCTION	4.91581e-13	1.11104e-15	392	19950	1356	111648
OVER	GO:0036094	small molecule binding	MOLECULAR_FUNCTION	2.50465e-10	1.04726e-12	387	20605	1361	110993
OVER	GO:1901265	nucleoside phosphate binding	MOLECULAR_FUNCTION	2.90778e-07	1.88289e-09	355	19733	1393	111865
OVER	GO:0000166	nucleotide binding	MOLECULAR_FUNCTION	2.90778e-07	1.88289e-09	355	19733	1393	111865
OVER	GO:0097367	carbohydrate derivative binding	MOLECULAR_FUNCTION	1.79973e-05	1.6474e-07	316	17973	1432	113625
OVER	GO:0032553	ribonucleotide binding	MOLECULAR_FUNCTION	3.46071e-05	3.71531e-07	311	17801	1437	113797
OVER	GO:0032555	purine ribonucleotide binding	MOLECULAR_FUNCTION	0.000233464	3.21874e-06	301	17584	1447	114014
OVER	GO:0017076	purine nucleotide binding	MOLECULAR_FUNCTION	0.000278162	3.96072e-06	301	17630	1447	113968
OVER	GO:0035639	purine ribonucleoside triphosphate binding	MOLECULAR_FUNCTION	4.2597e-10	1.92551e-12	291	14531	1457	117067
OVER	GO:0043169	cation binding	MOLECULAR_FUNCTION	4.6867e-09	2.4363e-11	291	14877	1457	116721
OVER	GO:0032559	adenyl ribonucleotide binding	MOLECULAR_FUNCTION	4.3516e-05	4.86844e-07	290	16451	1458	115147
OVER	GO:0030554	adenyl nucleotide binding	MOLECULAR_FUNCTION	4.98873e-05	5.80675e-07	290	16486	1458	115112
OVER	GO:0046872	metal ion binding	MOLECULAR_FUNCTION	7.19014e-09	3.90018e-11	288	14753	1460	116845
OVER	GO:0005524	ATP binding	MOLECULAR_FUNCTION	1.54925e-11	5.25228e-14	280	13398	1468	118200
OVER	GO:0140096	catalytic activity, acting on a protein	MOLECULAR_FUNCTION	0.000243308	3.38196e-06	278	16045	1470	115553
OVER	GO:0016772	transferase activity, transferring phosphorus-containing groups	MOLECULAR_FUNCTION	6.21774e-10	2.88086e-12	238	11302	1510	120296
OVER	GO:0016301	kinase activity	MOLECULAR_FUNCTION	2.76588e-13	5.39181e-16	236	10274	1512	121324
OVER	GO:0016491	oxidoreductase activity	MOLECULAR_FUNCTION	5.71195e-17	6.45491e-20	230	9147	1518	122451
OVER	GO:0016773	phosphotransferase activity, alcohol group as acceptor	MOLECULAR_FUNCTION	2.76588e-13	5.62615e-16	210	8781	1538	122817
OVER	GO:0004672	protein kinase activity	MOLECULAR_FUNCTION	4.94601e-13	1.17376e-15	195	7997	1553	123601
OVER	GO:0005215	transporter activity	MOLECULAR_FUNCTION	4.06459e-12	1.05645e-14	156	6022	1592	125576
OVER	GO:0022857	transmembrane transporter activity	MOLECULAR_FUNCTION	4.69392e-12	1.32611e-14	149	5662	1599	125936
OVER	GO:0004674	protein serine/threonine kinase activity	MOLECULAR_FUNCTION	4.17795e-11	1.60527e-13	135	5097	1613	126501
OVER	GO:0022804	active transmembrane transporter activity	MOLECULAR_FUNCTION	1.67384e-13	3.0265e-16	91	2554	1657	129044
OVER	GO:0016757	transferase activity, transferring glycosyl groups	MOLECULAR_FUNCTION	2.60633e-05	2.6508e-07	86	3576	1662	128022
OVER	GO:0015318	inorganic molecular entity transmembrane transporter activity	MOLECULAR_FUNCTION	2.5327e-05	2.51867e-07	79	3184	1669	128414
OVER	GO:0015075	ion transmembrane transporter activity	MOLECULAR_FUNCTION	4.91019e-05	5.65984e-07	78	3198	1670	128400
OVER	GO:0046906	tetrapyrrole binding	MOLECULAR_FUNCTION	1.86744e-05	1.73047e-07	73	2828	1675	128770
OVER	GO:0020037	heme binding	MOLECULAR_FUNCTION	0.000252178	3.53373e-06	66	2693	1682	128905
OVER	GO:0016758	transferase activity, transferring hexosyl groups	MOLECULAR_FUNCTION	3.0509e-05	3.24087e-07	63	2344	1685	129254
OVER	GO:0016798	hydrolase activity, acting on glycosyl bonds	MOLECULAR_FUNCTION	0.000849745	1.37319e-05	60	2479	1688	129119
OVER	GO:0016829	lyase activity	MOLECULAR_FUNCTION	5.29861e-05	6.22732e-07	58	2129	1690	129469
OVER	GO:0005506	iron ion binding	MOLECULAR_FUNCTION	0.0001355	1.80688e-06	57	2153	1691	129445
OVER	GO:0015291	secondary active transmembrane transporter activity	MOLECULAR_FUNCTION	1.12824e-08	6.24747e-11	55	1487	1693	130111
OVER	GO:0008194	UDP-glycosyltransferase activity	MOLECULAR_FUNCTION	1.75017e-06	1.30536e-08	52	1599	1696	129999
OVER	GO:0030246	carbohydrate binding	MOLECULAR_FUNCTION	2.29707e-05	2.23244e-07	52	1757	1696	129841
OVER	GO:0004497	monooxygenase activity	MOLECULAR_FUNCTION	0.00265671	4.71231e-05	50	2033	1698	129565
OVER	GO:0004553	hydrolase activity, hydrolyzing O-glycosyl compounds	MOLECULAR_FUNCTION	0.00768847	0.000162475	50	2144	1698	129454
OVER	GO:0022853	active ion transmembrane transporter activity	MOLECULAR_FUNCTION	0.00053062	8.27501e-06	38	1279	1710	130319
OVER	GO:0005509	calcium ion binding	MOLECULAR_FUNCTION	0.00519217	0.000106789	38	1449	1710	130149
OVER	GO:0016765	transferase activity, transferring alkyl or aryl (other than methyl) groups	MOLECULAR_FUNCTION	6.69285e-09	3.55479e-11	36	702	1712	130896
OVER	GO:0015399	primary active transmembrane transporter activity	MOLECULAR_FUNCTION	7.62194e-05	9.47467e-07	36	1067	1712	130531
OVER	GO:0042626	ATPase-coupled transmembrane transporter activity	MOLECULAR_FUNCTION	0.00010405	1.37573e-06	34	993	1714	130605
OVER	GO:0051213	dioxygenase activity	MOLECULAR_FUNCTION	1.85075e-06	1.44312e-08	33	768	1715	130830
OVER	GO:0008509	anion transmembrane transporter activity	MOLECULAR_FUNCTION	2.88827e-05	2.9702e-07	31	795	1717	130803
OVER	GO:0015293	symporter activity	MOLECULAR_FUNCTION	4.83213e-06	4.09549e-08	29	644	1719	130954
OVER	GO:0050660	flavin adenine dinucleotide binding	MOLECULAR_FUNCTION	0.00117539	1.95256e-05	27	798	1721	130800
OVER	GO:0004364	glutathione transferase activity	MOLECULAR_FUNCTION	7.12751e-10	3.46347e-12	26	331	1722	131267
OVER	GO:0008514	organic anion transmembrane transporter activity	MOLECULAR_FUNCTION	2.32645e-07	1.41969e-09	26	445	1722	131153
OVER	GO:0015295	solute:proton symporter activity	MOLECULAR_FUNCTION	2.20074e-05	2.11394e-07	26	579	1722	131019
OVER	GO:0015294	solute:cation symporter activity	MOLECULAR_FUNCTION	3.01027e-05	3.16369e-07	26	592	1722	131006
OVER	GO:0019842	vitamin binding	MOLECULAR_FUNCTION	0.00161569	2.75702e-05	23	633	1725	130965
OVER	GO:0015297	antiporter activity	MOLECULAR_FUNCTION	0.00448928	9.03032e-05	23	687	1725	130911
OVER	GO:0005342	organic acid transmembrane transporter activity	MOLECULAR_FUNCTION	9.72199e-07	6.81798e-09	21	317	1727	131281
OVER	GO:0046943	carboxylic acid transmembrane transporter activity	MOLECULAR_FUNCTION	9.72199e-07	6.81798e-09	21	317	1727	131281
OVER	GO:0030170	pyridoxal phosphate binding	MOLECULAR_FUNCTION	0.000996023	1.64334e-05	19	444	1729	131154
OVER	GO:0070279	vitamin B6 binding	MOLECULAR_FUNCTION	0.000996023	1.64334e-05	19	444	1729	131154
OVER	GO:0015171	amino acid transmembrane transporter activity	MOLECULAR_FUNCTION	2.91252e-06	2.30395e-08	18	249	1730	131349
OVER	GO:0015144	carbohydrate transmembrane transporter activity	MOLECULAR_FUNCTION	0.00265671	4.71357e-05	17	399	1731	131199
OVER	GO:0071949	FAD binding	MOLECULAR_FUNCTION	0.0045096	9.12215e-05	16	381	1732	131217
OVER	GO:1901681	sulfur compound binding	MOLECULAR_FUNCTION	0.000153814	2.09705e-06	14	211	1734	131387
OVER	GO:0042910	xenobiotic transmembrane transporter activity	MOLECULAR_FUNCTION	0.00368116	7.01741e-05	14	294	1734	131304
OVER	GO:0005351	carbohydrate:proton symporter activity	MOLECULAR_FUNCTION	0.00368116	7.07196e-05	13	257	1735	131341
OVER	GO:0005402	carbohydrate:cation symporter activity	MOLECULAR_FUNCTION	0.00368116	7.07196e-05	13	257	1735	131341
OVER	GO:0080044	quercetin 7-O-glucosyltransferase activity	MOLECULAR_FUNCTION	0.00323063	5.95087e-05	12	217	1736	131381
OVER	GO:0080043	quercetin 3-O-glucosyltransferase activity	MOLECULAR_FUNCTION	0.00359246	6.73916e-05	12	220	1736	131378
OVER	GO:1900750	oligopeptide binding	MOLECULAR_FUNCTION	4.43878e-05	5.06629e-07	11	107	1737	131491
OVER	GO:0043295	glutathione binding	MOLECULAR_FUNCTION	4.43878e-05	5.06629e-07	11	107	1737	131491
OVER	GO:0072341	modified amino acid binding	MOLECULAR_FUNCTION	0.000478034	7.374e-06	11	144	1737	131454
OVER	GO:0004568	chitinase activity	MOLECULAR_FUNCTION	0.00339678	6.33369e-05	8	94	1740	131504
OVER	GO:0008061	chitin binding	MOLECULAR_FUNCTION	0.00376222	7.2702e-05	8	96	1740	131502
OVER	GO:0042973	glucan endo-1,3-beta-D-glucosidase activity	MOLECULAR_FUNCTION	0.00430955	8.37658e-05	7	72	1741	131526
OVER	GO:0005310	dicarboxylic acid transmembrane transporter activity	MOLECULAR_FUNCTION	0.00330155	6.11883e-05	6	46	1742	131552
OVER	GO:0005313	L-glutamate transmembrane transporter activity	MOLECULAR_FUNCTION	0.0031538	5.77371e-05	5	27	1743	131571
OVER	GO:0015172	acidic amino acid transmembrane transporter activity	MOLECULAR_FUNCTION	0.0031538	5.77371e-05	5	27	1743	131571
OVER	GO:0015174	basic amino acid transmembrane transporter activity	MOLECULAR_FUNCTION	0.00448928	9.00941e-05	5	30	1743	131568
OVER	GO:0015189	L-lysine transmembrane transporter activity	MOLECULAR_FUNCTION	0.00448928	9.00941e-05	5	30	1743	131568

## Sheet: All_RC_vs_RI_up
Tags	GO ID	GO Name	GO Category	FDR	P-Value	Nr test	Nr Reference	Non Annotated Test	Non Annotated Ref
OVER	GO:0009987	cellular process	BIOLOGICAL_PROCESS	0.000461494	1.35596e-06	158	63277	95	69816
OVER	GO:0008152	metabolic process	BIOLOGICAL_PROCESS	6.74698e-05	1.6774e-07	154	59446	99	73647
OVER	GO:1901564	organonitrogen compound metabolic process	BIOLOGICAL_PROCESS	0.00149366	5.06383e-06	83	27579	170	105514
OVER	GO:0055114	oxidation-reduction process	BIOLOGICAL_PROCESS	0.00402229	1.72728e-05	38	9644	215	123449
OVER	GO:0055085	transmembrane transport	BIOLOGICAL_PROCESS	4.26038e-05	9.1476e-08	34	6433	219	126660
OVER	GO:0044281	small molecule metabolic process	BIOLOGICAL_PROCESS	6.68636e-05	1.58677e-07	34	6588	219	126505
OVER	GO:0019752	carboxylic acid metabolic process	BIOLOGICAL_PROCESS	1.99666e-08	1.42971e-11	32	4024	221	129069
OVER	GO:0043436	oxoacid metabolic process	BIOLOGICAL_PROCESS	2.36815e-08	2.14094e-11	32	4089	221	129004
OVER	GO:0006082	organic acid metabolic process	BIOLOGICAL_PROCESS	2.56032e-08	2.60401e-11	32	4121	221	128972
OVER	GO:0044283	small molecule biosynthetic process	BIOLOGICAL_PROCESS	3.43082e-07	3.87707e-10	24	2618	229	130475
OVER	GO:0016053	organic acid biosynthetic process	BIOLOGICAL_PROCESS	9.71926e-09	5.00763e-12	23	1913	230	131180
OVER	GO:0006520	cellular amino acid metabolic process	BIOLOGICAL_PROCESS	9.71926e-09	5.49173e-12	23	1922	230	131171
OVER	GO:0046394	carboxylic acid biosynthetic process	BIOLOGICAL_PROCESS	9.71926e-09	5.00763e-12	23	1913	230	131180
OVER	GO:0006811	ion transport	BIOLOGICAL_PROCESS	0.00767161	3.72787e-05	22	4346	231	128747
OVER	GO:1901605	alpha-amino acid metabolic process	BIOLOGICAL_PROCESS	1.99666e-08	1.57946e-11	18	1141	235	131952
OVER	GO:0008652	cellular amino acid biosynthetic process	BIOLOGICAL_PROCESS	9.71926e-09	2.73135e-12	16	748	237	132345
OVER	GO:1901607	alpha-amino acid biosynthetic process	BIOLOGICAL_PROCESS	7.70967e-07	9.58373e-10	13	668	240	132425
OVER	GO:0006820	anion transport	BIOLOGICAL_PROCESS	0.0021617	7.5729e-06	12	1265	241	131828
OVER	GO:0009072	aromatic amino acid family metabolic process	BIOLOGICAL_PROCESS	2.00515e-06	2.71916e-09	10	353	243	132740
OVER	GO:0015711	organic anion transport	BIOLOGICAL_PROCESS	0.00124051	3.78504e-06	10	789	243	132304
OVER	GO:0009073	aromatic amino acid family biosynthetic process	BIOLOGICAL_PROCESS	4.99365e-06	7.33613e-09	8	197	245	132896
OVER	GO:0008643	carbohydrate transport	BIOLOGICAL_PROCESS	0.00287361	1.10411e-05	8	534	245	132559
OVER	GO:0009064	glutamine family amino acid metabolic process	BIOLOGICAL_PROCESS	0.0014506	4.7539e-06	7	334	246	132759
OVER	GO:1901606	alpha-amino acid catabolic process	BIOLOGICAL_PROCESS	0.00570037	2.51231e-05	6	291	247	132802
OVER	GO:0009063	cellular amino acid catabolic process	BIOLOGICAL_PROCESS	0.009722	5.49328e-05	6	336	247	132757
OVER	GO:0042401	cellular biogenic amine biosynthetic process	BIOLOGICAL_PROCESS	0.00660318	3.05945e-05	5	180	248	132913
OVER	GO:0009309	amine biosynthetic process	BIOLOGICAL_PROCESS	0.00660318	3.05945e-05	5	180	248	132913
OVER	GO:0046219	indolalkylamine biosynthetic process	BIOLOGICAL_PROCESS	0.00397308	1.61635e-05	4	74	249	133019
OVER	GO:0000162	tryptophan biosynthetic process	BIOLOGICAL_PROCESS	0.00397308	1.61635e-05	4	74	249	133019
OVER	GO:0006525	arginine metabolic process	BIOLOGICAL_PROCESS	0.00402229	1.70003e-05	4	75	249	133018
OVER	GO:0110165	cellular anatomical entity	CELLULAR_COMPONENT	0.000286347	7.76621e-07	164	66025	89	67068
OVER	GO:0031224	intrinsic component of membrane	CELLULAR_COMPONENT	0.000286347	7.61589e-07	100	33979	153	99114
OVER	GO:0016021	integral component of membrane	CELLULAR_COMPONENT	0.00278143	1.03019e-05	95	33578	158	99515
OVER	GO:0071944	cell periphery	CELLULAR_COMPONENT	2.19736e-05	4.2214e-08	45	9843	208	123250
OVER	GO:0005886	plasma membrane	CELLULAR_COMPONENT	1.34561e-05	2.40283e-08	42	8639	211	124454
OVER	GO:0003824	catalytic activity	MOLECULAR_FUNCTION	2.66385e-13	3.01034e-17	168	53371	85	79722
OVER	GO:0043167	ion binding	MOLECULAR_FUNCTION	4.70879e-05	1.06425e-07	101	33124	152	99969
OVER	GO:0036094	small molecule binding	MOLECULAR_FUNCTION	0.00670964	3.1846e-05	65	20927	188	112166
OVER	GO:0043168	anion binding	MOLECULAR_FUNCTION	0.00861152	4.37924e-05	63	20279	190	112814
OVER	GO:0005524	ATP binding	MOLECULAR_FUNCTION	0.00278143	1.03726e-05	49	13629	204	119464
OVER	GO:0005215	transporter activity	MOLECULAR_FUNCTION	5.8633e-06	9.27632e-09	35	6143	218	126950
OVER	GO:0022857	transmembrane transporter activity	MOLECULAR_FUNCTION	1.34561e-05	2.43301e-08	33	5778	220	127315
OVER	GO:0022804	active transmembrane transporter activity	MOLECULAR_FUNCTION	2.44457e-05	4.97257e-08	21	2624	232	130469
OVER	GO:0016829	lyase activity	MOLECULAR_FUNCTION	0.0004567	1.29026e-06	17	2170	236	130923
OVER	GO:0015291	secondary active transmembrane transporter activity	MOLECULAR_FUNCTION	0.00890811	4.73139e-05	12	1530	241	131563
OVER	GO:0008514	organic anion transmembrane transporter activity	MOLECULAR_FUNCTION	0.00126335	3.9975e-06	8	463	245	132630
OVER	GO:0016836	hydro-lyase activity	MOLECULAR_FUNCTION	0.00831056	4.13227e-05	7	471	246	132622
OVER	GO:0005342	organic acid transmembrane transporter activity	MOLECULAR_FUNCTION	0.00929779	5.14851e-05	6	332	247	132761
OVER	GO:0046943	carboxylic acid transmembrane transporter activity	MOLECULAR_FUNCTION	0.00929779	5.14851e-05	6	332	247	132761
OVER	GO:0004568	chitinase activity	MOLECULAR_FUNCTION	0.00890811	4.6465e-05	4	98	249	132995

## Sheet: All_SC_vs_SI_up
Tags	GO ID	GO Name	GO Category	FDR	P-Value	Nr test	Nr Reference	Non Annotated Test	Non Annotated Ref
OVER	GO:0008152	metabolic process	BIOLOGICAL_PROCESS	1.69273e-07	1.9129e-10	203	59397	124	73622
OVER	GO:0009987	cellular process	BIOLOGICAL_PROCESS	0.00498714	2.08525e-05	193	63242	134	69777
OVER	GO:1901564	organonitrogen compound metabolic process	BIOLOGICAL_PROCESS	6.02164e-05	1.49707e-07	108	27554	219	105465
OVER	GO:0055114	oxidation-reduction process	BIOLOGICAL_PROCESS	8.59558e-05	2.23413e-07	51	9631	276	123388
OVER	GO:0044281	small molecule metabolic process	BIOLOGICAL_PROCESS	2.09786e-07	2.60781e-10	46	6576	281	126443
OVER	GO:0006082	organic acid metabolic process	BIOLOGICAL_PROCESS	4.76584e-08	2.1543e-11	37	4116	290	128903
OVER	GO:0043436	oxoacid metabolic process	BIOLOGICAL_PROCESS	4.76584e-08	1.7322e-11	37	4084	290	128935
OVER	GO:0019752	carboxylic acid metabolic process	BIOLOGICAL_PROCESS	8.05107e-08	4.54914e-11	36	4020	291	128999
OVER	GO:0006520	cellular amino acid metabolic process	BIOLOGICAL_PROCESS	2.21345e-08	5.00271e-12	26	1919	301	131100
OVER	GO:0044283	small molecule biosynthetic process	BIOLOGICAL_PROCESS	7.51941e-06	1.41327e-08	25	2617	302	130402
OVER	GO:0046394	carboxylic acid biosynthetic process	BIOLOGICAL_PROCESS	5.71094e-07	8.38989e-10	23	1913	304	131106
OVER	GO:0016053	organic acid biosynthetic process	BIOLOGICAL_PROCESS	5.71094e-07	8.38989e-10	23	1913	304	131106
OVER	GO:1901605	alpha-amino acid metabolic process	BIOLOGICAL_PROCESS	1.56408e-07	1.41402e-10	19	1140	308	131879
OVER	GO:0008652	cellular amino acid biosynthetic process	BIOLOGICAL_PROCESS	1.56408e-07	1.25328e-10	16	748	311	132271
OVER	GO:0006790	sulfur compound metabolic process	BIOLOGICAL_PROCESS	0.000519495	1.8199e-06	14	1167	313	131852
OVER	GO:1901607	alpha-amino acid biosynthetic process	BIOLOGICAL_PROCESS	1.00892e-05	2.05227e-08	13	668	314	132351
OVER	GO:0009072	aromatic amino acid family metabolic process	BIOLOGICAL_PROCESS	1.60435e-07	1.63172e-10	12	351	315	132668
OVER	GO:0006575	cellular modified amino acid metabolic process	BIOLOGICAL_PROCESS	0.0004784	1.56181e-06	10	548	317	132471
OVER	GO:0006749	glutathione metabolic process	BIOLOGICAL_PROCESS	2.42032e-05	5.47028e-08	10	376	317	132643
OVER	GO:0009073	aromatic amino acid family biosynthetic process	BIOLOGICAL_PROCESS	1.75716e-06	2.78e-09	9	196	318	132823
OVER	GO:0006586	indolalkylamine metabolic process	BIOLOGICAL_PROCESS	0.000296149	8.36673e-07	6	121	321	132898
OVER	GO:0042435	indole-containing compound biosynthetic process	BIOLOGICAL_PROCESS	0.00164055	6.30339e-06	6	174	321	132845
OVER	GO:0042430	indole-containing compound metabolic process	BIOLOGICAL_PROCESS	0.0034286	1.39484e-05	6	201	321	132818
OVER	GO:0006568	tryptophan metabolic process	BIOLOGICAL_PROCESS	0.000296149	8.36673e-07	6	121	321	132898
OVER	GO:0046219	indolalkylamine biosynthetic process	BIOLOGICAL_PROCESS	0.0004784	1.56781e-06	5	73	322	132946
OVER	GO:0000162	tryptophan biosynthetic process	BIOLOGICAL_PROCESS	0.0004784	1.56781e-06	5	73	322	132946
OVER	GO:0110165	cellular anatomical entity	CELLULAR_COMPONENT	0.00641498	2.89975e-05	199	65990	128	67029
OVER	GO:0031224	intrinsic component of membrane	CELLULAR_COMPONENT	0.000519495	1.80805e-06	122	33957	205	99062
OVER	GO:0016021	integral component of membrane	CELLULAR_COMPONENT	0.00138747	5.1742e-06	119	33554	208	99465
OVER	GO:0071944	cell periphery	CELLULAR_COMPONENT	0.000623586	2.25503e-06	49	9839	278	123180
OVER	GO:0005886	plasma membrane	CELLULAR_COMPONENT	5.55327e-05	1.31787e-07	48	8633	279	124386
OVER	GO:0003824	catalytic activity	MOLECULAR_FUNCTION	2.18408e-13	2.46816e-17	207	53332	120	79687
OVER	GO:0043167	ion binding	MOLECULAR_FUNCTION	2.89379e-06	4.90529e-09	129	33096	198	99923
OVER	GO:0043168	anion binding	MOLECULAR_FUNCTION	0.00233605	9.23966e-06	80	20262	247	112757
OVER	GO:0005524	ATP binding	MOLECULAR_FUNCTION	0.00630654	2.7082e-05	58	13620	269	119399
OVER	GO:0016491	oxidoreductase activity	MOLECULAR_FUNCTION	0.000406122	1.19326e-06	48	9329	279	123690
OVER	GO:0005215	transporter activity	MOLECULAR_FUNCTION	0.00640736	2.8239e-05	33	6145	294	126874
OVER	GO:0022804	active transmembrane transporter activity	MOLECULAR_FUNCTION	7.51941e-06	1.44457e-08	25	2620	302	130399
OVER	GO:0016829	lyase activity	MOLECULAR_FUNCTION	0.00781615	3.70978e-05	17	2170	310	130849
OVER	GO:0015291	secondary active transmembrane transporter activity	MOLECULAR_FUNCTION	0.00762267	3.53181e-05	14	1528	313	131491
OVER	GO:0016765	transferase activity, transferring alkyl or aryl (other than methyl) groups	MOLECULAR_FUNCTION	2.42032e-05	5.19943e-08	13	725	314	132294
OVER	GO:0004364	glutathione transferase activity	MOLECULAR_FUNCTION	1.56408e-07	1.34929e-10	12	345	315	132674
